# Supplementary material for: Proteome-Wide Analysis Reveals TFEB Targets for Establishment of a Prognostic Signature to Predict Clinical Outcomes of Colorectal Cancer
Source: Cancers (Basel). 2023 Jan 25;15(3):744. doi: 10.3390/cancers15030744 (PMC9913156; doi:10.3390/cancers15030744)
Supplement: Supplementary file 1 [file cancers-15-00744-s001.zip]

Archive with 4 entries (4 files):
- cancers-2083394-supplementary.pdf
- Table S1.xlsx
- Table S2.xlsx
- Table S3.xlsx
