# Supplementary material for: Proteome-Wide Analysis Reveals TFEB Targets for Establishment of a Prognostic Signature to Predict Clinical Outcomes of Colorectal Cancer
Source: Cancers (Basel). 2023 Jan 25;15(3):744. doi: 10.3390/cancers15030744 (PMC9913156; doi:10.3390/cancers15030744)
Supplement: Supplementary file 1 [file cancers-15-00744-s001.zip › Table S1.xlsx]

## Sheet: Table S1
Table. S1 The quantifiable protein list in TFEB-WT, TFEB-S142A/S138A and control datasets.
Protein Accession	Protein Description	Gene Name	Control			TFEB-WT			TFEB-S142A/S138A
			Rep.1	Rep.2	Rep.3	Rep.1	Rep.2	Rep.3	Rep.1	Rep.2	Rep.3
Q9Y6Y8	SEC23-interacting protein	SEC23IP	1.26224e+06	1.25633e+06	1.42299e+06	1.34991e+06	1.37878e+06	1.30286e+06	1.15791e+06	1.20613e+06	1.1307e+06
Q9Y6Y0	Influenza virus NS1A-binding protein	IVNS1ABP	242698	239991	228000	204188	259342	232195	278714	304763	313232
Q9Y6X9	ATPase MORC2	MORC2	443969	442034	485448	454924	479947	470267	397159	409869	398294
Q9Y6X5	Bis(5'-adenosyl)-triphosphatase ENPP4	ENPP4	147101	146012	122873	139875	155204	149509	228086	213973	220469
Q9Y6X4	Soluble lamin-associated protein of 75 kDa	FAM169A	137062	160414	189605	169309	213039	190139	160644	170666	177951
Q9Y6W5	Wiskott-Aldrich syndrome protein family member 2	WASF2	1.05852e+06	1.02862e+06	1.30518e+06	1.14509e+06	1.34357e+06	1.28506e+06	1.16911e+06	1.23224e+06	1.10629e+06
Q9Y6W3	Calpain-7	CAPN7	196358	201913	172275	232025	212985	216361	217712	208420	209523
Q9Y6V7	Probable ATP-dependent RNA helicase DDX49	DDX49	352305	363865	359745	353463	384714	382351	314189	294623	340804
Q9Y6U3	Adseverin	SCIN	16456.4	10951.8	22425.8	27063.3	40322.3	31779.5	12380.6	15566.3	19065.8
Q9Y6R4	Mitogen-activated protein kinase kinase kinase 4	MAP3K4	61073.2	59637.8	70537.7	35577.5	63888.4	61958.7	58242.8	44681.9	39627.6
Q9Y6R0	Numb-like protein	NUMBL	158267	157172	136062	160023	136399	128477	162752	164411	129726
Q9Y6Q5	AP-1 complex subunit mu-2	AP1M2	487932	532619	519274	662691	722097	646646	656982	641824	535961
Q9Y6N5	Sulfide:quinone oxidoreductase, mitochondrial	SQOR	1.60197e+06	1.59653e+06	2.11424e+06	2.01523e+06	2.16411e+06	2.09549e+06	2.04519e+06	2.44017e+06	2476749
Q9Y6N1	Cytochrome c oxidase assembly protein COX11, mitochondrial	COX11	370235	386892	384863	306579	360716	348363	332848	381839	317589
Q9Y6M9	NADH dehydrogenase [ubiquinone] 1 beta subcomplex subunit 9	NDUFB9	924517	957702	1.11945e+06	1.03852e+06	1.04206e+06	944282	1271366	1.34069e+06	1.30194e+06
Q9Y6M7	Sodium bicarbonate cotransporter 3	SLC4A7	173631	171744	162746	155149	154494	167626	176663	179709	179573
Q9Y6M5	Zinc transporter 1	SLC30A1	238273	239064	252384	286918	299148	298501	220153	228752	220163
Q9Y6M1	Insulin-like growth factor 2 mRNA-binding protein 2	IGF2BP2	628206	622418	794587	711912	808579	802532	656178	670950	614202
Q9Y6K5	2'-5'-oligoadenylate synthase 3	OAS3	457611	488461	483718	538060	485317	473348	409710	447965	448565
Q9Y6K0	Choline/ethanolaminephosphotransferase 1	CEPT1	867580	853407	861372	1.12683e+06	908152	951979	946636	922664	902040
Q9Y6J9	TAF6-like RNA polymerase II p300/CBP-associated factor-associated factor 65 kDa subunit 6L	TAF6L	173899	177388	218573	177607	186708	215598	174734	190574	166599
Q9Y6I9	Testis-expressed protein 264	TEX264	244518	250488	321312	496824	512881	479347	420523	447648	451017
Q9Y6I4	Ubiquitin carboxyl-terminal hydrolase 3	USP3	87572	77885.6	98696.2	85364.8	99900.6	100459	66552.1	66679.2	62072.1
Q9Y6I3	Epsin-1	EPN1	108444	95993.2	85682.4	110746	98940.3	107022	132129	110285	111404
Q9Y6H1	Coiled-coil-helix-coiled-coil-helix domain-containing protein 2	CHCHD2	694166	686800	800008	1.22658e+06	1.26174e+06	1204194	1.0205e+06	1.08035e+06	995146
Q9Y6G9	Cytoplasmic dynein 1 light intermediate chain 1	DYNC1LI1	1.04936e+06	1.10222e+06	1.28998e+06	1.04749e+06	1.06575e+06	1.06281e+06	1.01302e+06	955564	988667
Q9Y6G5	COMM domain-containing protein 10	COMMD10	252864	241301	270072	352080	333068	291829	320605	297639	292008
Q9Y6G3	39S ribosomal protein L42, mitochondrial	MRPL42	124785	131679	163805	147420	160012	172959	74769.1	184904	118723
Q9Y6E2	Basic leucine zipper and W2 domain-containing protein 2	BZW2	1.88984e+06	1.93623e+06	2330627	1.85007e+06	2.02068e+06	2.12728e+06	1.62848e+06	1.857e+06	1727136
Q9Y6E0	Serine/threonine-protein kinase 24	STK24	835648	848656	917259	859410	841073	845387	1070393	1.08687e+06	1.10801e+06
Q9Y6D9	Mitotic spindle assembly checkpoint protein MAD1	MAD1L1	118760	115405	146373	124264	134236	133919	109118	129038	120804
Q9Y6D6	Brefeldin A-inhibited guanine nucleotide-exchange protein 1	ARFGEF1	101312	98724.2	115554	123248	142647	92885.8	85584.1	112062	104602
Q9Y6D5	Brefeldin A-inhibited guanine nucleotide-exchange protein 2	ARFGEF2	170721	11619819	13335800	181823	218005	12058778	11846144	190786	12345105
Q9Y6C9	Mitochondrial carrier homolog 2	MTCH2	1.41346e+06	1.44515e+06	1.34754e+06	1.46008e+06	1.31782e+06	1.32156e+06	1.69853e+06	1.74117e+06	1.79802e+06
Q9Y6B7	AP-4 complex subunit beta-1	AP4B1	91951.6	95614.5	76086.5	86366.5	81596.5	92165.8	64622.9	68113.4	72676.2
Q9Y6B6	GTP-binding protein SAR1b	SAR1B	933778	924965	943148	973717	995448	866938	925984	981880	963078
Q9Y6A9	Signal peptidase complex subunit 1	SPCS1	266580	265403	225698	384621	358425	343870	200730	188753	186721
Q9Y6A5	Transforming acidic coiled-coil-containing protein 3	TACC3	217951	209896	246387	314744	318142	316167	298136	295058	312828
Q9Y6A4	Cilia- and flagella-associated protein 20	CFAP20	857138	882301	1.05646e+06	935904	1.01157e+06	926601	890304	911339	863832
Q9Y697	Cysteine desulfurase, mitochondrial	NFS1	245524	242546	290997	252250	253416	255096	228351	253706	232600
Q9Y696	Chloride intracellular channel protein 4	CLIC4	764260	840769	727330	933775	966076	1.04563e+06	1.01192e+06	1.06041e+06	1.00787e+06
Q9Y692	Glucocorticoid modulatory element-binding protein 1	GMEB1	105189	96704.8	137505	93924.2	98342.8	96671.7	75056.7	96840.8	89263.9
Q9Y680	Peptidyl-prolyl cis-trans isomerase FKBP7	FKBP7	53962.9	60315.7	55385.5	56010.1	58906.4	48629.2	53819.2	50325.1	52215.1
Q9Y679	Lipid droplet-regulating VLDL assembly factor AUP1	AUP1	376333	372634	368348	379390	388630	373293	326071	331132	344421
Q9Y678	Coatomer subunit gamma-1	COPG1	1.84268e+06	1.75445e+06	2.18181e+06	1.9906e+06	2.14382e+06	1.96542e+06	1574184	1.71458e+06	1.64091e+06
Q9Y676	28S ribosomal protein S18b, mitochondrial	MRPS18B	408500	396926	428562	384578	406943	401481	326191	322443	332880
Q9Y673	Dolichyl-phosphate beta-glucosyltransferase	ALG5	904267	918009	985740	909041	962919	909395	808592	812972	726620
Q9Y672	Dolichyl pyrophosphate Man9GlcNAc2 alpha-1,3-glucosyltransferase	ALG6	289973	274025	346892	281945	336739	326717	342711	361722	381386
Q9Y666	Solute carrier family 12 member 7	SLC12A7	89959.2	101752	117227	162707	145939	152762	143692	164388	161310
Q9Y657	Spindlin-1	SPIN1	168705	158902	192401	195271	203795	196571	172030	166481	172110
Q9Y653	Adhesion G-protein coupled receptor G1	ADGRG1	72638.8	70500.8	24698.8	80048.8	54118.9	71665.1	106964	95288.1	123176
Q9Y639	Neuroplastin	NPTN	187151	178929	191684	197320	191002	213509	175675	206116	207601
Q9Y624	Junctional adhesion molecule A	F11R	825376	821724	744656	1.13971e+06	906941	939748	969530	1.00758e+06	1.00106e+06
Q9Y620	DNA repair and recombination protein RAD54B	RAD54B	9776.62	8912.12	4172.74	3747.69	3739.47	7169.69	11055.1	10276.3	13793.9
Q9Y619	Mitochondrial ornithine transporter 1	SLC25A15	130086	139694	143747	161113	164340	144998	129936	132900	126686
Q9Y618	Nuclear receptor corepressor 2	NCOR2	106368	129310	105496	82406.3	99343	124861	116178	141437	127714
Q9Y617	Phosphoserine aminotransferase	PSAT1	4.53237e+06	4222409	5.11302e+06	5370578	5.78211e+06	5645414	5.67813e+06	5682452	5635959
Q9Y613	FH1/FH2 domain-containing protein 1	FHOD1	144125	157482	132988	116153	121587	126040	119847	130885	144790
Q9Y608	Leucine-rich repeat flightless-interacting protein 2	LRRFIP2	436085	435437	470637	505624	483623	490813	464592	457904	485440
Q9Y606	tRNA pseudouridine synthase A	PUS1	642309	643334	515967	583524	567433	560880	574102	599891	600437
Q9Y605	MORF4 family-associated protein 1	MRFAP1	94911.4	72789.5	117794	117167	182167	197659	140079	198757	178165
Q9Y5Z9	UbiA prenyltransferase domain-containing protein 1	UBIAD1	148239	133344	160638	91268.5	133735	128259	87381.2	106973	88488.7
Q9Y5Z4	Heme-binding protein 2	HEBP2	672308	662578	546712	669726	616765	634386	786332	678286	758524
Q9Y5Y6	Suppressor of tumorigenicity 14 protein	ST14	95849.3	108142	103780	135163	136795	136913	130533	127561	122523
Q9Y5Y5	Peroxisomal membrane protein PEX16	PEX16	132215	120418	128436	139989	139467	116267	159955	154484	143036
Q9Y5Y2	Cytosolic Fe-S cluster assembly factor NUBP2	NUBP2	727842	805913	854076	783358	768646	720673	792341	850628	818490
Q9Y5Y0	Feline leukemia virus subgroup C receptor-related protein 1	FLVCR1	176852	149638	234069	196525	212080	222162	183593	259851	229634
Q9Y5X3	Sorting nexin-5	SNX5	1.19006e+06	1.16251e+06	1.33096e+06	1.359e+06	1.34364e+06	1.32565e+06	1.17488e+06	1.28275e+06	1.21536e+06
Q9Y5X2	Sorting nexin-8	SNX8	147035	139242	158669	164864	162766	151931	139055	153713	174712
Q9Y5X1	Sorting nexin-9	SNX9	798852	794227	895969	877281	921705	862344	901247	949429	911280
Q9Y5W9	Sorting nexin-11	SNX11	111946	102289	143727	108016	123894	123523	111190	129524	120270
Q9Y5V0	Zinc finger protein 706	ZNF706	162862	130401	90852.1	161739	125732	155247	180972	158147	181333
Q9Y5U9	Immediate early response 3-interacting protein 1	IER3IP1	1.79461e+06	1.94245e+06	1.90363e+06	1.93245e+06	1.87091e+06	1.81825e+06	1.81911e+06	1.87915e+06	1.67601e+06
Q9Y5U2	Protein TSSC4	TSSC4	614562	639276	686568	771086	801789	752538	564376	642406	609799
Q9Y5T5	Ubiquitin carboxyl-terminal hydrolase 16	USP16	104943	112327	124644	119683	148204	117477	130444	140495	113874
Q9Y5S9	RNA-binding protein 8A	RBM8A	3013572	2.86371e+06	2.1198e+06	2.73161e+06	2.27891e+06	2411766	2.92017e+06	2.47781e+06	2749636
Q9Y5S2	Serine/threonine-protein kinase MRCK beta	CDC42BPB	319984	322032	305597	355772	351767	333059	375326	382157	367025
Q9Y5R8	Trafficking protein particle complex subunit 1	TRAPPC1	420203	423714	388572	489240	468569	499674	476294	489838	506436
Q9Y5Q9	General transcription factor 3C polypeptide 3	GTF3C3	340186	370969	417123	393638	383567	386289	410911	370524	426786
Q9Y5Q8	General transcription factor 3C polypeptide 5	GTF3C5	924879	915096	1.14427e+06	757726	940927	1.03804e+06	758233	928955	751857
Q9Y5P6	Mannose-1-phosphate guanyltransferase beta	GMPPB	607256	636529	691615	673464	684289	675109	616119	667015	639312
Q9Y5P4	Ceramide transfer protein	CERT1	197486	194407	215414	251831	245022	232688	198399	203782	197380
Q9Y5N6	Origin recognition complex subunit 6	ORC6	208452	198142	235646	293879	244833	259622	206439	192598	190003
Q9Y5N5	Methyltransferase N6AMT1	N6AMT1	66702.1	58972.4	13886.1	39239.7	27615.2	29647.6	67051.4	50890.6	69907.4
Q9Y5M8	Signal recognition particle receptor subunit beta	SRPRB	1.57603e+06	1.52023e+06	1.73545e+06	1.66763e+06	1.74149e+06	1735560	1396059	1.48277e+06	1.41018e+06
Q9Y5L4	Mitochondrial import inner membrane translocase subunit Tim13	TIMM13	2.62597e+06	2.5604e+06	2.75413e+06	2.60999e+06	2.60044e+06	2372834	2340088	2.47688e+06	2.44862e+06
Q9Y5L0	Transportin-3	TNPO3	720698	727877	675418	664662	707033	718382	623188	645206	645446
Q9Y5K8	V-type proton ATPase subunit D	ATP6V1D	314150	290310	346043	338705	398234	361813	350807	370873	378721
Q9Y5K6	CD2-associated protein	CD2AP	915074	899660	1.00793e+06	1.05785e+06	1.03626e+06	1.02052e+06	996082	968144	932723
Q9Y5K5	Ubiquitin carboxyl-terminal hydrolase isozyme L5	UCHL5	1.51021e+06	1.44389e+06	1.79232e+06	1.40026e+06	1.50819e+06	1.42753e+06	1.44041e+06	1.53529e+06	1.48037e+06
Q9Y5J9	Mitochondrial import inner membrane translocase subunit Tim8 B	TIMM8B	713632	708750	703763	604294	578951	579636	568025	633812	654421
Q9Y5J7	Mitochondrial import inner membrane translocase subunit Tim9	TIMM9	671125	659688	771174	805182	801164	763388	750731	776430	781717
Q9Y5J6	Mitochondrial import inner membrane translocase subunit Tim10 B	TIMM10B	113188	122131	132688	90049.4	96781.5	126158	153546	136626	137612
Q9Y5J1	U3 small nucleolar RNA-associated protein 18 homolog	UTP18	810802	799326	899859	804253	863617	864870	722716	679344	719155
Q9Y5B9	FACT complex subunit SPT16	SUPT16H	5.261e+06	5419906	5841816	5388611	5380458	5.48745e+06	4858208	5257133	5.00111e+06
Q9Y5B8	Nucleoside diphosphate kinase 7	NME7	81485.6	96635.5	105617	108679	92102.5	86987.9	101687	62273.8	106056
Q9Y5B6	PAX3- and PAX7-binding protein 1	PAXBP1	171662	170471	189764	186267	178149	172467	165592	177967	177275
Q9Y5B0	RNA polymerase II subunit A C-terminal domain phosphatase	CTDP1	343797	325161	399959	385510	433252	389626	289641	298351	280684
Q9Y5A9	YTH domain-containing family protein 2	YTHDF2	882468	866350	1117790	809291	923054	886004	857091	815896	843411
Q9Y5A7	NEDD8 ultimate buster 1	NUB1	114770	683409	766986	721696	156733	158505	132117	140900	122621
Q9Y597	BTB/POZ domain-containing protein KCTD3	KCTD3	48010.6	59889.7	54330.6	59420.9	62579.5	59250.7	38937.8	54233	53331.5
Q9Y587	AP-4 complex subunit sigma-1	AP4S1	168042	161266	124532	211731	158025	160726	200484	181371	169630
Q9Y584	Mitochondrial import inner membrane translocase subunit Tim22	TIMM22	369682	347228	399122	461073	450044	415798	419248	454119	449469
Q9Y580	RNA-binding protein 7	RBM7	118916	115429	125696	116603	128956	116620	120133	118702	115544
Q9Y575	Ankyrin repeat and SOCS box protein 3	ASB3	27945.3	27333.5	9490.76	35085.5	17313.5	22616.4	41352.1	29423.9	39244.5
Q9Y570	Protein phosphatase methylesterase 1	PPME1	985952	967365	1.01035e+06	915362	976287	1.04156e+06	1.02025e+06	1020645	988762
Q9Y548	Protein YIPF1	YIPF1	182049	179095	224980	157362	176791	184731	209122	181804	166872
Q9Y547	Intraflagellar transport protein 25 homolog	HSPB11	3.11254e+06	3.29105e+06	2.67343e+06	2595243	2.35665e+06	2.35155e+06	2471832	2289336	2430455
Q9Y546	Leucine-rich repeat-containing protein 42	LRRC42	291584	303458	361183	272731	309938	307719	238212	288357	277080
Q9Y535	DNA-directed RNA polymerase III subunit RPC8	POLR3H	24162.4	20157.2	38241.2	33834.1	28394.4	29242.7	19237.4	22939.3	22426.7
Q9Y530	ADP-ribose glycohydrolase OARD1	OARD1	62682	72529.4	68210.2	93416.1	93505.5	100820	97497.5	96193.3	90375.4
Q9Y520	Protein PRRC2C	PRRC2C	984983	960530	1080333	1.11124e+06	1.10812e+06	1.1311e+06	816039	858809	857793
Q9Y512	Sorting and assembly machinery component 50 homolog	SAMM50	850378	891863	843547	918610	860757	846917	837117	952917	845927
Q9Y508	E3 ubiquitin-protein ligase RNF114	RNF114	319005	299580	369726	366014	362452	363579	278073	303792	273047
Q9Y4Z0	U6 snRNA-associated Sm-like protein LSm4	LSM4	1.09793e+06	1.07916e+06	1.17403e+06	1.19489e+06	1.25738e+06	1.19393e+06	1.14672e+06	1.19503e+06	1.13916e+06
Q9Y4Y9	U6 snRNA-associated Sm-like protein LSm5	LSM5	1.82503e+06	1.53789e+06	2.26948e+06	1295220	1.53716e+06	1.75952e+06	1.64437e+06	1.78973e+06	1.60608e+06
Q9Y4X5	E3 ubiquitin-protein ligase ARIH1	ARIH1	423639	428962	522795	451502	500560	498747	409472	437367	430366
Q9Y4W6	AFG3-like protein 2	AFG3L2	1.20537e+06	1.16824e+06	1.28899e+06	1.17233e+06	1.28687e+06	1.23936e+06	1.21354e+06	1265227	1259827
Q9Y4W2	Ribosomal biogenesis protein LAS1L	LAS1L	746106	714840	876277	717865	752916	744735	682586	717242	672124
Q9Y4R8	Telomere length regulation protein TEL2 homolog	TELO2	375074	370882	440335	397028	430495	368423	331336	306195	316367
Q9Y4P8	WD repeat domain phosphoinositide-interacting protein 2	WIPI2	189452	171913	231891	200301	208058	220446	188746	122361	207743
Q9Y4P3	Transducin beta-like protein 2	TBL2	448224	445409	526986	436375	551417	564862	464063	466755	464229
Q9Y4P1	Cysteine protease ATG4B	ATG4B	353114	367396	475241	499903	477686	435342	347940	365522	335983
Q9Y4L1	Hypoxia up-regulated protein 1	HYOU1	4.06268e+06	4.05002e+06	4.07558e+06	4.96579e+06	5274922	5018390	4150642	4.09768e+06	4152282
Q9Y4K4	Mitogen-activated protein kinase kinase kinase kinase 5	MAP4K5	95775.8	105851	110380	74722.6	105292	103095	84934.7	97077.9	80901.4
Q9Y4K1	Beta/gamma crystallin domain-containing protein 1	CRYBG1	866198	839328	894092	823490	862161	847239	870001	905255	892680
Q9Y4I1	Unconventional myosin-Va	MYO5A	203356	208964	190304	217279	229547	239812	233739	242820	246739
Q9Y4G6	Talin-2	TLN2	50978.4	21637.1	27721.1	71411.4	60988.5	63142.5	75684.5	75919.3	82686.6
Q9Y4F5	Centrosomal protein of 170 kDa protein B	CEP170B	138903	126725	148520	146341	152807	152901	148690	159747	144445
Q9Y4F1	FERM, ARHGEF and pleckstrin domain-containing protein 1	FARP1	52835.5	53565.5	72541.4	95358.7	84104.5	84207.8	61973	72630.9	55556.6
Q9Y4E8	Ubiquitin carboxyl-terminal hydrolase 15	USP15	472847	487962	538855	490098	541723	547497	466524	534170	497009
Q9Y4E6	WD repeat-containing protein 7	WDR7	42682.4	31559	18694.1	38443	23841.7	27329.7	31264	28888.7	41471
Q9Y4E5	E3 SUMO-protein ligase ZNF451	ZNF451	48210.4	49571.7	63695.3	53149.1	42518.9	32116.6	42920	31487.2	38789.6
Q9Y4C8	Probable RNA-binding protein 19	RBM19	175570	178460	207550	192387	185055	197525	140264	145271	139524
Q9Y4C2	TRPM8 channel-associated factor 1	TCAF1	239355	250738	222049	329896	261646	295741	285028	286780	276860
Q9Y4B6	DDB1- and CUL4-associated factor 1	DCAF1	237593	217681	271166	254909	273199	245557	223066	196201	213309
Q9Y4B5	Microtubule cross-linking factor 1	MTCL1	73845.4	72975.7	66714.1	72563.6	71360.2	65538.8	45603.1	47472.3	45033.8
Q9Y4A5	Transformation/transcription domain-associated protein	TRRAP	169140	188950	218637	220198	231339	219987	188068	181399	190315
Q9Y496	Kinesin-like protein KIF3A	KIF3A	40802.7	33199.8	32983.1	40832.4	45234.1	46806.4	34661.1	43499.8	43338.1
Q9Y490	Talin-1	TLN1	1.39991e+06	1.44729e+06	1.44272e+06	1.62875e+06	1.46728e+06	1.50172e+06	1.49109e+06	1.62011e+06	1.54384e+06
Q9Y487	V-type proton ATPase 116 kDa subunit a2	ATP6V0A2	148707	146660	152019	134447	133382	151390	137863	139652	117086
Q9Y485	DmX-like protein 1	DMXL1	16351.3	10876.6	18808.1	7922.63	21983.2	16683	25787.9	24835.8	17050.7
Q9Y484	WD repeat domain phosphoinositide-interacting protein 4	WDR45	5.74648e+06	10311574	10848762	8502679	7.21714e+06	7.63973e+06	4.92844e+06	5.61378e+06	6258780
Q9Y478	5'-AMP-activated protein kinase subunit beta-1	PRKAB1	92489	79026.6	46525.8	85179.8	58439.7	56965.4	108604	89480.1	103328
Q9Y450	HBS1-like protein	HBS1L	380139	391913	397638	396630	427219	400802	381705	353105	322907
Q9Y448	Small kinetochore-associated protein	KNSTRN	660509	500619	865137	233491	792212	695386	430927	490808	432195
Q9Y446	Plakophilin-3	PKP3	2.5846e+06	2.60973e+06	3084732	2.76213e+06	3.02727e+06	2.8299e+06	2.54039e+06	2.728e+06	2.64137e+06
Q9Y426	C2 domain-containing protein 2	C2CD2	47067.3	50860.3	36105.2	27296.3	25371.7	58640	53510.3	64072.9	62095.7
Q9Y421	Protein FAM32A	FAM32A	47037.1	53420.4	52961.6	94994.4	90267.2	93200.8	49054.2	39458.2	62474.2
Q9Y3Z3	Deoxynucleoside triphosphate triphosphohydrolase SAMHD1	SAMHD1	518232	517045	605455	484159	548064	576903	584359	587454	569419
Q9Y3Y2	Chromatin target of PRMT1 protein	CHTOP	907241	844546	1.00691e+06	802563	956807	909965	768607	829369	820767
Q9Y3X0	Coiled-coil domain-containing protein 9	CCDC9	157412	155699	161708	167979	187965	188142	134469	141010	130616
Q9Y3U8	60S ribosomal protein L36	RPL36	13909773	14080679	15796546	12414010	12574658	12847525	10662134	11585661	11028074
Q9Y3T9	Nucleolar complex protein 2 homolog	NOC2L	1825641	1.89348e+06	2.20797e+06	1.86327e+06	1.96289e+06	1.92717e+06	1.6269e+06	1.68531e+06	1.61826e+06
Q9Y3T6	R3H and coiled-coil domain-containing protein 1	R3HCC1	295129	320927	290646	291181	302191	337446	276365	305304	329823
Q9Y3S2	Zinc finger protein 330	ZNF330	122163	110047	107746	114933	107595	132071	109141	107159	95360.4
Q9Y3Q8	TSC22 domain family protein 4	TSC22D4	294718	280216	246844	381147	247671	193888	321989	318800	298781
Q9Y3Q3	Transmembrane emp24 domain-containing protein 3	TMED3	120577	111749	105650	124954	124544	111940	104177	100848	113866
Q9Y3P9	Rab GTPase-activating protein 1	RABGAP1	52913.2	44892.2	39683.3	51241.9	46892.6	51959.8	53636.3	44766.2	41852.5
Q9Y3L5	Ras-related protein Rap-2c	RAP2C	33843.5	25826.6	24932.5	37662.1	48208.5	48385.7	52626.2	79313.3	35484.2
Q9Y3L3	SH3 domain-binding protein 1	SH3BP1	204663	208968	201686	209729	212287	212354	221852	226171	218865
Q9Y3I1	F-box only protein 7	FBXO7	375547	352163	385068	360255	360852	375237	303881	339778	337932
Q9Y3I0	RNA-splicing ligase RtcB homolog	RTCB	2403138	2.38991e+06	2.60213e+06	2.42568e+06	2.37928e+06	2.33552e+06	2.5137e+06	2.73309e+06	2612096
Q9Y3F4	Serine-threonine kinase receptor-associated protein	STRAP	3.67542e+06	3.56099e+06	4.09852e+06	3.44593e+06	3.46619e+06	3525271	3.09563e+06	3.09824e+06	3109007
Q9Y3E7	Charged multivesicular body protein 3	CHMP3	718122	732074	852566	758176	855264	810014	778176	783475	777725
Q9Y3E5	Peptidyl-tRNA hydrolase 2, mitochondrial	PTRH2	733719	710840	831018	728087	659444	688195	709249	700066	676325
Q9Y3E1	Hepatoma-derived growth factor-related protein 3	HDGFL3	135552	126198	157877	143210	159101	145184	155178	156386	155054
Q9Y3E0	Vesicle transport protein GOT1B	GOLT1B	172107	175979	173198	165157	199481	184767	186207	219898	205964
Q9Y3D9	28S ribosomal protein S23, mitochondrial	MRPS23	706442	725087	711412	650995	666018	666734	717920	727359	709711
Q9Y3D8	Adenylate kinase isoenzyme 6	AK6	714810	730928	792903	687720	727098	736370	596886	681719	644616
Q9Y3D7	Mitochondrial import inner membrane translocase subunit TIM16	PAM16	95729.1	92304.2	102905	109516	111878	106486	106041	107949	114369
Q9Y3D6	Mitochondrial fission 1 protein	FIS1	345558	347035	434331	319278	319940	322617	403556	315933	376782
Q9Y3D5	28S ribosomal protein S18c, mitochondrial	MRPS18C	247184	251493	269253	245350	241638	216102	207860	220053	250811
Q9Y3D3	28S ribosomal protein S16, mitochondrial	MRPS16	375163	335729	338361	311918	296766	303158	347950	311968	338959
Q9Y3D0	Cytosolic iron-sulfur assembly component 2B	CIAO2B	279398	305035	288093	292952	302876	273322	289279	285723	264907
Q9Y3C8	Ubiquitin-fold modifier-conjugating enzyme 1	UFC1	777367	762995	890150	749726	783820	768253	775484	804241	752827
Q9Y3C6	Peptidyl-prolyl cis-trans isomerase-like 1	PPIL1	1.69937e+06	1.74915e+06	2.00092e+06	1.68211e+06	1.7432e+06	1.75101e+06	1.4878e+06	1.66231e+06	1.5752e+06
Q9Y3C4	EKC/KEOPS complex subunit TPRKB	TPRKB	132705	129984	143927	212211	182242	165918	119259	123954	121286
Q9Y3C1	Nucleolar protein 16	NOP16	825876	730028	874626	656642	682894	788081	714363	823453	779683
Q9Y3C0	WASH complex subunit 3	WASHC3	234843	249568	276591	249554	246806	227807	290911	308232	302896
Q9Y3B9	RRP15-like protein	RRP15	525912	521141	585702	538248	569353	483483	425428	483491	399104
Q9Y3B8	Oligoribonuclease, mitochondrial	REXO2	899901	871820	965849	953812	1.0093e+06	886695	948546	974564	943466
Q9Y3B7	39S ribosomal protein L11, mitochondrial	MRPL11	1.0744e+06	1.09942e+06	1369658	1.25046e+06	1.30323e+06	1.25482e+06	876367	1.01227e+06	997673
Q9Y3B6	ER membrane protein complex subunit 9	EMC9	160689	139306	134818	261359	230381	207267	145512	127753	122760
Q9Y3B4	Splicing factor 3B subunit 6	SF3B6	1.44025e+06	1519957	1.4079e+06	1.64651e+06	1.65982e+06	1.61503e+06	1.42399e+06	1.58239e+06	1.34321e+06
Q9Y3B3	Transmembrane emp24 domain-containing protein 7	TMED7	907791	862748	777109	985208	905831	887413	1.00538e+06	898854	927743
Q9Y3B2	Exosome complex component CSL4	EXOSC1	2.07247e+06	1.98063e+06	2.41478e+06	942321	2.03744e+06	2299633	2100362	2146764	2.44838e+06
Q9Y3A6	Transmembrane emp24 domain-containing protein 5	TMED5	1.17657e+06	1.28145e+06	1.3029e+06	1.34266e+06	1.42721e+06	1.32375e+06	1.32624e+06	1.30216e+06	1.40598e+06
Q9Y3A5	Ribosome maturation protein SBDS	SBDS	2057436	2.0849e+06	2461972	2.09425e+06	2.15984e+06	2.13857e+06	2.11285e+06	2.28804e+06	2220232
Q9Y3A4	Ribosomal RNA-processing protein 7 homolog A	RRP7A	326327	322823	381836	358105	358784	363161	302520	273390	259806
Q9Y3A3	MOB-like protein phocein	MOB4	191685	230478	225085	287166	270558	260474	205188	226458	218945
Q9Y3A2	Probable U3 small nucleolar RNA-associated protein 11	UTP11	191995	210408	210724	169009	188660	196311	156502	140636	149976
Q9Y399	28S ribosomal protein S2, mitochondrial	MRPS2	431348	434478	452087	390076	407391	384766	421870	433721	408877
Q9Y394	Dehydrogenase/reductase SDR family member 7	DHRS7	560370	540840	537063	705255	734077	737245	753274	713061	723424
Q9Y388	RNA-binding motif protein, X-linked 2	RBMX2	157474	142844	148612	156930	158509	154362	138605	138845	137018
Q9Y385	Ubiquitin-conjugating enzyme E2 J1	UBE2J1	185639	191446	224934	225385	243246	227174	188805	206478	195813
Q9Y383	Putative RNA-binding protein Luc7-like 2	LUC7L2	2329529	2.45666e+06	2402953	2420525	2324701	2.32965e+06	2301993	2301697	2171063
Q9Y376	Calcium-binding protein 39	CAB39	363143	375048	404748	354755	391498	375801	371722	366669	362096
Q9Y375	Complex I intermediate-associated protein 30, mitochondrial	NDUFAF1	170479	170392	202952	134586	182939	161116	141509	172142	169454
Q9Y371	Endophilin-B1	SH3GLB1	1.01221e+06	1.03885e+06	1.07234e+06	1.08641e+06	1076931	1.05945e+06	993939	1.15155e+06	1067430
Q9Y365	START domain-containing protein 10	STARD10	185431	189755	169634	225778	229306	196025	246024	259493	253512
Q9Y343	Sorting nexin-24	SNX24	49134.8	54074.4	51901.5	61726.9	63496.8	63819.7	66390.8	73763.3	69734.7
Q9Y334	von Willebrand factor A domain-containing protein 7	VWA7	1.06749e+06	1016895	1.01842e+06	631640	1.00017e+06	789728	983606	938077	1.06678e+06
Q9Y333	U6 snRNA-associated Sm-like protein LSm2	LSM2	1.44191e+06	1.56255e+06	2.08633e+06	1.55486e+06	1.62539e+06	1.65422e+06	1.57186e+06	1.77679e+06	1.61441e+06
Q9Y324	rRNA-processing protein FCF1 homolog	FCF1	408937	281126	399082	404416	380190	411603	319052	335024	332417
Q9Y320	Thioredoxin-related transmembrane protein 2	TMX2	387661	393672	389486	433032	440533	462223	355044	333962	350716
Q9Y316	Protein MEMO1	MEMO1	955938	987152	1.12998e+06	883582	1.00199e+06	952019	737732	843873	773450
Q9Y315	Deoxyribose-phosphate aldolase	DERA	185985	192526	177198	225050	227858	205823	195638	226879	218714
Q9Y314	Nitric oxide synthase-interacting protein	NOSIP	510532	546412	556151	610751	570709	605383	574836	595149	568330
Q9Y312	Protein AAR2 homolog	AAR2	109211	122706	86010	91584.1	90016.1	103453	89013.7	100378	93493.8
Q9Y305	Acyl-coenzyme A thioesterase 9, mitochondrial	ACOT9	716866	690989	764754	712902	779206	774922	707802	780370	701084
Q9Y303	N-acetylglucosamine-6-phosphate deacetylase	AMDHD2	439661	406125	495591	392405	386963	407601	412558	479277	461186
Q9Y2Z9	Ubiquinone biosynthesis monooxygenase COQ6, mitochondrial	COQ6	252972	273059	279854	308783	354504	420350	255293	302635	295151
Q9Y2Z4	Tyrosine--tRNA ligase, mitochondrial	YARS2	529596	551442	447193	474559	477699	494870	513137	504425	530892
Q9Y2Z0	Protein SGT1 homolog	SUGT1	1.28755e+06	1337530	1.13035e+06	1.42575e+06	1.25582e+06	1.34159e+06	1185819	1.3249e+06	1.32752e+06
Q9Y2Y1	DNA-directed RNA polymerase III subunit RPC10	POLR3K	31570.4	38995.4	64259.2	55155.5	36138.8	19381.3	51086.9	51590.1	38418.5
Q9Y2Y0	ADP-ribosylation factor-like protein 2-binding protein	ARL2BP	114850	139229	140462	143670	174294	160939	114506	128902	127838
Q9Y2X9	Zinc finger protein 281	ZNF281	82069.1	90185.1	79409.8	81784	88217	108638	79556.3	78984.7	70744.5
Q9Y2X7	ARF GTPase-activating protein GIT1	GIT1	288891	297014	367661	378069	395010	354972	315700	319852	344038
Q9Y2X3	Nucleolar protein 58	NOP58	5.49943e+06	5.64193e+06	6045993	5382475	5038733	5.6452e+06	4.70966e+06	5438380	5013587
Q9Y2X0	Mediator of RNA polymerase II transcription subunit 16	MED16	199237	211170	205779	200609	226792	204994	175192	183087	173873
Q9Y2W6	Tudor and KH domain-containing protein	TDRKH	39069.9	40737.9	32608.9	64532.7	38302.1	58117.8	53874.4	49289.1	51550.4
Q9Y2W2	WW domain-binding protein 11	WBP11	361202	385891	443500	467943	515771	475808	425530	436824	439110
Q9Y2W1	Thyroid hormone receptor-associated protein 3	THRAP3	4.00601e+06	4.04434e+06	4.22917e+06	3.63512e+06	3877300	3.57832e+06	3.71781e+06	3.71317e+06	3611911
Q9Y2V7	Conserved oligomeric Golgi complex subunit 6	COG6	202606	184084	154314	243506	200135	194023	220282	220711	230378
Q9Y2V2	Calcium-regulated heat-stable protein 1	CARHSP1	421770	414697	356836	477180	554743	502981	415719	416902	430979
Q9Y2U8	Inner nuclear membrane protein Man1	LEMD3	471692	475301	548905	418037	454044	500766	445750	474327	418446
Q9Y2T3	Guanine deaminase	GDA	1.62014e+06	1.44556e+06	1.60612e+06	1.50378e+06	1.64158e+06	1.51971e+06	1.61874e+06	1.5762e+06	1.66445e+06
Q9Y2T2	AP-3 complex subunit mu-1	AP3M1	928091	910941	1.0031e+06	927767	1.02231e+06	994081	959538	982827	976835
Q9Y2S7	Polymerase delta-interacting protein 2	POLDIP2	666449	631687	703743	617521	622112	641494	563353	571394	580595
Q9Y2S6	Translation machinery-associated protein 7	TMA7	1.3923e+06	1350392	1.45411e+06	1091632	1.34084e+06	1276065	1.1439e+06	1.28277e+06	1292182
Q9Y2R9	28S ribosomal protein S7, mitochondrial	MRPS7	1.22306e+06	1233462	1379377	1.25802e+06	1327806	1.26402e+06	1.21223e+06	1.26695e+06	1.22415e+06
Q9Y2R5	28S ribosomal protein S17, mitochondrial	MRPS17	286612	276062	287889	294105	243233	258199	283880	281213	285541
Q9Y2R4	Probable ATP-dependent RNA helicase DDX52	DDX52	439301	417832	483268	392868	436754	439357	355609	404229	396292
Q9Y2R0	Cytochrome c oxidase assembly factor 3 homolog, mitochondrial	COA3	336483	313514	364335	423899	451852	408718	331262	379644	351991
Q9Y2Q9	28S ribosomal protein S28, mitochondrial	MRPS28	648305	645229	569150	660071	617402	622706	607103	636404	664609
Q9Y2Q5	Ragulator complex protein LAMTOR2	LAMTOR2	231732	225395	174375	232756	181358	202761	279120	245009	250445
Q9Y2Q3	Glutathione S-transferase kappa 1	GSTK1	1.30994e+06	1.34764e+06	1.37324e+06	1.42048e+06	1.59769e+06	1.45941e+06	1.83024e+06	1.79347e+06	1.77702e+06
Q9Y2P8	RNA 3'-terminal phosphate cyclase-like protein	RCL1	471149	440267	523785	413268	436262	417602	391146	389928	384989
Q9Y2M2	Protein SSUH2 homolog	SSUH2	2.05856e+06	2.02786e+06	2.10254e+06	1649010	2.08308e+06	1.73957e+06	1.81175e+06	1.86528e+06	1.90303e+06
Q9Y2L9	Leucine-rich repeat and calponin homology domain-containing protein 1	LRCH1	163487	143911	173491	178329	166968	163267	155252	158355	145568
Q9Y2L5	Trafficking protein particle complex subunit 8	TRAPPC8	85259.6	80305.5	104243	95116.6	99457.2	102125	79549.1	83950.6	80133
Q9Y2L1	Exosome complex exonuclease RRP44	DIS3	1.86592e+06	1.82071e+06	2118540	1.80209e+06	1.81661e+06	1.88024e+06	1.69956e+06	1785432	1.82317e+06
Q9Y2K7	Lysine-specific demethylase 2A	KDM2A	206659	222330	261564	266281	228128	244751	179521	197398	195966
Q9Y2I1	Nischarin	NISCH	176814	198283	185448	149870	179881	157871	205484	216730	174956
Q9Y2H6	Fibronectin type-III domain-containing protein 3A	FNDC3A	279596	261536	297373	223244	289550	288867	276668	320247	350006
Q9Y2H2	Phosphatidylinositide phosphatase SAC2	INPP5F	6924.02	10775.7	8953.44	10659.9	7803.16	11118.2	9826.01	6379.27	5338.09
Q9Y2H1	Serine/threonine-protein kinase 38-like	STK38L	348275	334741	338957	404865	408517	372695	393930	387009	400897
Q9Y2H0	Disks large-associated protein 4	DLGAP4	245238	213146	256922	266372	297707	277589	256733	259994	265960
Q9Y2G8	DnaJ homolog subfamily C member 16	DNAJC16	94552	81296.8	71238.9	129776	104426	96262.8	98141.3	71617.5	63289.3
Q9Y2G5	GDP-fucose protein O-fucosyltransferase 2	POFUT2	314708	364801	222736	524829	490050	511966	313708	259988	273878
Q9Y2G3	Probable phospholipid-transporting ATPase IF	ATP11B	65684.4	59020.8	50224.3	68975.5	82062.2	73597	73503.1	70281	68389.2
Q9Y2E5	Epididymis-specific alpha-mannosidase	MAN2B2	204348	203606	239362	169586	187410	182734	258423	241105	292858
Q9Y2D5	A-kinase anchor protein 2	AKAP2	28599.4	36001.7	35147.6	33820	45930	37291.4	25655	22423.7	17685.7
Q9Y2D4	Exocyst complex component 6B	EXOC6B	106007	114374	134574	155605	157551	139164	135893	151612	138994
Q9Y2D2	UDP-N-acetylglucosamine transporter	SLC35A3	110098	80986.7	87484.8	112320	75900.8	71983.9	86273.5	129274	114577
Q9Y2C4	Nuclease EXOG, mitochondrial	EXOG	93118.6	103084	131752	104832	116348	99933.7	114677	97718.7	106274
Q9Y2B0	Protein canopy homolog 2	CNPY2	1.86273e+06	1.84376e+06	2.10553e+06	2.07996e+06	2.24327e+06	1983449	2.22465e+06	2151099	2056192
Q9Y2A9	N-acetyllactosaminide beta-1,3-N-acetylglucosaminyltransferase 3	B3GNT3	178291	165106	212753	241662	243255	247411	222969	201181	196474
Q9Y2A7	Nck-associated protein 1	NCKAP1	1.09355e+06	1.16342e+06	1.36059e+06	1.24045e+06	1.28224e+06	1.21758e+06	1.25533e+06	1.33708e+06	1.2546e+06
Q9Y296	Trafficking protein particle complex subunit 4	TRAPPC4	789954	802924	598161	911646	810065	842564	931678	904793	977402
Q9Y295	Developmentally-regulated GTP-binding protein 1	DRG1	2513208	2.44977e+06	1.71395e+06	1.86716e+06	1.7142e+06	1.89348e+06	2.02713e+06	2.15167e+06	2.17504e+06
Q9Y294	Histone chaperone ASF1A	ASF1A	422759	425183	452357	472637	510353	480116	459606	430281	437238
Q9Y291	28S ribosomal protein S33, mitochondrial	MRPS33	163366	178043	188205	182425	179947	160137	179125	184309	179105
Q9Y289	Sodium-dependent multivitamin transporter	SLC5A6	107151	102833	122272	97609.5	103803	98387.2	86859.4	78829	84343.1
Q9Y285	Phenylalanine--tRNA ligase alpha subunit	FARSA	2.92525e+06	3159818	3.58047e+06	3140331	3.31424e+06	3.0115e+06	3.01227e+06	3.18103e+06	3.10351e+06
Q9Y282	Endoplasmic reticulum-Golgi intermediate compartment protein 3	ERGIC3	280934	288264	285292	280122	271721	283247	286916	309860	320293
Q9Y281	Cofilin-2	CFL2	1.34709e+06	1.36808e+06	1.49032e+06	1.46251e+06	1.64479e+06	1.55079e+06	1.11315e+06	1.20769e+06	1.1423e+06
Q9Y277	Voltage-dependent anion-selective channel protein 3	VDAC3	5095224	5085921	5587441	4.83636e+06	4962262	5.01104e+06	5048049	5.36069e+06	5.38217e+06
Q9Y276	Mitochondrial chaperone BCS1	BCS1L	23488	73796.9	89124.7	90145.8	88899.2	103528	52481.4	77121.1	77144
Q9Y266	Nuclear migration protein nudC	NUDC	3.85313e+06	3.79426e+06	4.19795e+06	4.27222e+06	4288447	3.83471e+06	3141734	3.33565e+06	3.13647e+06
Q9Y265	RuvB-like 1	RUVBL1	3.7027e+06	3610711	3689269	3492053	3.44862e+06	3.35838e+06	2.98558e+06	3.13573e+06	3032750
Q9Y263	Phospholipase A-2-activating protein	PLAA	1.16511e+06	1.17456e+06	1.35416e+06	1.15901e+06	1.23067e+06	1.1528e+06	1.18362e+06	1.23666e+06	1.19561e+06
Q9Y262	Eukaryotic translation initiation factor 3 subunit L	EIF3L	2608537	2.52391e+06	3278895	2.53462e+06	2.66617e+06	2659756	2.19819e+06	2.46157e+06	2.38721e+06
Q9Y256	CAAX prenyl protease 2	RCE1	261374	276520	176088	196144	192424	201686	268892	247072	266086
Q9Y248	DNA replication complex GINS protein PSF2	GINS2	711014	678663	762826	761271	775245	760087	552690	902351	527793
Q9Y247	Protein FAM50B	FAM50B	314365	304805	340233	401140	401218	357329	340792	357429	372607
Q9Y244	Proteasome maturation protein	POMP	34694.3	37721.4	37680.9	73049.4	52386.4	62491.1	44121	47076.4	38862.3
Q9Y241	HIG1 domain family member 1A, mitochondrial	HIGD1A	1.41637e+06	1.83668e+06	2480180	2.30497e+06	2389241	2.50267e+06	1.61452e+06	2.3169e+06	1.89275e+06
Q9Y237	Peptidyl-prolyl cis-trans isomerase NIMA-interacting 4	PIN4	845356	940115	912030	835430	910397	833309	921006	910914	901166
Q9Y230	RuvB-like 2	RUVBL2	3.69115e+06	3.64931e+06	4.06163e+06	3.64806e+06	3738646	3.78285e+06	3.06412e+06	3.28236e+06	3.09539e+06
Q9Y224	RNA transcription, translation and transport factor protein	RTRAF	1.96376e+06	1865114	2.19371e+06	1.91905e+06	2.04727e+06	2.01477e+06	1.90619e+06	2.06316e+06	1.97047e+06
Q9Y223	Bifunctional UDP-N-acetylglucosamine 2-epimerase/N-acetylmannosamine kinase	GNE	583582	530578	598791	814127	819342	789298	759178	793579	762374
Q9Y221	60S ribosome subunit biogenesis protein NIP7 homolog	NIP7	726271	707906	633409	595155	521036	549108	650068	633936	688664
Q9Y217	Myotubularin-related protein 6	MTMR6	567121	546200	587044	546608	613644	620508	564159	627001	646099
Q9UQR1	Zinc finger protein 148	ZNF148	85637	82910.1	92570.4	100070	102205	109204	81119.1	103665	100395
Q9UQR0	Sex comb on midleg-like protein 2	SCML2	100932	95624.6	119548	102000	119011	122222	93488.3	111532	117255
Q9UQN3	Charged multivesicular body protein 2b	CHMP2B	519684	515287	583099	562077	570713	560435	467214	493850	474512
Q9UQE7	Structural maintenance of chromosomes protein 3	SMC3	990338	994934	1.19875e+06	1.05207e+06	1.20863e+06	1.12391e+06	958955	1.04085e+06	1.01102e+06
Q9UQB8	Brain-specific angiogenesis inhibitor 1-associated protein 2	BAIAP2	367707	366591	324823	346303	324199	328187	384864	348522	386376
Q9UQ90	Paraplegin	SPG7	114451	121889	147524	109651	115461	128526	103979	133189	124960
Q9UQ80	Proliferation-associated protein 2G4	PA2G4	12011073	11851756	13771936	11358237	11711277	11776212	10307698	10758090	10374737
Q9UQ35	Serine/arginine repetitive matrix protein 2	SRRM2	3.64131e+06	3.40629e+06	4254029	3.397e+06	3687327	3.6357e+06	3113838	2.9387e+06	3020645
Q9UQ13	Leucine-rich repeat protein SHOC-2	SHOC2	207646	187801	228019	212817	241892	218763	231064	255831	243225
Q9UPY8	Microtubule-associated protein RP/EB family member 3	MAPRE3	106396	136649	138199	99962.9	90865.5	119406	164099	155106	157484
Q9UPY5	Cystine/glutamate transporter	SLC7A11	15581.2	16172	17896.3	48798.4	47497.7	38455.6	21250.6	9246.33	13219.9
Q9UPY3	Endoribonuclease Dicer	DICER1	111157	85793.5	117276	93205.7	109737	101017	88832.3	98270.5	93178.8
Q9UPW6	DNA-binding protein SATB2	SATB2	427948	422351	341462	479141	523605	483511	451462	288855	224148
Q9UPW5	Cytosolic carboxypeptidase 1	AGTPBP1	62976	65258.9	39846.4	65584.5	58274.3	48425.9	62580	55123.5	57865.8
Q9UPW0	Forkhead box protein J3	FOXJ3	5982.24	6506.22	5183.87	3456.25	5244.03	8560.14	1670.98	7694.71	7753.17
Q9UPU5	Ubiquitin carboxyl-terminal hydrolase 24	USP24	64394.6	68636	62663.2	60498.7	60440.6	68058	52342.4	49893.5	57191.9
Q9UPT9	Ubiquitin carboxyl-terminal hydrolase 22	USP22	282209	265102	286241	261630	289523	294843	241697	254930	283429
Q9UPT8	Zinc finger CCCH domain-containing protein 4	ZC3H4	127797	123592	105568	112541	115122	109317	98781.6	106808	91545.5
Q9UPT5	Exocyst complex component 7	EXOC7	352843	396746	469266	424103	494998	473235	450382	423641	443704
Q9UPQ9	Trinucleotide repeat-containing gene 6B protein	TNRC6B	57180.6	60838.9	60254.1	51469.2	60127.9	58094.7	47749.1	53388.7	51728
Q9UPQ0	LIM and calponin homology domains-containing protein 1	LIMCH1	110667	100367	135474	140399	161618	158139	128050	129633	116102
Q9UPP1	Histone lysine demethylase PHF8	PHF8	76534.3	74633.7	91711.5	96289.3	86179	94139.7	88830.1	83331.2	68644.3
Q9UPN9	E3 ubiquitin-protein ligase TRIM33	TRIM33	197689	180754	213885	178609	172243	188330	143283	184601	193357
Q9UPN7	Serine/threonine-protein phosphatase 6 regulatory subunit 1	PPP6R1	206064	225202	245816	211723	211177	254952	175839	215991	196991
Q9UPN6	SR-related and CTD-associated factor 8	SCAF8	211053	206491	231380	194774	223062	226901	185214	202894	190526
Q9UPN4	Centrosomal protein of 131 kDa	CEP131	93991.1	102749	73504.6	87635.9	92430.9	104733	102820	114198	117891
Q9UPN3	Microtubule-actin cross-linking factor 1, isoforms 1/2/3/5	MACF1	883335	883072	1.00636e+06	2.22349e+06	2.06283e+06	1.82215e+06	520138	1.09102e+06	948750
Q9UPM8	AP-4 complex subunit epsilon-1	AP4E1	44246.5	47945.9	49661.8	54807	48548.4	47792.9	53443.1	33623.4	45018.8
Q9UP83	Conserved oligomeric Golgi complex subunit 5	COG5	206525	169312	136266	166273	150322	178142	194898	197257	235164
Q9UNZ5	Leydig cell tumor 10 kDa protein homolog	C19orf53	344053	331759	371079	294975	321810	320419	255744	295886	287112
Q9UNZ2	NSFL1 cofactor p47	NSFL1C	2943573	2825789	2.9386e+06	2.90217e+06	3.02279e+06	2.82465e+06	2883181	2854959	2.78175e+06
Q9UNY4	Transcription termination factor 2	TTF2	155180	141589	154670	134039	154527	184101	149520	167952	158387
Q9UNX4	WD repeat-containing protein 3	WDR3	920210	864952	861224	844180	853758	858879	779029	765536	757489
Q9UNX3	60S ribosomal protein L26-like 1	RPL26L1	382473	407974	424173	398243	478684	431431	417957	414158	416399
Q9UNW1	Multiple inositol polyphosphate phosphatase 1	MINPP1	279198	279654	335377	323623	341239	316501	342615	363006	341418
Q9UNS2	COP9 signalosome complex subunit 3	COPS3	1009309	1.0363e+06	1.03779e+06	789702	1.00881e+06	1071600	974028	1209818	1.0898e+06
Q9UNS1	Protein timeless homolog	TIMELESS	90068.2	100349	110265	109746	96338	93743.2	81971.5	86645.9	79479.6
Q9UNQ2	Probable dimethyladenosine transferase	DIMT1	721972	742585	755741	704784	682734	638603	592136	603131	586176
Q9UNP9	Peptidyl-prolyl cis-trans isomerase E	PPIE	435937	461642	521376	498224	511856	434197	420516	430480	442449
Q9UNN8	Endothelial protein C receptor	PROCR	475070	436956	404397	593854	486192	459703	612225	570340	609672
Q9UNN5	FAS-associated factor 1	FAF1	598747	612252	663364	645499	686222	644931	612283	625598	587937
Q9UNM6	26S proteasome non-ATPase regulatory subunit 13	PSMD13	2.5132e+06	2.45011e+06	2799711	2.48609e+06	2.66704e+06	2.71848e+06	2.39504e+06	2.57496e+06	2507148
Q9UNL2	Translocon-associated protein subunit gamma	SSR3	1.6774e+06	1811479	1.96669e+06	1.89984e+06	1.7657e+06	1.79546e+06	1811951	1.96061e+06	1.8673e+06
Q9UNK0	Syntaxin-8	STX8	93625.3	96536.8	98649.8	108687	111675	102613	93855.9	101370	94191.9
Q9UNI6	Dual specificity protein phosphatase 12	DUSP12	646273	597570	713624	632151	685184	665718	568729	574806	563247
Q9UNH7	Sorting nexin-6	SNX6	529448	515566	573654	573204	620779	607670	577155	603997	587927
Q9UNH6	Sorting nexin-7	SNX7	72493	76960.4	97437.4	98807.9	99794.4	94006.2	93952	109078	95476.5
Q9UNF1	Melanoma-associated antigen D2	MAGED2	461644	422508	473757	450569	515499	536143	524886	520306	569881
Q9UNF0	Protein kinase C and casein kinase substrate in neurons protein 2	PACSIN2	1.49687e+06	1.49797e+06	1.67609e+06	1.76613e+06	1.81498e+06	1.78329e+06	1.55956e+06	1.63106e+06	1.63157e+06
Q9UNE7	E3 ubiquitin-protein ligase CHIP	STUB1	1.75463e+06	1.84631e+06	2.06023e+06	1.78521e+06	1.87824e+06	1.75525e+06	1.77734e+06	1.99632e+06	1.86518e+06
Q9UN86	Ras GTPase-activating protein-binding protein 2	G3BP2	1.74517e+06	1.79012e+06	2.0176e+06	1.72234e+06	1.84875e+06	1.73868e+06	1.4686e+06	1.57313e+06	1.5578e+06
Q9UN81	LINE-1 retrotransposable element ORF1 protein	L1RE1	476052	453836	496808	575843	608486	598539	408049	459836	430418
Q9UN37	Vacuolar protein sorting-associated protein 4A	VPS4A	622300	598738	592060	630239	602452	585044	575100	597078	587575
Q9UMZ2	Synergin gamma	SYNRG	71127.8	91889	66537	86033.3	85821.6	87034.5	80493	98536.2	99275.4
Q9UMY4	Sorting nexin-12	SNX12	629042	624655	756275	662238	700044	676115	678161	707040	674626
Q9UMY1	Nucleolar protein 7	NOL7	344781	326410	393593	331146	329844	321804	276460	277690	290209
Q9UMX5	Neudesin	NENF	250419	269235	308409	299888	377842	337702	249816	291208	318554
Q9UMX0	Ubiquilin-1	UBQLN1	1.19087e+06	1141729	1.09074e+06	1024126	1.01844e+06	989073	1.05218e+06	1.09223e+06	1.00014e+06
Q9UMS4	Pre-mRNA-processing factor 19	PRPF19	4.39086e+06	4390564	4775055	4351228	4494795	4367141	4481941	4.68524e+06	4617530
Q9UMS0	NFU1 iron-sulfur cluster scaffold homolog, mitochondrial	NFU1	741268	851334	939267	841967	886680	784704	797832	876920	854132
Q9UMR2	ATP-dependent RNA helicase DDX19B	DDX19B	1.4788e+06	1402728	1.60317e+06	1.47036e+06	1.64669e+06	1497586	1.18895e+06	1.45505e+06	1355774
Q9UM54	Unconventional myosin-VI	MYO6	1.1935e+06	1.15811e+06	1364796	1.27181e+06	1.38081e+06	1.31718e+06	1.36825e+06	1.37725e+06	1294897
Q9UM22	Mammalian ependymin-related protein 1	EPDR1	473182	450497	488734	564074	528146	535290	563900	599438	604456
Q9UM13	Anaphase-promoting complex subunit 10	ANAPC10	29429.9	38573.7	34757.6	27708.3	29146.7	39257.1	30157.4	35610.7	45016.4
Q9UM00	Calcium load-activated calcium channel	TMCO1	1.45685e+06	1.42578e+06	1.57301e+06	1.45138e+06	1.55944e+06	1.5602e+06	1.56564e+06	1638661	1.58376e+06
Q9ULX9	Transcription factor MafF	MAFF	173955	173660	202055	205306	183493	205482	131971	136158	127478
Q9ULX6	A-kinase anchor protein 8-like	AKAP8L	343382	352405	324264	338083	364505	351505	326436	372808	343613
Q9ULX3	RNA-binding protein NOB1	NOB1	657916	660799	727311	624664	643985	621792	533379	599848	569184
Q9ULW3	Activator of basal transcription 1	ABT1	258675	274696	267414	247057	263316	257662	227826	212449	289372
Q9ULW0	Targeting protein for Xklp2	TPX2	176547	187909	236125	302920	284872	286173	332446	310317	334395
Q9ULV4	Coronin-1C	CORO1C	3916113	3.83193e+06	4238404	3.9673e+06	4003094	3.84971e+06	4117722	3929609	3.90845e+06
Q9ULV3	Cip1-interacting zinc finger protein	CIZ1	79496.8	88241.8	101109	102921	100327	112090	77499.1	73339.1	64839.8
Q9ULV0	Unconventional myosin-Vb	MYO5B	290753	316881	309011	325678	345223	345335	294018	310643	295590
Q9ULT8	E3 ubiquitin-protein ligase HECTD1	HECTD1	493830	484476	552411	543746	557353	530677	440621	453377	439671
Q9ULR0	Pre-mRNA-splicing factor ISY1 homolog	ISY1	210834	253838	227681	286764	253117	235501	212036	197879	202016
Q9ULQ1	Two pore calcium channel protein 1	TPCN1	9248.52	2821.07	4446.13	10073.8	7516.98	7065.65	13986.2	10714.1	10175.4
Q9ULM3	YEATS domain-containing protein 2	YEATS2	66397.5	62056.6	82627	87014.5	88214.2	82297.5	75820.6	9794.88	70605.3
Q9ULK4	Mediator of RNA polymerase II transcription subunit 23	MED23	290650	273645	285644	284225	284122	259829	285475	275035	267797
Q9ULJ3	Zinc finger and BTB domain-containing protein 21	ZBTB21	89760.9	67020	111937	117635	101118	112402	56423.2	120431	88614.7
Q9ULH7	Myocardin-related transcription factor B	MRTFB	59099.3	54946.8	74416.9	76239.6	75045.2	67207.2	48241.1	58201.5	50517.3
Q9ULH0	Kinase D-interacting substrate of 220 kDa	KIDINS220	46130.2	47153.1	40223	36569.5	55459.6	57327.2	52020.1	44256.3	54497
Q9ULG1	Chromatin-remodeling ATPase INO80	INO80	1.15894e+06	1.12405e+06	1.17732e+06	1.19651e+06	1.24642e+06	1.20691e+06	1.03593e+06	1.26489e+06	1.24664e+06
Q9ULE6	Paladin	PALD1	576864	599503	681580	575658	560653	550874	704918	720654	680728
Q9ULD2	Microtubule-associated tumor suppressor 1	MTUS1	170903	162997	169545	180672	181675	177771	143557	155804	149606
Q9ULC5	Long-chain-fatty-acid--CoA ligase 5	ACSL5	1574167	1.5229e+06	1.79596e+06	1.40202e+06	1524293	1.56029e+06	1.71198e+06	1.81474e+06	1.74042e+06
Q9ULC4	Malignant T-cell-amplified sequence 1	MCTS1	1.34443e+06	1.402e+06	1.65778e+06	1.43798e+06	1463226	1.49025e+06	1552697	1.5651e+06	1.54143e+06
Q9ULC3	Ras-related protein Rab-23	RAB23	277654	288458	326332	295601	313360	341007	332521	379610	365032
Q9ULA0	Aspartyl aminopeptidase	DNPEP	1.31025e+06	1.32994e+06	1.38529e+06	1.53256e+06	1.56278e+06	1.40687e+06	1.32538e+06	1.34105e+06	1.32217e+06
Q9UL63	Muskelin	MKLN1	83438.8	90549.9	105310	124123	107919	115946	93938.4	78598.1	89396.3
Q9UL54	Serine/threonine-protein kinase TAO2	TAOK2	33045.2	35755.8	30773.3	32366	27579.4	29167.7	36416.8	36835.7	35173.7
Q9UL46	Proteasome activator complex subunit 2	PSME2	2.14857e+06	2.38862e+06	2.56387e+06	2.42886e+06	2703015	2.58215e+06	2345993	2.62485e+06	2.51321e+06
Q9UL40	Zinc finger protein 346	ZNF346	48924.1	69061	84281.4	88520.5	95493.3	88775.3	57014.9	79912.9	84466.7
Q9UL33	Trafficking protein particle complex subunit 2-like protein	TRAPPC2L	287593	286802	362102	369300	396616	391713	352008	402492	366464
Q9UL26	Ras-related protein Rab-22A	RAB22A	208668	212982	228805	206884	216737	219517	169033	203554	187818
Q9UL25	Ras-related protein Rab-21	RAB21	1.8835e+06	1.85941e+06	1.75829e+06	1.97882e+06	1.89599e+06	1.8921e+06	1.97352e+06	1.93883e+06	2.04044e+06
Q9UL18	Protein argonaute-1	AGO1	200692	201332	196318	281159	244951	225254	228902	251188	219289
Q9UL15	BAG family molecular chaperone regulator 5	BAG5	173699	171632	179600	170798	172654	185761	142102	147400	132353
Q9UL03	Integrator complex subunit 6	INTS6	45182.4	49460.7	50001.2	61898.1	57034	44827.9	506900	39987	35767.5
Q9UKZ1	CCR4-NOT transcription complex subunit 11	CNOT11	113663	123026	150082	133627	141908	136929	118960	123160	124655
Q9UKY7	Protein CDV3 homolog	CDV3	1.54741e+06	1.6283e+06	1.78218e+06	1.7666e+06	1.82695e+06	1.69307e+06	1.48652e+06	1.56985e+06	1.50457e+06
Q9UKX7	Nuclear pore complex protein Nup50	NUP50	1.03665e+06	1.09938e+06	1.20325e+06	1073142	1.05383e+06	1039402	999472	1.11958e+06	1.06197e+06
Q9UKV8	Protein argonaute-2	AGO2	246573	248698	236511	233237	200580	217088	245208	237265	229441
Q9UKV5	E3 ubiquitin-protein ligase AMFR	AMFR	139514	161245	182810	188850	201148	214287	161776	138465	136900
Q9UKV3	Apoptotic chromatin condensation inducer in the nucleus	ACIN1	1076168	1.13016e+06	915258	1.09095e+06	976862	1.05332e+06	1.02675e+06	1.04634e+06	1.02925e+06
Q9UKU7	Isobutyryl-CoA dehydrogenase, mitochondrial	ACAD8	192722	186014	220118	173245	200558	179169	184184	194772	202941
Q9UKS6	Protein kinase C and casein kinase substrate in neurons protein 3	PACSIN3	57721.3	61662.8	76280.7	70627	67166.1	69544.1	59451	55150.4	56039.7
Q9UKR5	Ergosterol biosynthetic protein 28 homolog	ERG28	710485	717327	797739	734818	766470	749909	840858	880254	859481
Q9UKN8	General transcription factor 3C polypeptide 4	GTF3C4	395978	409610	468369	454114	480956	468687	399840	393526	388445
Q9UKM9	RNA-binding protein Raly	RALY	2.88684e+06	2796805	3.25326e+06	2.69215e+06	2.98009e+06	3.09044e+06	2.71944e+06	2.85999e+06	2.85162e+06
Q9UKM7	Endoplasmic reticulum mannosyl-oligosaccharide 1,2-alpha-mannosidase	MAN1B1	76993.7	76445.1	61199.1	89587.6	96571.6	98285	92263.9	90084.6	97921.6
Q9UKL0	REST corepressor 1	RCOR1	387339	426534	519305	459726	468394	482680	455066	424038	451467
Q9UKK9	ADP-sugar pyrophosphatase	NUDT5	1.23278e+06	1.20041e+06	1.47403e+06	1.26898e+06	1.24272e+06	1.23165e+06	1.31004e+06	1.33316e+06	1216776
Q9UKK6	NTF2-related export protein 1	NXT1	77493.2	51970.8	29604.6	39375.4	42418.3	45434.6	47068.7	32476.5	45958
Q9UKK3	Protein mono-ADP-ribosyltransferase PARP4	PARP4	123013	122398	88618.1	222020	177956	171012	203672	181134	176497
Q9UKJ3	G patch domain-containing protein 8	GPATCH8	144142	135351	144595	136118	131349	146860	125199	125229	109473
Q9UKI8	Serine/threonine-protein kinase tousled-like 1	TLK1	74333.5	72682.6	78196.9	95011	109355	94103	71157	76542.9	76006.9
Q9UKG1	DCC-interacting protein 13-alpha	APPL1	99973.9	100393	98416.3	148927	159080	141318	123638	114878	111324
Q9UKF6	Cleavage and polyadenylation specificity factor subunit 3	CPSF3	360960	369337	392282	397851	446178	402216	385563	398269	371768
Q9UKE5	TRAF2 and NCK-interacting protein kinase	TNIK	108982	116687	108161	106601	101326	97499.6	82844	84087.6	80914.9
Q9UKD2	mRNA turnover protein 4 homolog	MRTO4	3.6615e+06	3.45883e+06	3.85648e+06	3.23766e+06	3501956	3349514	2.9745e+06	2.95e+06	2.97274e+06
Q9UKD1	Glucocorticoid modulatory element-binding protein 2	GMEB2	92494.1	89839.2	122570	78859.4	96470.1	108204	66893.1	79078.9	80734.5
Q9UKB1	F-box/WD repeat-containing protein 11	FBXW11	63652.1	56274.1	69262.8	81174	85340.5	80946.1	70512.3	69825.6	79061.7
Q9UK99	F-box only protein 3	FBXO3	80133.4	81292.2	68776.8	34295.6	79204.3	81904.4	88374.9	54587.3	69150.9
Q9UK76	Jupiter microtubule associated homolog 1	JPT1	3432481	3487352	3326418	3035200	3087493	3128775	3.07649e+06	3168653	3.22639e+06
Q9UK61	Protein TASOR	TASOR	99201	60716.1	99239	106819	91052.8	93473.9	77948.4	86947.2	78002.4
Q9UK59	Lariat debranching enzyme	DBR1	466848	466339	531653	475008	477371	493139	429209	461153	464402
Q9UK45	U6 snRNA-associated Sm-like protein LSm7	LSM7	1.12178e+06	1123151	1.20059e+06	975545	1.02439e+06	1.07954e+06	1093232	1.17799e+06	1.15956e+06
Q9UK41	Vacuolar protein sorting-associated protein 28 homolog	VPS28	482713	524959	620602	533385	603224	551755	534914	604015	499441
Q9UJZ1	Stomatin-like protein 2, mitochondrial	STOML2	1.5052e+06	1.42658e+06	1598485	1.69785e+06	1.80945e+06	1.62698e+06	1.30999e+06	1.31654e+06	1291024
Q9UJY5	ADP-ribosylation factor-binding protein GGA1	GGA1	59328	64634.3	92732.5	91898.4	97577.5	96203.1	57402.1	91112.4	65505.3
Q9UJY4	ADP-ribosylation factor-binding protein GGA2	GGA2	131651	136031	114548	109401	120052	145786	147965	142161	140560
Q9UJX6	Anaphase-promoting complex subunit 2	ANAPC2	103604	127774	120011	128003	114922	104743	134830	127682	131960
Q9UJX5	Anaphase-promoting complex subunit 4	ANAPC4	229939	230817	233008	204902	206977	214654	209672	224090	219130
Q9UJX4	Anaphase-promoting complex subunit 5	ANAPC5	193877	203077	239856	183453	221623	208186	173706	171166	180028
Q9UJX3	Anaphase-promoting complex subunit 7	ANAPC7	423466	421439	532573	407899	393366	404068	415994	456785	391928
Q9UJX2	Cell division cycle protein 23 homolog	CDC23	285474	299012	205644	247807	212804	224364	325398	258702	286169
Q9UJW0	Dynactin subunit 4	DCTN4	431150	429381	489188	480079	470159	460733	437972	492393	460019
Q9UJV9	Probable ATP-dependent RNA helicase DDX41	DDX41	336304	320736	381364	355985	358742	361181	295732	320996	317053
Q9UJU6	Drebrin-like protein	DBNL	901277	900789	1.17844e+06	914539	1.03837e+06	929655	923909	993747	962745
Q9UJS0	Calcium-binding mitochondrial carrier protein Aralar2	SLC25A13	1589094	1.4762e+06	1.66841e+06	1.82413e+06	1.81704e+06	1.68384e+06	1.64403e+06	1.75009e+06	1.69228e+06
Q9UJM3	ERBB receptor feedback inhibitor 1	ERRFI1	142781	155811	171015	192746	148618	140180	93807	105054	110446
Q9UJK0	18S rRNA aminocarboxypropyltransferase	TSR3	127333	130196	146018	154358	138268	136779	95752.7	123238	96933.2
Q9UJG1	Motile sperm domain-containing protein 1	MOSPD1	71458.1	74713.3	73991.8	74422.4	81185.1	58695.8	41382.2	87248.1	74851.5
Q9UJC5	SH3 domain-binding glutamic acid-rich-like protein 2	SH3BGRL2	734100	744208	888223	1.00282e+06	1.08448e+06	877162	974288	884949	802607
Q9UJC3	Protein Hook homolog 1	HOOK1	448752	453026	570247	524144	538593	581171	426531	515238	484573
Q9UJA5	tRNA (adenine(58)-N(1))-methyltransferase non-catalytic subunit TRM6	TRMT6	716094	654607	591778	598555	612909	596472	556956	570728	571319
Q9UJ83	2-hydroxyacyl-CoA lyase 1	HACL1	115129	119311	123635	139371	132818	138951	133782	141449	141194
Q9UJ70	N-acetyl-D-glucosamine kinase	NAGK	1.66167e+06	1.70716e+06	1.83286e+06	1.98041e+06	2.02621e+06	1.88326e+06	2.00941e+06	2.06468e+06	2.02096e+06
Q9UJ68	Mitochondrial peptide methionine sulfoxide reductase	MSRA	93051.1	85542	90138.2	87252	86299.6	98208.8	79544.9	93851.2	78576.3
Q9UJ41	Rab5 GDP/GTP exchange factor	RABGEF1	108173	100244	109186	117812	117874	107033	119057	113587	109648
Q9UIV1	CCR4-NOT transcription complex subunit 7	CNOT7	217516	242096	204643	255838	234361	207397	212203	211993	227097
Q9UIS9	Methyl-CpG-binding domain protein 1	MBD1	140202	143047	173249	161479	178912	178747	167949	165311	154778
Q9UIQ6	Leucyl-cystinyl aminopeptidase	LNPEP	361619	356397	420362	448183	453065	430123	410747	445050	420303
Q9UIJ7	GTP:AMP phosphotransferase AK3, mitochondrial	AK3	2.31877e+06	2.28863e+06	2.7181e+06	2.67007e+06	2.99268e+06	2.7974e+06	2.45884e+06	2.55472e+06	2.49284e+06
Q9UII4	E3 ISG15--protein ligase HERC5	HERC5	79471.1	89386	80126.2	95936.4	109507	96348.2	100555	106803	102231
Q9UII2	ATPase inhibitor, mitochondrial	ATP5IF1	535584	556792	585459	456435	572853	568884	684285	752392	777388
Q9UIG0	Tyrosine-protein kinase BAZ1B	BAZ1B	837738	830378	936658	867722	838307	890915	682553	698434	678465
Q9UIF9	Bromodomain adjacent to zinc finger domain protein 2A	BAZ2A	245042	262308	267070	320085	314843	286407	291843	301138	286180
Q9UIF8	Bromodomain adjacent to zinc finger domain protein 2B	BAZ2B	582152	594064	668068	600126	681520	567907	556698	613855	606942
Q9UID3	Vacuolar protein sorting-associated protein 51 homolog	VPS51	304323	293573	311854	315747	345538	322661	279324	328730	288144
Q9UIC8	Leucine carboxyl methyltransferase 1	LCMT1	344197	339174	336925	394697	379315	362911	321221	360682	356211
Q9UIA9	Exportin-7	XPO7	785589	791351	917526	789595	834809	823887	727332	830220	760266
Q9UI43	rRNA methyltransferase 2, mitochondrial	MRM2	111193	106705	142148	132190	130645	130741	92953.8	113533	113179
Q9UI30	Multifunctional methyltransferase subunit TRM112-like protein	TRMT112	1852193	1.8585e+06	2280877	2.16386e+06	2.16252e+06	2.00318e+06	1.67864e+06	1.84518e+06	1.71716e+06
Q9UI26	Importin-11	IPO11	348005	354336	253462	308407	271935	263323	357873	292185	304326
Q9UI14	Prenylated Rab acceptor protein 1	RABAC1	205683	219556	254612	357275	369521	358738	304360	314949	328578
Q9UI12	V-type proton ATPase subunit H	ATP6V1H	311190	352851	398209	383772	422492	419311	419295	445659	422861
Q9UI10	Translation initiation factor eIF-2B subunit delta	EIF2B4	713107	723296	820339	670924	725175	726463	639764	661013	649657
Q9UI09	NADH dehydrogenase [ubiquinone] 1 alpha subcomplex subunit 12	NDUFA12	491922	511079	512869	521684	539590	546895	808542	805434	574692
Q9UHY8	Fasciculation and elongation protein zeta-2	FEZ2	106131	101736	81791.4	164648	129240	119636	130602	123375	129632
Q9UHY7	Enolase-phosphatase E1	ENOPH1	2.32305e+06	2.44382e+06	2.00451e+06	2.13572e+06	2.12838e+06	2.28736e+06	2.03221e+06	2.12087e+06	2.30317e+06
Q9UHY1	Nuclear receptor-binding protein	NRBP1	371341	380565	430334	449959	452852	403500	381928	417765	397142
Q9UHX1	Poly(U)-binding-splicing factor PUF60	PUF60	2.84566e+06	2.72263e+06	3.38838e+06	2.84451e+06	2.92778e+06	2789493	2.39074e+06	2.49827e+06	2.40491e+06
Q9UHV9	Prefoldin subunit 2	PFDN2	1918499	1.83308e+06	2165948	1.91342e+06	2.04047e+06	1.85532e+06	1.82655e+06	1.8548e+06	1.87929e+06
Q9UHV7	Mediator of RNA polymerase II transcription subunit 13	MED13	69265.1	70301	65097.1	76434.8	74935.8	62830.4	59346.9	59269	44638.4
Q9UHR6	Zinc finger HIT domain-containing protein 2	ZNHIT2	103730	102502	127664	105207	108540	101599	85153	100120	93192.6
Q9UHR5	SAP30-binding protein	SAP30BP	472694	427183	501163	507697	513716	477145	440371	448860	440185
Q9UHR4	Brain-specific angiogenesis inhibitor 1-associated protein 2-like protein 1	BAIAP2L1	382421	423414	474186	503458	484576	418246	395270	412302	399501
Q9UHQ9	NADH-cytochrome b5 reductase 1	CYB5R1	391351	377215	440910	439140	463965	431541	496801	481062	480733
Q9UHQ4	B-cell receptor-associated protein 29	BCAP29	60850.5	61370.1	57342.1	70709.6	72346.9	61827.1	65780.2	66635.7	61178.7
Q9UHP3	Ubiquitin carboxyl-terminal hydrolase 25	USP25	86344.2	89136.6	71266.4	79691	88925.5	79040.6	84898.2	73643.2	80740.1
Q9UHN6	Cell surface hyaluronidase	CEMIP2	193864	170157	222905	167856	171653	155432	203695	206224	202334
Q9UHL4	Dipeptidyl peptidase 2	DPP7	247326	240587	196563	244621	255169	247486	320477	275092	321982
Q9UHK6	Alpha-methylacyl-CoA racemase	AMACR	374567	407355	389710	409670	399674	368909	468538	453915	434536
Q9UHK0	Nuclear fragile X mental retardation-interacting protein 1	NUFIP1	47031.3	53404	58474.2	68764.9	74665.6	76916.9	44020.7	43385.2	50714.1
Q9UHJ6	Sedoheptulokinase	SHPK	185739	178001	216876	204257	206082	202401	164080	157187	152339
Q9UHJ3	Scm-like with four MBT domains protein 1	SFMBT1	20498.4	18555.4	12439.6	18476	23461.7	13216	16554.1	22478	26188.2
Q9UHI6	Probable ATP-dependent RNA helicase DDX20	DDX20	252929	251901	317101	256216	270322	302469	198248	241002	228036
Q9UHG3	Prenylcysteine oxidase 1	PCYOX1	839692	875531	924890	978995	1.05761e+06	1.04648e+06	1.02926e+06	1.05144e+06	1100128
Q9UHD9	Ubiquilin-2	UBQLN2	256593	282417	316340	287974	312989	293996	247571	269895	251148
Q9UHD8	Septin-9	SEPTIN9	3.03157e+06	2.99609e+06	3.53223e+06	3.30979e+06	3525313	3187263	3260213	3.52584e+06	3.44908e+06
Q9UHD2	Serine/threonine-protein kinase TBK1	TBK1	238253	246864	252447	246656	241808	241814	247126	246441	212138
Q9UHD1	Cysteine and histidine-rich domain-containing protein 1	CHORDC1	1.56059e+06	1.48275e+06	1529345	1.30805e+06	1.47172e+06	1.5543e+06	1.21654e+06	1.23112e+06	1.25514e+06
Q9UHB9	Signal recognition particle subunit SRP68	SRP68	1745374	1.76581e+06	1.73091e+06	1.87526e+06	1816665	1.93096e+06	1.82256e+06	1.93113e+06	1.82567e+06
Q9UHB7	AF4/FMR2 family member 4	AFF4	90541.3	88400	63766.6	115201	96303.6	89406.1	96943.5	97460.8	95966.8
Q9UHB6	LIM domain and actin-binding protein 1	LIMA1	1.35721e+06	1.3945e+06	1.47083e+06	1725465	1.72477e+06	1662712	1.74484e+06	1.71184e+06	1.7151e+06
Q9UHA4	Ragulator complex protein LAMTOR3	LAMTOR3	868370	891866	615747	862200	703038	777802	983371	947653	969854
Q9UHA3	Probable ribosome biogenesis protein RLP24	RSL24D1	434535	419623	338409	430537	379508	451019	359804	350414	359610
Q9UH99	SUN domain-containing protein 2	SUN2	168704	158777	192919	231271	223551	222689	200143	194454	193102
Q9UH65	Switch-associated protein 70	SWAP70	686537	671451	694882	689061	740793	731409	745490	717509	730411
Q9UH62	Armadillo repeat-containing X-linked protein 3	ARMCX3	286266	284657	302973	333152	347218	326517	391476	367657	366031
Q9UH36	SRR1-like protein	SRRD	63845.6	63458.1	77810.6	52022.6	73406.1	103120	61869.2	108134	39816.6
Q9UH17	DNA dC->dU-editing enzyme APOBEC-3B	APOBEC3B	1.0966e+06	1.20625e+06	1.35123e+06	999449	981518	1.04388e+06	993106	1.04756e+06	1.07711e+06
Q9UGY1	Nucleolar protein 12	NOL12	171818	144167	88843.4	127127	145344	182381	168912	147275	143932
Q9UGV2	Protein NDRG3	NDRG3	457947	421827	479606	424161	428668	404148	496713	452482	443787
Q9UGU0	Transcription factor 20	TCF20	144062	132301	171488	167284	166667	167412	142615	145535	84413.7
Q9UGR2	Zinc finger CCCH domain-containing protein 7B	ZC3H7B	285962	381209	391163	195423	294623	213057	440299	299679	405839
Q9UGP8	Translocation protein SEC63 homolog	SEC63	1.27478e+06	1.25686e+06	1253578	1.3792e+06	1.39573e+06	1.37096e+06	1.43597e+06	1.46319e+06	1.44024e+06
Q9UGP4	LIM domain-containing protein 1	LIMD1	60779.7	62141.6	67742	95489.8	86418.1	85177.4	64601.8	66218.2	53369.5
Q9UGN5	Poly [ADP-ribose] polymerase 2	PARP2	44788.1	40443.1	56243.7	41686.2	53664	51022.3	43878.2	40855.9	41912.6
Q9UGM6	Tryptophan--tRNA ligase, mitochondrial	WARS2	258223	212611	229626	173586	201360	218154	239705	235805	214295
Q9UGK3	Signal-transducing adaptor protein 2	STAP2	36577.9	36002.7	40219	57318.3	41228.1	37532.1	45858.8	41868.5	39665.6
Q9UGJ1	Gamma-tubulin complex component 4	TUBGCP4	223850	238541	279861	263781	278904	249429	235139	246340	256167
Q9UGI8	Testin	TES	1.64941e+06	1671238	1.83076e+06	1.84311e+06	1918396	1880142	1.80587e+06	1.72511e+06	1.70009e+06
Q9UG63	ATP-binding cassette sub-family F member 2	ABCF2	1009567	994043	917335	970331	888796	914372	752966	835803	785173
Q9UG56	Phosphatidylserine decarboxylase proenzyme, mitochondrial	PISD	174167	166715	133919	161445	138708	143596	154955	151146	162170
Q9UFW8	CGG triplet repeat-binding protein 1	CGGBP1	179164	183122	243424	257640	241512	251083	202207	239438	221000
Q9UFN0	Protein NipSnap homolog 3A	NIPSNAP3A	181912	182746	183008	212519	215886	209277	267333	258374	278313
Q9UFG5	UPF0449 protein C19orf25	C19orf25	291478	308979	324193	249877	286566	322171	242750	311163	267566
Q9UFC0	Leucine-rich repeat and WD repeat-containing protein 1	LRWD1	213680	218441	258815	223381	213673	220802	171448	213686	185882
Q9UEY8	Gamma-adducin	ADD3	1.25121e+06	1.29942e+06	1.36125e+06	1.41714e+06	1.44849e+06	1.47844e+06	1.59021e+06	1.61333e+06	1.53252e+06
Q9UEW8	STE20/SPS1-related proline-alanine-rich protein kinase	STK39	307703	286559	329505	336564	297991	312694	275434	324477	320759
Q9UEU0	Vesicle transport through interaction with t-SNAREs homolog 1B	VTI1B	134454	134515	149222	138991	151021	139777	126477	139072	135981
Q9UET6	Putative tRNA (cytidine(32)/guanosine(34)-2'-O)-methyltransferase	FTSJ1	89460.5	88860.7	109667	95757.9	114418	102202	58845.5	56101.7	61796.1
Q9UER7	Death domain-associated protein 6	DAXX	74322.3	86393.8	107616	102266	94144.8	103845	69983.3	79633	89230.8
Q9UEE9	Craniofacial development protein 1	CFDP1	223971	233344	271922	271045	318853	284384	321069	300613	305912
Q9UDY8	Mucosa-associated lymphoid tissue lymphoma translocation protein 1	MALT1	201225	198961	233414	175846	159418	160899	130959	146299	140869
Q9UDY4	DnaJ homolog subfamily B member 4	DNAJB4	83613.5	77635.9	87974.2	115957	112295	101968	84010.3	95666.8	96176.8
Q9UDY2	Tight junction protein ZO-2	TJP2	1.33401e+06	1.27183e+06	1.28585e+06	1389400	1326010	1.37798e+06	1.27664e+06	1.23978e+06	1.28245e+06
Q9UDX5	Mitochondrial fission process protein 1	MTFP1	204319	188989	127259	180635	170839	162153	214230	170914	209834
Q9UDW1	Cytochrome b-c1 complex subunit 9	UQCR10	365824	359856	370940	344245	326766	307504	375222	344005	335449
Q9UDT6	CAP-Gly domain-containing linker protein 2	CLIP2	41902.9	39354	37053.8	44336.9	42730.1	40229.4	58950.6	40531.5	49811.3
Q9UDR5	Alpha-aminoadipic semialdehyde synthase, mitochondrial	AASS	20692	20303.7	28396.5	38346.4	34800.6	35654.7	31056.4	30524.2	29864.6
Q9UBX3	Mitochondrial dicarboxylate carrier	SLC25A10	1113241	1.07451e+06	1.04381e+06	1.15254e+06	1.13662e+06	1.08313e+06	1.2733e+06	1.2206e+06	1.30834e+06
Q9UBW8	COP9 signalosome complex subunit 7a	COPS7A	900725	678149	833498	793567	1.01561e+06	1.00062e+06	809590	894920	837256
Q9UBW7	Zinc finger MYM-type protein 2	ZMYM2	101174	134339	165281	179240	192903	169404	165376	145817	145985
Q9UBV8	Peflin	PEF1	328166	331956	293741	315081	269051	281916	350749	321333	369892
Q9UBV7	Beta-1,4-galactosyltransferase 7	B4GALT7	177532	171718	205537	188225	205614	210760	200520	229335	226215
Q9UBV2	Protein sel-1 homolog 1	SEL1L	130151	119600	132263	166894	164247	155650	135905	139832	144024
Q9UBU9	Nuclear RNA export factor 1	NXF1	628333	637880	745031	649964	659619	748527	563147	642672	598174
Q9UBU8	Mortality factor 4-like protein 1	MORF4L1	304320	325143	350011	440542	447425	431394	382273	418577	406666
Q9UBU6	Protein FAM8A1	FAM8A1	58923	57147.5	54091.7	79995.9	75749	82494.6	63889.1	63590.7	67660.1
Q9UBT2	SUMO-activating enzyme subunit 2	UBA2	1.21453e+06	1.17669e+06	1.31793e+06	1.11879e+06	1.27308e+06	1.26359e+06	1.11127e+06	1.11861e+06	1.09679e+06
Q9UBS8	E3 ubiquitin-protein ligase RNF14	RNF14	71681.7	87147.7	95433.9	113599	108948	101538	111157	106018	100290
Q9UBS4	DnaJ homolog subfamily B member 11	DNAJB11	1.29731e+06	1.25694e+06	1.15188e+06	1.23304e+06	1.29312e+06	1.40193e+06	1.21003e+06	1.31008e+06	1.4333e+06
Q9UBR2	Cathepsin Z	CTSZ	118898	135843	125578	184517	172478	179688	136494	123639	110184
Q9UBQ7	Glyoxylate reductase/hydroxypyruvate reductase	GRHPR	1.063e+06	1.0942e+06	1.32789e+06	1.16285e+06	1.2217e+06	1227192	1.13119e+06	1.12112e+06	1.11639e+06
Q9UBQ5	Eukaryotic translation initiation factor 3 subunit K	EIF3K	2.75001e+06	2949935	3.38072e+06	3.35327e+06	3471878	3.33838e+06	2392338	2.62704e+06	2.63763e+06
Q9UBQ0	Vacuolar protein sorting-associated protein 29	VPS29	1.30285e+06	1.39872e+06	1.6107e+06	1527161	1.72792e+06	1591155	1.27574e+06	1.51064e+06	1.43194e+06
Q9UBP9	PTB domain-containing engulfment adapter protein 1	GULP1	245265	265394	306409	264848	296194	209034	174874	183653	188779
Q9UBP6	tRNA (guanine-N(7)-)-methyltransferase	METTL1	254284	257005	253176	242005	228171	218875	187098	191649	197587
Q9UBP0	Spastin	SPAST	130886	134241	162140	143232	174228	149072	134299	156737	162302
Q9UBN7	Histone deacetylase 6	HDAC6	180013	187265	190287	229948	231502	238113	258787	284258	285929
Q9UBM7	7-dehydrocholesterol reductase	DHCR7	893344	888549	1.01041e+06	814419	858294	889715	876002	941653	915512
Q9UBL3	Set1/Ash2 histone methyltransferase complex subunit ASH2	ASH2L	248669	289855	274182	292766	269024	243808	287731	283082	298430
Q9UBK9	Protein UXT	UXT	213364	222270	171896	218313	198328	210885	200576	189954	205374
Q9UBK7;Q9UNT1	Rab-like protein 2A;Rab-like protein 2B	RABL2A	36354.1	32116.9	35507.7	43566.9	22511.7	30640.7	38205.7	28784.3	37970.8
Q9UBI6	Guanine nucleotide-binding protein G(I)/G(S)/G(O) subunit gamma-12	GNG12	1.77284e+06	1.87472e+06	2.07154e+06	2.55268e+06	2526375	2.45222e+06	2.13316e+06	2.33141e+06	2.16741e+06
Q9UBI4	Stomatin-like protein 1	STOML1	23592.6	21542.1	12515.5	19231.5	18532.9	17832.3	22193.5	19961.2	16842.5
Q9UBI1	COMM domain-containing protein 3	COMMD3	160865	158729	138626	169676	153077	149393	155755	159255	158064
Q9UBF8	Phosphatidylinositol 4-kinase beta	PI4KB	87271.1	82647.1	121644	102598	100006	89386.7	90872.8	105530	97043.6
Q9UBF6	RING-box protein 2	RNF7	246438	229866	276257	267901	277238	252864	246322	249263	225806
Q9UBF2	Coatomer subunit gamma-2	COPG2	905479	884791	978461	806184	882910	882804	909950	908387	898008
Q9UBE0	SUMO-activating enzyme subunit 1	SAE1	540820	536010	576440	477985	519162	518524	557213	586474	604520
Q9UBD5	Origin recognition complex subunit 3	ORC3	172748	214533	220590	267223	237868	243708	214099	202422	211186
Q9UBC2	Epidermal growth factor receptor substrate 15-like 1	EPS15L1	309218	289421	318836	347894	379135	304459	318642	314078	338196
Q9UBB9	Tuftelin-interacting protein 11	TFIP11	255952	261497	273784	308135	276577	267411	245438	223133	237817
Q9UBB6	Neurochondrin	NCDN	114186	117750	125796	133366	113953	116096	92155.4	98277.4	92334.1
Q9UBB5	Methyl-CpG-binding domain protein 2	MBD2	170445	165288	204543	200383	209525	192526	169223	172532	151993
Q9UBB4	Ataxin-10	ATXN10	1.51502e+06	1.5186e+06	1.58561e+06	1.85507e+06	1.87477e+06	1.76469e+06	1.44993e+06	1.50994e+06	1435264
Q9P2X3	Protein IMPACT	IMPACT	106905	127782	80220.6	128515	128496	135176	81049.2	107095	106601
Q9P2X0	Dolichol-phosphate mannosyltransferase subunit 3	DPM3	714422	764634	791874	799609	831642	780508	749113	732186	757965
Q9P2W9	Syntaxin-18	STX18	166430	168648	152045	161284	183996	159229	169787	170373	176405
Q9P2W1	Homologous-pairing protein 2 homolog	PSMC3IP	52692.7	58664.7	74498	53067.5	81750.8	70321.2	59790.3	73583.9	83946.7
Q9P2T1	GMP reductase 2	GMPR2	530054	555169	543337	538577	649803	640573	627520	648480	663233
Q9P2S5	WD repeat-containing protein WRAP73	WRAP73	85875.9	91564.6	115592	98513.5	110076	110020	101315	138060	124615
Q9P2R7	Succinate--CoA ligase [ADP-forming] subunit beta, mitochondrial	SUCLA2	1.83929e+06	2.10786e+06	2.32876e+06	2503931	2.61208e+06	2292947	2.15435e+06	2.14562e+06	2043427
Q9P2R3	Rabankyrin-5	ANKFY1	212396	209254	248497	263029	269993	264071	217231	268632	272349
Q9P2N5	RNA-binding protein 27	RBM27	380902	401342	362687	328840	349467	377317	361669	380358	343368
Q9P2M7	Cingulin	CGN	85390.2	89916.5	99666	100819	108937	107991	88219.6	106626	93876.2
Q9P2K8	eIF-2-alpha kinase GCN2	EIF2AK4	150982	150128	119059	132810	138666	128093	182586	149004	175060
Q9P2K6	Kelch-like protein 42	KLHL42	53170.5	49783.4	49129.6	59217.6	45676.3	46832.6	68116.7	54637.2	64302.3
Q9P2K3	REST corepressor 3	RCOR3	196802	204510	165069	201192	196809	227807	254786	244658	245300
Q9P2J8	Zinc finger protein 624	ZNF624	12852.1	8535.82	11955.9	17374.5	12869.9	11333.1	9052.93	11252.5	10279.5
Q9P2J5	Leucine--tRNA ligase, cytoplasmic	LARS1	1.38928e+06	1.38498e+06	1.61402e+06	1645711	1.63757e+06	1.54122e+06	1.76555e+06	1.87764e+06	1662835
Q9P2J3;Q9P2N7	Kelch-like protein 9;Kelch-like protein 13	KLHL9	100045	115242	97349.8	123058	105083	102691	110765	110844	118758
Q9P2I0	Cleavage and polyadenylation specificity factor subunit 2	CPSF2	765755	478494	788245	844597	847653	853819	787056	800815	829294
Q9P2F8	Signal-induced proliferation-associated 1-like protein 2	SIPA1L2	98897.2	103703	90181.8	116870	131990	129407	116567	144387	111484
Q9P2E9	Ribosome-binding protein 1	RRBP1	1.24152e+06	1.21871e+06	1.10772e+06	1.60518e+06	1.5691e+06	1.59727e+06	1.78075e+06	1.77489e+06	1.85004e+06
Q9P2E3	NFX1-type zinc finger-containing protein 1	ZNFX1	77823.3	68258.3	84620.6	86383	89885	84087.8	74213.1	94131.4	84678.4
Q9P2D1	Chromodomain-helicase-DNA-binding protein 7	CHD7	149164	163920	146223	186353	184158	157650	132578	142548	129787
Q9P2D0	Inhibitor of Bruton tyrosine kinase	IBTK	12574.1	15690.8	7881.42	17949.5	23801.4	17210.8	20414.5	22919.1	18958.4
Q9P2B4	CTTNBP2 N-terminal-like protein	CTTNBP2NL	138869	134722	152999	140257	163423	128131	143899	135647	144690
Q9P2B2	Prostaglandin F2 receptor negative regulator	PTGFRN	372220	388528	451538	388347	404314	444374	504241	545993	517986
Q9P289	Serine/threonine-protein kinase 26	STK26	572959	577699	624474	576489	608845	601030	628961	640584	628709
Q9P287	BRCA2 and CDKN1A-interacting protein	BCCIP	1.17579e+06	1215708	1.26609e+06	1.13054e+06	1.29067e+06	1.11107e+06	972524	968489	992832
Q9P275	Ubiquitin carboxyl-terminal hydrolase 36	USP36	202563	190308	232189	197133	197309	233083	149145	181583	144942
Q9P270	SLAIN motif-containing protein 2	SLAIN2	334378	331261	406360	379620	400088	374364	315134	335928	318292
Q9P265	Disco-interacting protein 2 homolog B	DIP2B	265502	285681	346554	263898	246002	286114	226223	284004	220273
Q9P260	RAB11-binding protein RELCH	RELCH	686391	685946	252867	727672	341735	794626	756075	230637	643041
Q9P258	Protein RCC2	RCC2	3.60996e+06	3.46196e+06	3.83704e+06	3541866	3.62517e+06	3.65266e+06	3.66078e+06	3960938	3895120
Q9P253	Vacuolar protein sorting-associated protein 18 homolog	VPS18	174120	175533	206607	242350	227210	222468	218683	220851	218482
Q9P246	Stromal interaction molecule 2	STIM2	144666	150666	175342	187438	204464	179180	149764	136234	169308
Q9P215	Pogo transposable element with KRAB domain	POGK	39785.1	25036.2	46178.2	36393.1	57746.8	37190.9	31633.8	32958.6	40198.5
Q9P206	Uncharacterized protein KIAA1522	KIAA1522	124616	113448	183366	135187	181577	160317	172950	193193	164747
Q9P1Y6	PHD and RING finger domain-containing protein 1	PHRF1	167257	175084	207146	220464	208794	193321	142756	167853	135247
Q9P1Y5	Calmodulin-regulated spectrin-associated protein 3	CAMSAP3	120563	130156	150039	168990	162795	140106	129933	130240	116555
Q9P1U1	Actin-related protein 3B	ACTR3B	34508.3	31063.8	42345.6	32254.3	41500.1	36763.4	26495.4	20167.9	37488.1
Q9P1U0	DNA-directed RNA polymerase I subunit RPA12	POLR1H	8861.74	12708.9	9166.49	27570.5	7789.5	3658.31	8754.88	7361.58	4999.25
Q9P1Q0	Vacuolar protein sorting-associated protein 54	VPS54	33488.3	12241.9	32768.9	23084.4	38578	34149.3	5991.24	26173.2	42582.4
Q9P1F3	Costars family protein ABRACL	ABRACL	629636	522399	104169	315964	178052	222613	591526	372158	631840
Q9P107	GEM-interacting protein	GMIP	188842	178596	194378	180830	182691	169838	151223	156313	173274
Q9P0V9	Septin-10	SEPTIN10	350902	389633	371041	368670	378412	348032	415211	414142	383233
Q9P0V3	SH3 domain-binding protein 4	SH3BP4	309202	325982	354307	436833	399897	358246	302592	356497	318885
Q9P0U4	CXXC-type zinc finger protein 1	CXXC1	65962.2	63252.2	61147.6	55056.7	60985.8	52317.6	57733.3	56881.4	57100
Q9P0T7	Proton-transporting V-type ATPase complex assembly regulator TMEM9	TMEM9	240135	203357	251378	313813	359278	285911	378108	340914	355994
Q9P0S9	Transmembrane protein 14C	TMEM14C	391263	384617	404693	544562	338514	422277	401287	597976	550359
Q9P0S2	Cytochrome c oxidase assembly protein COX16 homolog, mitochondrial	COX16	192320	186625	215789	168321	198147	120521	237752	246668	238584
Q9P0R6	GSK3B-interacting protein	GSKIP	229547	209765	260580	264599	300690	292997	262177	273425	292545
Q9P0P0	E3 ubiquitin-protein ligase RNF181	RNF181	240035	261166	263021	316109	310543	323158	309147	287238	295223
Q9P0M9	39S ribosomal protein L27, mitochondrial	MRPL27	419963	427351	467079	462937	459154	450515	359008	410425	403863
Q9P0M6	Core histone macro-H2A.2	MACROH2A2	356050	387497	391527	347484	438489	411169	421246	374045	373229
Q9P0L0	Vesicle-associated membrane protein-associated protein A	VAPA	5228372	5.13021e+06	5.19877e+06	5338871	5.50858e+06	4.97131e+06	5.55497e+06	5.46348e+06	5.39316e+06
Q9P0J7	E3 ubiquitin-protein ligase KCMF1	KCMF1	145264	147001	158287	154709	159242	167206	143345	146299	141343
Q9P0J1	[Pyruvate dehydrogenase [acetyl-transferring]]-phosphatase 1, mitochondrial	PDP1	450224	347677	422950	422898	391648	347055	434735	517464	471997
Q9P0J0	NADH dehydrogenase [ubiquinone] 1 alpha subcomplex subunit 13	NDUFA13	773479	780872	625037	767381	735237	736281	826395	841493	844074
Q9P0I2	ER membrane protein complex subunit 3	EMC3	747671	726973	720227	806896	800679	756149	757378	784000	768960
Q9P035	Very-long-chain (3R)-3-hydroxyacyl-CoA dehydratase 3	HACD3	2.7247e+06	2.6373e+06	2.65231e+06	2.74368e+06	2.64134e+06	2.7287e+06	2572870	2.64164e+06	2.5285e+06
Q9P032	NADH dehydrogenase [ubiquinone] 1 alpha subcomplex assembly factor 4	NDUFAF4	723813	891772	779538	969893	994111	981719	638738	679145	523950
Q9P031	Thyroid transcription factor 1-associated protein 26	CCDC59	168315	184759	205041	164775	185236	202732	124522	138853	143338
Q9P021	Cysteine-rich PDZ-binding protein	CRIPT	245930	254179	307465	361287	387209	403562	284052	301385	300380
Q9P016	Thymocyte nuclear protein 1	THYN1	218598	232221	239726	295358	308407	291583	329321	344270	311120
Q9P015	39S ribosomal protein L15, mitochondrial	MRPL15	320295	322563	422325	432061	370101	371886	329572	318703	207490
Q9P013	Spliceosome-associated protein CWC15 homolog	CWC15	322349	329533	366840	341966	367249	387001	352944	357264	366800
Q9P003	Protein cornichon homolog 4	CNIH4	153441	194879	137556	227604	138176	146076	172169	194013	175296
Q9P000	COMM domain-containing protein 9	COMMD9	188599	193200	166645	165190	162469	171502	224030	212907	227463
Q9NZZ3	Charged multivesicular body protein 5	CHMP5	691836	623937	844576	989317	1.00534e+06	943096	689382	753464	652379
Q9NZW5	MAGUK p55 subfamily member 6	PALS2	378394	366411	378784	345987	346063	332749	330180	338475	335041
Q9NZU5	LIM and cysteine-rich domains protein 1	LMCD1	114714	116497	124305	132075	141198	133256	139605	132029	132683
Q9NZT2	Opioid growth factor receptor	OGFR	154006	159651	191113	229897	264914	243442	174941	177592	156074
Q9NZR1	Tropomodulin-2	TMOD2	77574.7	67095.8	76363.3	61923.1	74565.3	109358	69946.8	94808	87397.8
Q9NZQ3	NCK-interacting protein with SH3 domain	NCKIPSD	143752	138314	90167	129289	113784	107824	145878	141150	163309
Q9NZN8	CCR4-NOT transcription complex subunit 2	CNOT2	486936	488796	560542	529764	584745	483777	421965	471624	455828
Q9NZN5	Rho guanine nucleotide exchange factor 12	ARHGEF12	188210	215804	228170	242853	231074	232131	255539	259564	222134
Q9NZN3	EH domain-containing protein 3	EHD3	646703	651389	651301	708392	736584	669224	627681	629705	606955
Q9NZM5	Ribosome biogenesis protein NOP53	NOP53	1.69887e+06	1.89602e+06	2.13223e+06	1.75893e+06	1.82426e+06	1.89076e+06	1.80621e+06	1878924	1.926e+06
Q9NZM3	Intersectin-2	ITSN2	96318.3	86513.6	97442.5	115811	122128	103333	108752	118963	108118
Q9NZM1	Myoferlin	MYOF	1.44545e+06	1.42163e+06	1661105	1.87018e+06	1.84418e+06	1.708e+06	1.29187e+06	1.41918e+06	1.31769e+06
Q9NZL9	Methionine adenosyltransferase 2 subunit beta	MAT2B	1.80061e+06	1.69875e+06	1.79641e+06	1.87606e+06	1.8039e+06	1.71628e+06	1.73314e+06	1798801	1.78217e+06
Q9NZL4	Hsp70-binding protein 1	HSPBP1	1.32988e+06	1.43776e+06	1.19644e+06	1.37111e+06	1.2872e+06	1.34263e+06	1.17803e+06	1.18401e+06	1.3196e+06
Q9NZJ9	Diphosphoinositol polyphosphate phosphohydrolase 2	NUDT4	783140	785650	748595	790875	780106	849144	680303	672062	653499
Q9NZJ7	Mitochondrial carrier homolog 1	MTCH1	321842	303959	361092	383837	393183	371297	326193	326100	320536
Q9NZJ6	Ubiquinone biosynthesis O-methyltransferase, mitochondrial	COQ3	153971	156644	139271	162362	182878	184254	176283	167589	185633
Q9NZJ0	Denticleless protein homolog	DTL	11582.9	13993.5	17074.8	17801.6	15462	14043.1	13099	14862.3	17165.7
Q9NZI7	Upstream-binding protein 1	UBP1	189507	203316	200317	189874	193847	198578	188505	204790	207646
Q9NZE8	39S ribosomal protein L35, mitochondrial	MRPL35	222371	215496	234790	182795	202530	217822	202355	178942	213302
Q9NZD8	Maspardin	SPG21	239990	249398	230109	270316	255125	244769	275532	240760	249333
Q9NZD2	Glycolipid transfer protein	GLTP	278967	269564	244132	227493	289048	258407	334711	322310	305920
Q9NZC4	ETS homologous factor	EHF	67731.1	64070.6	55423.9	62188.7	61934	66285.9	79649.4	67110	93113.3
Q9NZC3	Glycerophosphodiester phosphodiesterase 1	GDE1	243019	251198	254253	274434	281371	272621	299877	268458	254986
Q9NZB2	Constitutive coactivator of PPAR-gamma-like protein 1	FAM120A	980786	906438	1107034	1.25272e+06	1.22115e+06	1.18645e+06	929473	1.02968e+06	900049
Q9NZ63	Telomere length and silencing protein 1 homolog	C9orf78	335186	331846	353322	328556	318578	322543	296779	288607	273692
Q9NZ52	ADP-ribosylation factor-binding protein GGA3	GGA3	246081	215112	328492	199109	349262	306266	192315	229986	219857
Q9NZ45	CDGSH iron-sulfur domain-containing protein 1	CISD1	265682	263233	254089	321716	301859	280329	446315	415833	457252
Q9NZ43	Vesicle transport protein USE1	USE1	53161.9	52981.4	53883.2	58912.8	56769.9	51866.5	56440.7	54907.7	62856.8
Q9NZ42	Gamma-secretase subunit PEN-2	PSENEN	298721	317550	383382	263861	471994	392258	271051	317104	287681
Q9NZ32	Actin-related protein 10	ACTR10	378289	355354	342547	359014	362464	369545	369585	386937	369307
Q9NZ08	Endoplasmic reticulum aminopeptidase 1	ERAP1	226415	227902	146534	297564	252432	267050	280953	265557	288503
Q9NZ01	Very-long-chain enoyl-CoA reductase	TECR	1842234	1.84459e+06	1.5399e+06	1.8101e+06	1.62975e+06	1.66664e+06	1.96229e+06	1863047	1.93615e+06
Q9NYZ3	G2 and S phase-expressed protein 1	GTSE1	29884.1	66631.4	111804	114288	93680.3	110436	114375	89162.9	117045
Q9NYY8	FAST kinase domain-containing protein 2, mitochondrial	FASTKD2	375021	367416	386622	301321	341595	334850	323213	280008	286310
Q9NYV4	Cyclin-dependent kinase 12	CDK12	105400	106496	114157	95853.5	91683.3	100884	101893	91190.2	98415.4
Q9NYU2	UDP-glucose:glycoprotein glucosyltransferase 1	UGGT1	880922	818457	958226	1.09258e+06	1.14755e+06	1.01433e+06	1.05136e+06	1.09654e+06	1.01346e+06
Q9NYT0	Pleckstrin-2	PLEK2	128946	154550	159016	139222	120570	128231	143034	116448	131454
Q9NYR9	NF-kappa-B inhibitor-interacting Ras-like protein 2	NKIRAS2	35977.2	34011.4	10203.7	36549.4	25584.2	25961.8	42480.4	34079.8	41470.4
Q9NYP3	Protein downstream neighbor of Son	DONSON	36929.7	33299	28420	41097.2	46311.7	39135.6	42256.7	46075.6	43940.5
Q9NYM9	BET1-like protein	BET1L	178359	170550	200712	175449	196332	199726	146370	169034	128283
Q9NYL9	Tropomodulin-3	TMOD3	1.46209e+06	1.49536e+06	1.50298e+06	1.55227e+06	1.63299e+06	1.52306e+06	1.73463e+06	1.64925e+06	1.5761e+06
Q9NYL4	Peptidyl-prolyl cis-trans isomerase FKBP11	FKBP11	486995	479777	495873	467050	522052	496130	475922	477947	465734
Q9NYL2	Mitogen-activated protein kinase kinase kinase 20	MAP3K20	308173	295152	350120	273764	291606	330324	248764	268526	260890
Q9NYK5	39S ribosomal protein L39, mitochondrial	MRPL39	514240	498801	477692	485138	484054	503517	468785	492300	479351
Q9NYJ1	Cytochrome c oxidase assembly factor 4 homolog, mitochondrial	COA4	202049	169422	232167	210582	220279	208685	231470	213318	206156
Q9NYH9	U3 small nucleolar RNA-associated protein 6 homolog	UTP6	627507	617425	707650	634479	643269	628520	489284	512367	497314
Q9NYG2	Palmitoyltransferase ZDHHC3	ZDHHC3	154453	161936	151734	145069	156719	147342	160420	179156	157530
Q9NYF8	Bcl-2-associated transcription factor 1	BCLAF1	1.72575e+06	1.8048e+06	1983094	1.67012e+06	1.80055e+06	1812918	1.756e+06	1777578	1.78244e+06
Q9NYB9	Abl interactor 2	ABI2	99480.6	115599	121517	99443.9	116110	115183	78304.8	77218.9	106735
Q9NYB0	Telomeric repeat-binding factor 2-interacting protein 1	TERF2IP	188698	179268	176869	128928	189649	187553	165169	157681	154841
Q9NY97	N-acetyllactosaminide beta-1,3-N-acetylglucosaminyltransferase 2	B3GNT2	40465	49270.5	56646.2	60099.1	47136.3	57551.4	44080.7	36950.5	59691.7
Q9NY93	Probable ATP-dependent RNA helicase DDX56	DDX56	507128	504125	640363	497320	543311	499746	436887	483337	456846
Q9NY61	Protein AATF	AATF	320794	324715	223096	267329	260922	289575	243664	258143	261592
Q9NY35	Claudin domain-containing protein 1	CLDND1	94428.2	103629	115874	145004	144911	152641	108910	128690	119437
Q9NY33	Dipeptidyl peptidase 3	DPP3	1.72539e+06	1.76401e+06	2.09035e+06	1.86652e+06	2.0324e+06	1.8212e+06	1706426	1.81706e+06	1.71423e+06
Q9NY27	Serine/threonine-protein phosphatase 4 regulatory subunit 2	PPP4R2	650829	659620	794093	674406	703039	679089	599962	655382	637064
Q9NY12	H/ACA ribonucleoprotein complex subunit 1	GAR1	1.94089e+06	2022659	2.25585e+06	1.91858e+06	2.0377e+06	2.01181e+06	1.89719e+06	1.97083e+06	1.93878e+06
Q9NXX6	Non-structural maintenance of chromosomes element 4 homolog A	NSMCE4A	191563	206979	205421	231541	198284	235733	201793	219469	185420
Q9NXW9	Alpha-ketoglutarate-dependent dioxygenase alkB homolog 4	ALKBH4	23157.4	26953	34258.1	14328.1	35128.5	46798.2	15800.4	39136.6	35264.2
Q9NXW2	DnaJ homolog subfamily B member 12	DNAJB12	281306	280852	343594	303260	320219	314255	205977	212156	208030
Q9NXV6	CDKN2A-interacting protein	CDKN2AIP	904263	1.02789e+06	1.16063e+06	886937	1.13704e+06	1134293	988182	907406	859654
Q9NXV2	BTB/POZ domain-containing protein KCTD5	KCTD5	36198.5	37540.1	30799.4	56964.3	35800.3	35889.2	50962.7	50886.1	48944.9
Q9NXS2	Glutaminyl-peptide cyclotransferase-like protein	QPCTL	267048	260867	276911	331222	332663	308976	324776	334886	317424
Q9NXR7	BRISC and BRCA1-A complex member 2	BABAM2	217254	207343	211660	234087	233194	249187	250152	250472	251219
Q9NXN4	Ganglioside-induced differentiation-associated protein 2	GDAP2	22268.6	24219.6	20993.1	41309.8	12138.7	11806	11843.7	20629.3	34714.2
Q9NXK8	F-box/LRR-repeat protein 12	FBXL12	30730.6	67757.4	83146	71045.8	52340.6	78592.3	40972.4	51572.6	49620.7
Q9NXH9	tRNA (guanine(26)-N(2))-dimethyltransferase	TRMT1	709042	676721	512631	649319	567893	599320	584134	593230	604362
Q9NXH8	Torsin-4A	TOR4A	44470.1	56783.5	75434.6	90676.5	77159.2	70689	65146.1	83218.3	68512.1
Q9NXG6	Transmembrane prolyl 4-hydroxylase	P4HTM	92796.7	61915.6	111589	118658	131557	120737	96838.9	83700.9	103041
Q9NXG2	THUMP domain-containing protein 1	THUMPD1	948305	904826	918910	924972	929094	896225	965935	969769	990440
Q9NXF7	DDB1- and CUL4-associated factor 16	DCAF16	184132	177370	190159	145605	169968	159908	171682	169401	178734
Q9NXF1	Testis-expressed protein 10	TEX10	588883	596152	583975	537034	525943	565080	508513	534386	494474
Q9NXE8	Pre-mRNA-splicing factor CWC25 homolog	CWC25	43021.2	50652.6	45115.3	54026.8	52330	51285.2	47279.8	39932.1	39371.9
Q9NXE4	Sphingomyelin phosphodiesterase 4	SMPD4	406923	395973	348177	376723	363397	365213	367681	351863	374238
Q9NXC5	GATOR complex protein MIOS	MIOS	106422	110148	103571	103525	97780.6	101695	134064	142596	148772
Q9NX95	Syntabulin	SYBU	49635.9	48263.6	46016.4	69320.5	62610.1	60592.6	70419	73399.6	72655.3
Q9NX76	CKLF-like MARVEL transmembrane domain-containing protein 6	CMTM6	387151	395921	461640	362763	417338	449199	379021	425577	418555
Q9NX74	tRNA-dihydrouridine(20) synthase [NAD(P)+]-like	DUS2	125917	135001	105884	151413	122956	134398	120934	123719	126204
Q9NX70	Mediator of RNA polymerase II transcription subunit 29	MED29	64769.7	60848.7	70886.1	51241.6	74569	64800.4	60986.3	49977.7	56541.7
Q9NX63	MICOS complex subunit MIC19	CHCHD3	1.5158e+06	1.47453e+06	1.78561e+06	1.5827e+06	1.67574e+06	1.59927e+06	1.4616e+06	1530307	1499107
Q9NX62	Golgi-resident adenosine 3',5'-bisphosphate 3'-phosphatase	BPNT2	722565	755078	728334	788833	764688	717423	799621	757242	812851
Q9NX61	Transmembrane protein 161A	TMEM161A	42022	41805.3	29548.9	51908.2	33483.6	31978.5	51892	39423.2	40767.9
Q9NX58	Cell growth-regulating nucleolar protein	LYAR	1.0289e+06	992175	918835	857299	848933	951402	739628	786337	755759
Q9NX57	Ras-related protein Rab-20	RAB20	242852	214585	233909	223694	227869	232772	240616	241025	238727
Q9NX55	Huntingtin-interacting protein K	HYPK	270912	272955	292130	227009	248977	249436	224784	261664	247172
Q9NX47	E3 ubiquitin-protein ligase MARCHF5	MARCHF5	282889	285908	304768	335885	331192	291699	314975	328011	327669
Q9NX46	ADP-ribose glycohydrolase ARH3	ADPRS	588576	583887	707657	612049	680663	627520	591323	646733	578424
Q9NX40	OCIA domain-containing protein 1	OCIAD1	873892	881150	972402	1.01124e+06	1.15268e+06	1093068	1.03969e+06	1.08323e+06	1080319
Q9NX38	Protein Abitram	ABITRAM	87724.3	100016	135026	107757	106252	115033	85435.2	111483	99561
Q9NX24	H/ACA ribonucleoprotein complex subunit 2	NHP2	1083870	1.07587e+06	1.29409e+06	1.13043e+06	1.09759e+06	1.06175e+06	1.00876e+06	1093965	1.04843e+06
Q9NX20	39S ribosomal protein L16, mitochondrial	MRPL16	340958	337341	352412	344834	347936	361050	312043	319573	310968
Q9NX14	NADH dehydrogenase [ubiquinone] 1 beta subcomplex subunit 11, mitochondrial	NDUFB11	1.06699e+06	1.14587e+06	1.27326e+06	1.30012e+06	1.27504e+06	1.45251e+06	1.23892e+06	1.29306e+06	1305234
Q9NX08	COMM domain-containing protein 8	COMMD8	321439	332755	324834	342492	367427	370049	299877	316994	314883
Q9NX05	Constitutive coactivator of PPAR-gamma-like protein 2	FAM120C	23816.4	25683.6	28733.4	42083	26921.4	21739.1	28032.1	25903.2	23706.8
Q9NX04	Uncharacterized protein C1orf109	C1orf109	130960	127305	156834	104214	124627	134632	123077	134655	129350
Q9NX02	NACHT, LRR and PYD domains-containing protein 2	NLRP2	653216	655685	673270	542705	702892	627603	517042	602574	406697
Q9NX01	Thioredoxin-like protein 4B	TXNL4B	80690.6	81988.4	94002.7	121346	110581	110131	102515	97152.7	92535.2
Q9NX00	Transmembrane protein 160	TMEM160	188334	191348	157189	183243	179027	175845	198416	186602	186255
Q9NWZ5	Uridine-cytidine kinase-like 1	UCKL1	65274.9	61400.8	72486.9	66501.4	71234	68031.9	57937.2	66313.8	62746.3
Q9NWZ3	Interleukin-1 receptor-associated kinase 4	IRAK4	73898.4	72343.5	76576.5	104198	82400.6	87911.5	71403.4	75796.2	62565
Q9NWY4	Histone PARylation factor 1	HPF1	418000	418825	452603	444712	467933	434951	488900	509618	479106
Q9NWX6	Probable tRNA(His) guanylyltransferase	THG1L	398791	390695	373670	296105	330461	324205	316334	335124	322843
Q9NWW5	Ceroid-lipofuscinosis neuronal protein 6	CLN6	181344	187652	146674	212959	156680	142357	143741	146916	152856
Q9NWV8	BRISC and BRCA1-A complex member 1	BABAM1	160797	155879	276322	227082	208661	224282	178086	208342	244962
Q9NWV4	CXXC motif containing zinc binding protein	CZIB	445624	446896	407927	493234	464115	444830	468217	471240	437857
Q9NWU5	39S ribosomal protein L22, mitochondrial	MRPL22	544483	520936	589009	555030	569602	579931	470969	540480	512364
Q9NWU2	Glucose-induced degradation protein 8 homolog	GID8	292728	289160	212957	293791	238060	246044	275873	231180	269799
Q9NWU1	3-oxoacyl-[acyl-carrier-protein] synthase, mitochondrial	OXSM	295940	290444	329613	305475	300093	314620	343099	316390	310478
Q9NWT8	Aurora kinase A-interacting protein	AURKAIP1	429126	401553	452316	400090	409579	510614	342448	366822	346079
Q9NWT6	Hypoxia-inducible factor 1-alpha inhibitor	HIF1AN	365120	376644	488963	421810	444539	454992	400430	444977	438579
Q9NWT1	p21-activated protein kinase-interacting protein 1	PAK1IP1	463746	456946	612877	472161	528521	532430	458101	409252	425140
Q9NWS8	Required for meiotic nuclear division protein 1 homolog	RMND1	198992	218022	197693	211492	195796	195613	247329	253752	244666
Q9NWS0	PIH1 domain-containing protein 1	PIH1D1	702969	738429	734657	678451	696153	674691	713034	676135	683827
Q9NWQ9	Uncharacterized protein C14orf119	C14orf119	53733	81686.8	100549	184621	203872	137405	56187.6	85533.5	114374
Q9NWM8	Peptidyl-prolyl cis-trans isomerase FKBP14	FKBP14	13529.4	5106.42	10584.8	15198.6	26158.2	9922.4	3430.93	4975.05	7333.6
Q9NWK9	Box C/D snoRNA protein 1	ZNHIT6	133734	114941	157019	128730	152843	140356	101440	131135	113507
Q9NWH9	SAFB-like transcription modulator	SLTM	726316	723569	935002	745202	777419	855857	695331	732095	751513
Q9NWB7	Intraflagellar transport protein 57 homolog	IFT57	83704	52313	73194.1	52218.1	59372.9	64603.5	76334.5	114017	108158
Q9NWB6	Arginine and glutamate-rich protein 1	ARGLU1	560801	600440	575304	551233	568350	558088	582026	648986	654150
Q9NWA0	Mediator of RNA polymerase II transcription subunit 9	MED9	51142.9	54169.6	45773.1	89125.5	79364.7	55454.1	24811.8	39648	25435.6
Q9NW97	Transmembrane protein 51	TMEM51	78611.4	87676	95363.2	111570	110760	110810	98249.5	108984	107845
Q9NW82	WD repeat-containing protein 70	WDR70	170588	181740	207316	213964	218015	201884	180404	199104	177970
Q9NW81	Distal membrane-arm assembly complex protein 2	DMAC2	105991	112026	111543	96673.8	107946	119183	85292.8	115010	107358
Q9NW68	BSD domain-containing protein 1	BSDC1	57787.3	55179.8	73885.1	70712.2	75672.2	73366.6	69885.2	71842.8	76476.3
Q9NW64	Pre-mRNA-splicing factor RBM22	RBM22	700946	713734	787692	773380	754056	831018	652668	710679	723026
Q9NW15	Anoctamin-10	ANO10	116714	114413	102320	141464	132464	131444	143173	125284	131809
Q9NW13	RNA-binding protein 28	RBM28	705866	710917	832647	752250	716900	707223	496753	558857	529568
Q9NW08	DNA-directed RNA polymerase III subunit RPC2	POLR3B	57959.4	45048.7	53376.6	86913.4	74757.4	90809.7	247969	70262.4	84910.3
Q9NVZ3	Adaptin ear-binding coat-associated protein 2	NECAP2	154170	150447	148224	165959	262906	159296	157756	170982	179133
Q9NVX2	Notchless protein homolog 1	NLE1	362803	353317	384948	365378	347075	354343	251036	284889	263050
Q9NVX0	HAUS augmin-like complex subunit 2	HAUS2	103738	125130	141011	121001	121686	110461	111293	138031	114889
Q9NVV5	Androgen-induced gene 1 protein	AIG1	116756	127883	145310	149575	30957.5	141465	138590	159065	143022
Q9NVV4	Poly(A) RNA polymerase, mitochondrial	MTPAP	336373	302884	413288	331506	309267	338385	333471	341795	319985
Q9NVV0	Trimeric intracellular cation channel type B	TMEM38B	224486	212638	229323	242052	208016	248567	219260	260260	255703
Q9NVU7	Protein SDA1 homolog	SDAD1	598494	622469	598495	661790	551111	603027	507587	545514	530574
Q9NVU0	DNA-directed RNA polymerase III subunit RPC5	POLR3E	24889.1	26749.3	28392.8	19893.5	22874.1	27097.7	24136.2	27317.4	21577.3
Q9NVT9	Armadillo repeat-containing protein 1	ARMC1	428903	354179	488335	447875	482757	450834	442144	458020	433275
Q9NVS9	Pyridoxine-5'-phosphate oxidase	PNPO	396454	394259	400203	413727	412287	376100	421910	447609	419345
Q9NVS2	39S ribosomal protein S18a, mitochondrial	MRPS18A	506929	532064	601374	542094	595648	512418	458273	460004	439513
Q9NVR2	Integrator complex subunit 10	INTS10	128663	132301	122205	120438	119079	118233	123782	126982	121121
Q9NVQ4	Fas apoptotic inhibitory molecule 1	FAIM	146936	161279	174540	142865	171825	168022	137655	159293	150920
Q9NVP2	Histone chaperone ASF1B	ASF1B	804171	796392	897187	876314	943337	962114	945981	1.03422e+06	988346
Q9NVP1	ATP-dependent RNA helicase DDX18	DDX18	1.86692e+06	1.80022e+06	2.04419e+06	1.7514e+06	1.78336e+06	1.82098e+06	1.39558e+06	1.43151e+06	1.37212e+06
Q9NVN8	Guanine nucleotide-binding protein-like 3-like protein	GNL3L	193300	195182	280678	297379	293051	297691	190891	203032	194090
Q9NVN3	Synembryn-B	RIC8B	65296.6	69393.4	57081.4	38365.5	43053.7	41500.8	39427.3	34236.2	40352
Q9NVM9	Integrator complex subunit 13	INTS13	213009	210332	230371	288380	253872	228632	225957	247128	230804
Q9NVM6	DnaJ homolog subfamily C member 17	DNAJC17	459926	484378	539102	497603	505506	498259	482533	527849	507627
Q9NVM4	Protein arginine N-methyltransferase 7	PRMT7	53562.9	41139.4	41823.5	39485.8	61665.3	81643.1	30550.1	39345	37378.5
Q9NVJ2	ADP-ribosylation factor-like protein 8B	ARL8B	906936	899039	1019539	1.00291e+06	1.11952e+06	1.06509e+06	1.03741e+06	1.02078e+06	1.03479e+06
Q9NVI7	ATPase family AAA domain-containing protein 3A	ATAD3A	2.41455e+06	2.37847e+06	2.00036e+06	2.3609e+06	2.10148e+06	2.05634e+06	2.46415e+06	2.33771e+06	2.50039e+06
Q9NVI1	Fanconi anemia group I protein	FANCI	1.99995e+06	978807	1103872	1.35717e+06	1.25283e+06	2.15358e+06	253512	1.95421e+06	629114
Q9NVH2	Integrator complex subunit 7	INTS7	170740	160884	178694	182042	172065	176435	150736	170564	148775
Q9NVH1	DnaJ homolog subfamily C member 11	DNAJC11	593874	588229	701667	678475	642362	641415	567491	605106	567877
Q9NVH0	Exonuclease 3'-5' domain-containing protein 2	EXD2	88525.3	80496.2	60829.8	102416	94530.8	75676.9	123309	119524	118760
Q9NVG8	TBC1 domain family member 13	TBC1D13	139022	134379	69894.7	132277	105688	100519	147457	131264	153373
Q9NVF7	F-box only protein 28	FBXO28	1433.05	2889.75	20054.2	37678.3	22242.1	24221.9	2200.62	14419.8	7267.56
Q9NVE7	4'-phosphopantetheine phosphatase	PANK4	247747	302244	318485	320883	252458	314101	280785	319369	285531
Q9NVD7	Alpha-parvin	PARVA	663995	657123	762851	686226	756814	769355	575367	656943	619916
Q9NVC6	Mediator of RNA polymerase II transcription subunit 17	MED17	177747	178712	155973	171164	176838	177753	178972	181688	191332
Q9NVC3	Putative sodium-coupled neutral amino acid transporter 7	SLC38A7	133750	147537	184631	158386	161891	117104	149775	137439	142277
Q9NVA4	Transmembrane protein 184C	TMEM184C	49944	64358.5	84911.5	61674.6	72303.9	75012.1	53332.5	72276.8	64454.9
Q9NVA2	Septin-11	SEPTIN11	1.06019e+06	1.12445e+06	1.21261e+06	1.08792e+06	1.13274e+06	1.10109e+06	1.14526e+06	1.21393e+06	1.16225e+06
Q9NVA1	Ubiquinol-cytochrome-c reductase complex assembly factor 1	UQCC1	208129	203639	169639	231755	194875	190924	216432	198807	198928
Q9NV96	Cell cycle control protein 50A	TMEM30A	269534	269831	331907	277111	337957	323060	307937	351844	337672
Q9NV92	NEDD4 family-interacting protein 2	NDFIP2	37635.4	45346.9	42473.5	84719	92659.5	77286.8	65407.7	70566.3	62797.4
Q9NV88	Integrator complex subunit 9	INTS9	100588	98057.4	89811.2	127166	113064	107405	88837.8	99954.9	84158.6
Q9NV70	Exocyst complex component 1	EXOC1	141834	168094	169652	162995	170578	174380	176795	191726	192199
Q9NV56	MRG/MORF4L-binding protein	MRGBP	274202	261615	116782	197616	149174	179563	229909	215437	245194
Q9NV35	Nucleotide triphosphate diphosphatase NUDT15	NUDT15	239920	222259	202031	215211	169217	179918	210366	192380	201542
Q9NV31	U3 small nucleolar ribonucleoprotein protein IMP3	IMP3	1.20956e+06	1.29613e+06	1.42535e+06	1.34477e+06	1.29938e+06	1.24731e+06	1.2011e+06	1.25293e+06	1.15166e+06
Q9NV06	DDB1- and CUL4-associated factor 13	DCAF13	587011	640622	626111	720589	661327	657722	561529	544282	531182
Q9NUX5	Protection of telomeres protein 1	POT1	27711.3	28572.9	47889.7	47441.3	51141.8	44254.1	25242.6	38668.4	31885.5
Q9NUW8	Tyrosyl-DNA phosphodiesterase 1	TDP1	201024	138247	151046	168556	126738	157682	65871.2	94592.5	80562
Q9NUU7	ATP-dependent RNA helicase DDX19A	DDX19A	213577	212419	295983	198861	232172	273852	186190	229558	217258
Q9NUT2	Mitochondrial potassium channel ATP-binding subunit	ABCB8	45320.1	38679.7	33180.5	38209.4	39735	34527.3	42036.3	38788.6	40584.7
Q9NUQ9	CYFIP-related Rac1 interactor B	CYRIB	1.99557e+06	2.10646e+06	1.91412e+06	2.00298e+06	1.86458e+06	2.04772e+06	2.06505e+06	1.96088e+06	2.04141e+06
Q9NUQ8	ATP-binding cassette sub-family F member 3	ABCF3	547691	526597	515162	533946	525818	517430	544235	541635	526188
Q9NUQ7	Ufm1-specific protease 2	UFSP2	275134	254347	239127	312398	297284	292169	262283	247298	278118
Q9NUQ6	SPATS2-like protein	SPATS2L	184171	285388	341414	346561	373624	375436	217789	226454	234814
Q9NUQ3	Gamma-taxilin	TXLNG	373756	374279	391190	347027	379478	369057	306913	369311	362837
Q9NUQ2	1-acyl-sn-glycerol-3-phosphate acyltransferase epsilon	AGPAT5	272497	287320	335001	278261	274535	286193	265201	283109	246166
Q9NUP9	Protein lin-7 homolog C	LIN7C	579126	594920	701399	675577	770660	742189	625282	665056	694957
Q9NUP7	tRNA:m(4)X modification enzyme TRM13 homolog	TRMT13	28225.3	25036.8	32463.3	36605.5	35881.9	29371.6	19985.2	16878.6	21560.4
Q9NUM4	Transmembrane protein 106B	TMEM106B	372634	403225	445967	565266	546871	562723	527256	536687	539672
Q9NUM3	Zinc transporter ZIP9	SLC39A9	18767.4	14078.5	10661	17038.5	20856.7	11954.2	15341.4	11752	13243.3
Q9NUL7	Probable ATP-dependent RNA helicase DDX28	DDX28	51111.8	46776.1	66672.4	49868.9	56994.9	52337.8	36482.9	42651.2	37430.1
Q9NUL5	Shiftless antiviral inhibitor of ribosomal frameshifting protein	SHFL	29435.1	34953.4	37623.2	41396.1	59975.2	53907.5	49762.5	68323.7	60985
Q9NUL3	Double-stranded RNA-binding protein Staufen homolog 2	STAU2	235564	236496	269758	251460	268870	265919	246365	286800	264290
Q9NUJ1	Mycophenolic acid acyl-glucuronide esterase, mitochondrial	ABHD10	902979	836482	919309	909928	919959	885647	971818	911635	978585
Q9NUI1	Peroxisomal 2,4-dienoyl-CoA reductase	DECR2	100233	96056.3	134059	138233	138667	131197	92262.5	132118	92299.8
Q9NUG6	p53 and DNA damage-regulated protein 1	PDRG1	227225	249405	295097	256649	240541	229128	243578	223710	229252
Q9NUD5	Zinc finger CCHC domain-containing protein 3	ZCCHC3	98258.5	95870.2	102592	92819.2	100891	104594	79706.7	90027.9	88100.8
Q9NUB1	Acetyl-coenzyme A synthetase 2-like, mitochondrial	ACSS1	44326.6	45771	57533.4	54703.5	73555.9	83184	47313.7	47610.1	43387.2
Q9NU23	LYR motif-containing protein 2	LYRM2	79119.8	85766.5	85975.1	71251.9	62429.2	67019.9	73240.2	62058.2	69380
Q9NU22	Midasin	MDN1	2.67093e+06	2.5361e+06	3.10543e+06	2.27895e+06	64957.5	2.55957e+06	2.75681e+06	3228473	3.04374e+06
Q9NU02	Ankyrin repeat and EF-hand domain-containing protein 1	ANKEF1	330648	335277	386804	339844	358761	385353	344356	297065	353613
Q9NTZ6	RNA-binding protein 12	RBM12	2049373	2.21686e+06	2.37602e+06	2100532	2.1574e+06	2.15341e+06	1.72005e+06	1.80332e+06	1.76508e+06
Q9NTX5	Ethylmalonyl-CoA decarboxylase	ECHDC1	2193978	2210825	1.83492e+06	1.8545e+06	1925297	2150003	1.9464e+06	2.07386e+06	1999990
Q9NTM9	Copper homeostasis protein cutC homolog	CUTC	163540	166942	204572	182578	174652	180333	139841	162980	149537
Q9NTK5	Obg-like ATPase 1	OLA1	5386956	5278668	5724781	5.73545e+06	5712990	5.58404e+06	5476925	5532003	5.48456e+06
Q9NTJ5	Phosphatidylinositol-3-phosphatase SAC1	SACM1L	891523	893004	876576	916199	845670	907886	1.03061e+06	1.03899e+06	1.07814e+06
Q9NTJ4	Alpha-mannosidase 2C1	MAN2C1	31573666	31594542	35095032	23297658	28961290	28981592	28507386	31806034	29583424
Q9NTJ3	Structural maintenance of chromosomes protein 4	SMC4	757457	756065	881319	722382	803882	810284	624944	650090	608357
Q9NTI5	Sister chromatid cohesion protein PDS5 homolog B	PDS5B	178787	172157	160595	173933	174504	174255	162811	139843	153027
Q9NTG7	NAD-dependent protein deacetylase sirtuin-3, mitochondrial	SIRT3	101162	97710.4	32946.6	72969	62217.4	63119.4	111861	86992.8	124160
Q9NT62	Ubiquitin-like-conjugating enzyme ATG3	ATG3	752949	830200	839656	769789	805472	819779	827855	863812	805759
Q9NSY1	BMP-2-inducible protein kinase	BMP2K	120356	129825	146695	144840	165838	165830	141372	153533	144760
Q9NSV4	Protein diaphanous homolog 3	DIAPH3	207951	204967	208210	219946	238867	242679	209424	177423	139220
Q9NSP4	Centromere protein M	CENPM	113114	118437	110603	166641	157749	160652	109278	117879	113132
Q9NSK0	Kinesin light chain 4	KLC4	698258	687306	746175	772232	803998	762337	732065	742432	739961
Q9NSI6	Bromodomain and WD repeat-containing protein 1	BRWD1	37935.3	45648.3	30643.1	47354.2	42003.9	53294.7	38686.5	42009.6	44653.5
Q9NSI2	Protein FAM207A	SLX9	483179	484313	575325	522769	536100	510549	411015	426997	424476
Q9NSE4	Isoleucine--tRNA ligase, mitochondrial	IARS2	774304	852107	867526	757662	853878	804299	757912	826399	816550
Q9NSD9	Phenylalanine--tRNA ligase beta subunit	FARSB	2170072	2044956	2.73402e+06	2.14575e+06	2.34773e+06	2226248	1.87222e+06	2.24285e+06	2371319
Q9NSC5	Homer protein homolog 3	HOMER3	20485.6	21818.3	26554.4	22568.9	25421.8	21573.7	21322.1	18458.2	16191.8
Q9NSA3	Beta-catenin-interacting protein 1	CTNNBIP1	310320	341527	323549	360250	403329	308345	362914	342705	345654
Q9NS91	E3 ubiquitin-protein ligase RAD18	RAD18	194814	206307	202427	202860	200210	191786	138928	171618	165755
Q9NS87	Kinesin-like protein KIF15	KIF15	104459	103904	81286.8	88768	75700.4	91454.8	88505.8	85978.2	108791
Q9NS86	LanC-like protein 2	LANCL2	564041	562849	627386	607784	575756	538038	445043	544909	497612
Q9NS69	Mitochondrial import receptor subunit TOM22 homolog	TOMM22	3.72844e+06	4327479	5113669	3.54674e+06	4048664	4039701	3.57792e+06	3.98714e+06	3644695
Q9NS00	Glycoprotein-N-acetylgalactosamine 3-beta-galactosyltransferase 1	C1GALT1	137779	130881	143527	137652	131830	125852	109958	113390	100915
Q9NRZ9	Lymphoid-specific helicase	HELLS	584162	586156	591658	587152	532256	497906	491076	444758	496536
Q9NRZ7	1-acyl-sn-glycerol-3-phosphate acyltransferase gamma	AGPAT3	106950	113981	110024	150925	142285	139385	128208	134403	125093
Q9NRY6	Phospholipid scramblase 3	PLSCR3	64085	57172.3	59793.5	68446.3	85509.2	82787.1	97519.2	121041	113856
Q9NRY5	Protein FAM114A2	FAM114A2	172622	148927	111415	162284	182894	181839	215669	192754	216072
Q9NRY4	Rho GTPase-activating protein 35	ARHGAP35	162211	161258	177841	196795	212434	219314	197181	206416	197295
Q9NRY2	SOSS complex subunit C	INIP	37383.9	26819.6	20602	25220.9	23046.4	19060.4	28528.1	29118.8	29150.7
Q9NRX6	Protein kish-B	TMEM167B	206908	214671	209424	210861	235354	232087	166942	216159	226189
Q9NRX5	Serine incorporator 1	SERINC1	127156	117015	137685	176328	150040	176274	136283	139197	134996
Q9NRX4	14 kDa phosphohistidine phosphatase	PHPT1	194026	227223	224512	211643	189423	206763	217143	230891	245472
Q9NRX2	39S ribosomal protein L17, mitochondrial	MRPL17	1.02833e+06	1.04081e+06	1.03959e+06	1.05283e+06	1.04138e+06	965771	1.07602e+06	1.07569e+06	1079987
Q9NRX1	RNA-binding protein PNO1	PNO1	1.04232e+06	1.10469e+06	952985	1.06544e+06	990843	1.049e+06	873415	924901	875335
Q9NRW7	Vacuolar protein sorting-associated protein 45	VPS45	246320	236173	298008	255888	291913	287101	291782	271853	290316
Q9NRW3	DNA dC->dU-editing enzyme APOBEC-3C	APOBEC3C	401162	388537	278288	320474	238406	285766	437181	311762	352777
Q9NRV9	Heme-binding protein 1	HEBP1	934065	931667	1.04547e+06	1.02195e+06	987406	1.03413e+06	949952	1.02586e+06	963426
Q9NRR5	Ubiquilin-4	UBQLN4	274628	280742	295585	293250	304721	263259	291692	272808	264646
Q9NRP2	COX assembly mitochondrial protein 2 homolog	CMC2	444115	431745	439601	485247	498083	465359	440539	458742	408130
Q9NRP0	Oligosaccharyltransferase complex subunit OSTC	OSTC	2.35733e+06	2.20395e+06	1.93465e+06	2546691	2198164	2159468	2.49092e+06	2.5094e+06	2524872
Q9NRN9	rRNA N6-adenosine-methyltransferase METTL5	METTL5	329425	356750	404960	354741	377569	368116	313129	347960	334600
Q9NRN7	L-aminoadipate-semialdehyde dehydrogenase-phosphopantetheinyl transferase	AASDHPPT	319697	293647	256362	313656	238171	228007	334937	315543	318622
Q9NRM2	Zinc finger protein 277	ZNF277	68715.1	72634.1	89027.1	96287.6	81409.2	85060.1	53234.2	68048.8	60130.4
Q9NRL3	Striatin-4	STRN4	124076	125040	161291	171743	158228	143355	130992	136731	118818
Q9NRL2	Bromodomain adjacent to zinc finger domain protein 1A	BAZ1A	620306	541626	608090	642826	668793	675653	583833	568318	576609
Q9NRK6	ATP-binding cassette sub-family B member 10, mitochondrial	ABCB10	114235	122887	113290	145607	115169	116850	105029	92359.9	86122.2
Q9NRH2	SNF-related serine/threonine-protein kinase	SNRK	36361.6	51006.9	52464.6	44509.6	55514.4	28418.9	36341.4	53591.8	48194.7
Q9NRG9	Aladin	AAAS	759619	769303	993039	876750	880515	868442	792723	831045	845009
Q9NRG7	Epimerase family protein SDR39U1	SDR39U1	98058.1	88177.4	120684	117576	132967	126333	147182	122187	146878
Q9NRG4	N-lysine methyltransferase SMYD2	SMYD2	200775	166196	181507	173504	186758	177911	175135	168513	132638
Q9NRG1	Phosphoribosyltransferase domain-containing protein 1	PRTFDC1	297432	326451	265363	267230	249469	270501	286988	254609	291663
Q9NRG0	Chromatin accessibility complex protein 1	CHRAC1	789658	787499	852187	674196	772086	721941	709003	852292	858073
Q9NRF9	DNA polymerase epsilon subunit 3	POLE3	463426	486466	582601	466232	507962	522070	375853	442916	418729
Q9NRF8	CTP synthase 2	CTPS2	377026	314509	253155	325796	264328	286356	361139	283493	330624
Q9NRD5	PRKCA-binding protein	PICK1	51327.6	54428.8	37043.3	59768.7	49400.8	50862.5	56520.4	49234.3	44441.6
Q9NRA2	Sialin	SLC17A5	335621	334944	364816	403903	387006	399765	360669	406098	406150
Q9NR77	Peroxisomal membrane protein 2	PXMP2	149294	147471	186393	170511	207304	180285	208614	215099	207933
Q9NR56	Muscleblind-like protein 1	MBNL1	627900	627843	523964	553264	501541	518253	562742	530111	556818
Q9NR50	Translation initiation factor eIF-2B subunit gamma	EIF2B3	353181	353629	409675	366026	368798	361215	332792	351872	346262
Q9NR46	Endophilin-B2	SH3GLB2	334163	350350	407017	382427	441205	418420	434334	419627	397562
Q9NR45	Sialic acid synthase	NANS	2.6486e+06	2.5678e+06	2.28315e+06	3283860	3.00158e+06	2.84122e+06	2857191	2.86233e+06	2910881
Q9NR33	DNA polymerase epsilon subunit 4	POLE4	170842	164682	150830	133628	132967	137093	125604	132185	130129
Q9NR31	GTP-binding protein SAR1a	SAR1A	2.78022e+06	2.61069e+06	2851532	3198992	2.7673e+06	2.70376e+06	2.68796e+06	2.91569e+06	2.86189e+06
Q9NR30	Nucleolar RNA helicase 2	DDX21	7624072	7.57647e+06	8351222	7.67512e+06	7.15596e+06	7364176	5683594	6057797	5618155
Q9NR28	Diablo homolog, mitochondrial	DIABLO	687746	694606	730502	761595	769221	729047	837262	788107	793714
Q9NR19	Acetyl-coenzyme A synthetase, cytoplasmic	ACSS2	189826	186000	202466	235156	222728	217999	329257	259698	273221
Q9NR12	PDZ and LIM domain protein 7	PDLIM7	607764	602908	552838	644294	568452	558358	576299	551874	584212
Q9NR09	Baculoviral IAP repeat-containing protein 6	BIRC6	273669	302268	235296	317073	294726	296222	267232	261804	247273
Q9NQZ5	StAR-related lipid transfer protein 7, mitochondrial	STARD7	107655	85317.6	123224	138000	193833	191750	153686	164386	161773
Q9NQZ2	Something about silencing protein 10	UTP3	442726	409534	486646	397070	430775	418357	351782	365804	360485
Q9NQY0	Bridging integrator 3	BIN3	147120	152973	83869	128902	112339	122136	153778	142313	148912
Q9NQX7	Integral membrane protein 2C	ITM2C	93493.7	75352.5	150845	203435	166996	174545	137557	150909	132135
Q9NQX4	Unconventional myosin-Vc	MYO5C	120709	106318	116024	85794.8	113812	128088	115891	126095	116241
Q9NQX3	Gephyrin	GPHN	150433	155507	131548	160171	142619	143566	121684	112438	112127
Q9NQW7	Xaa-Pro aminopeptidase 1	XPNPEP1	2.17314e+06	2.23633e+06	2.39925e+06	2.19311e+06	2.44888e+06	2497281	2278989	2.40974e+06	2.17269e+06
Q9NQW6	Anillin	ANLN	672624	647079	842681	583681	748636	656478	827230	764436	864819
Q9NQU5	Serine/threonine-protein kinase PAK 6	PAK6	47403.3	41736.5	57436.9	55333.7	54861.4	55336.3	39395.5	44965.7	46696.3
Q9NQT5	Exosome complex component RRP40	EXOSC3	946734	936339	921115	1.12402e+06	1.04411e+06	1.00107e+06	834269	908195	884418
Q9NQT4	Exosome complex component RRP46	EXOSC5	363439	334359	298758	294579	292134	292798	311469	286640	314908
Q9NQS7	Inner centromere protein	INCENP	139953	144831	180919	159297	210856	206629	200676	180090	206829
Q9NQS1	Cell death regulator Aven	AVEN	172290	175086	154408	166186	159466	159201	147142	160020	154189
Q9NQR4	Omega-amidase NIT2	NIT2	1.22358e+06	1.25401e+06	1450311	1.48451e+06	1.52977e+06	1.38747e+06	1.48924e+06	1.55599e+06	1.44852e+06
Q9NQP4	Prefoldin subunit 4	PFDN4	879380	937772	741939	796826	860914	865742	875400	909330	927148
Q9NQH7	Xaa-Pro aminopeptidase 3	XPNPEP3	544615	512981	610588	539982	533914	550589	502964	528520	482141
Q9NQG5	Regulation of nuclear pre-mRNA domain-containing protein 1B	RPRD1B	780182	733020	670566	727080	664886	634879	819041	751483	776195
Q9NQG1	Protein MANBAL	MANBAL	50911.3	48474.4	57831.5	46755.2	55093.7	54080.9	52821.9	57309.6	60731.8
Q9NQE9	Histidine triad nucleotide-binding protein 3	HINT3	213737	217639	238278	285100	317214	305017	265102	278248	268175
Q9NQC3	Reticulon-4	RTN4	4978722	5142919	6180106	6019782	6079538	5.87145e+06	4.92779e+06	5514285	5.20313e+06
Q9NQB0	Transcription factor 7-like 2	TCF7L2	73330	33746	93213.2	26706.5	87120.8	56422.8	104186	102794	109197
Q9NQA3	WAS protein family homolog 6	WASH6P	43569.2	45323.8	57161.7	55111.3	54379.9	49518.7	52050.3	51603.9	53831.5
Q9NQ88	Fructose-2,6-bisphosphatase TIGAR	TIGAR	727710	739128	939784	842873	865719	830953	703784	748824	728079
Q9NQ55	Suppressor of SWI4 1 homolog	PPAN	703514	710949	751381	716977	739036	711216	492585	568456	544425
Q9NQ50	39S ribosomal protein L40, mitochondrial	MRPL40	351399	339442	353859	281740	326777	389040	338060	396568	348940
Q9NQ48	Leucine zipper transcription factor-like protein 1	LZTFL1	210726	213615	260533	222718	270914	264437	151136	274838	250672
Q9NQ34	Transmembrane protein 9B	TMEM9B	368477	357086	380718	406876	416469	395878	395041	427449	422164
Q9NQ29	Putative RNA-binding protein Luc7-like 1	LUC7L	883612	938044	990109	873128	890936	956886	920824	910876	886674
Q9NPR9	Protein GPR108	GPR108	41077.8	24227.2	40354.5	64689.2	98928.8	92235.2	37872.7	26747.1	74507.8
Q9NPQ8	Synembryn-A	RIC8A	703053	688110	869710	783064	838604	825769	686003	794159	736590
Q9NPL8	Complex I assembly factor TIMMDC1, mitochondrial	TIMMDC1	258431	252018	297513	263887	236732	251554	288008	277450	270197
Q9NPJ8	NTF2-related export protein 2	NXT2	271342	279036	302124	296666	276476	308902	252138	268064	284582
Q9NPJ6	Mediator of RNA polymerase II transcription subunit 4	MED4	101029	105984	101351	73543.9	115360	119656	106983	76127.2	100220
Q9NPJ3	Acyl-coenzyme A thioesterase 13	ACOT13	469660	416026	442222	548227	563776	513792	581636	590579	620184
Q9NPI6	mRNA-decapping enzyme 1A	DCP1A	246684	245847	298664	260697	274778	254748	184395	228030	188267
Q9NPI1	Bromodomain-containing protein 7	BRD7	58118.7	56102.6	61955	70018.6	54526	54686.2	56921.7	60737.1	60628.5
Q9NPF5	DNA methyltransferase 1-associated protein 1	DMAP1	72628.9	128640	101569	106161	106158	105004	65826.9	99906.5	46380.1
Q9NPF4	Probable tRNA N6-adenosine threonylcarbamoyltransferase	OSGEP	1.06917e+06	990619	963224	974699	1.30218e+06	1.12285e+06	848454	1.09568e+06	1.38538e+06
Q9NPF0	CD320 antigen	CD320	224395	259714	293017	227400	243115	236355	212470	221184	231250
Q9NPE3	H/ACA ribonucleoprotein complex subunit 3	NOP10	110021	122326	129460	120552	123391	115827	115666	98129.7	102054
Q9NPD8	Ubiquitin-conjugating enzyme E2 T	UBE2T	380171	402479	455022	527016	511737	523827	482826	481587	494063
Q9NPD3	Exosome complex component RRP41	EXOSC4	1.77807e+06	1.81421e+06	2.05723e+06	1.89329e+06	2098093	1.91729e+06	1732070	1.7897e+06	1.69738e+06
Q9NPB8	Glycerophosphocholine phosphodiesterase GPCPD1	GPCPD1	35241.7	23825.7	19021.1	16763.1	24164.1	25691.8	40396.2	32466	38185.3
Q9NPA8	Transcription and mRNA export factor ENY2	ENY2	184174	184632	160849	147393	154348	156373	206057	157171	172542
Q9NPA3	Mid1-interacting protein 1	MID1IP1	125343	145089	96457.7	111336	99881.6	94367.3	82144.3	154753	109647
Q9NPA0	ER membrane protein complex subunit 7	EMC7	496532	499907	580220	718867	690425	616476	565825	593236	532926
Q9NP97	Dynein light chain roadblock-type 1	DYNLRB1	1.24578e+06	1.19568e+06	1.34592e+06	1.482e+06	1.48657e+06	1.36469e+06	1.35163e+06	1.40277e+06	1308657
Q9NP92	39S ribosomal protein S30, mitochondrial	MRPS30	184987	187428	190766	156486	173447	214443	163502	194105	169308
Q9NP80	Calcium-independent phospholipase A2-gamma	PNPLA8	84847	74777.4	98636.2	78335.6	106514	116619	79597.8	95879.3	106848
Q9NP79	Vacuolar protein sorting-associated protein VTA1 homolog	VTA1	2.76614e+06	2.70859e+06	3511822	2929787	3.14736e+06	3.70585e+06	2744524	3.84573e+06	2.92696e+06
Q9NP77	RNA polymerase II subunit A C-terminal domain phosphatase SSU72	SSU72	449492	435690	513512	527470	522348	543664	432066	471525	449548
Q9NP72	Ras-related protein Rab-18	RAB18	2259718	2239739	2395749	2363678	2.41597e+06	2405284	2.21872e+06	2.18594e+06	2238452
Q9NP71	Carbohydrate-responsive element-binding protein	MLXIPL	12616.3	11455.3	15032.3	13846.3	14572.4	15868.3	21892.1	19974.3	21330.9
Q9NP66	High mobility group protein 20A	HMG20A	116833	143768	50224.5	157751	191078	152233	131566	176960	126790
Q9NP61	ADP-ribosylation factor GTPase-activating protein 3	ARFGAP3	93253.8	91461.5	79767.7	115314	114082	121569	120295	117390	126171
Q9NP50	SIN3-HDAC complex-associated factor	SINHCAF	42348.8	38258.7	49389.8	63949.1	62011	75477.6	58192.7	32573.7	50005.6
Q9NNX1	Tuftelin	TUFT1	17195.7	17751.6	16638.6	17999.6	18599	19798.4	21065.5	19887.4	20154.4
Q9NNW7	Thioredoxin reductase 2, mitochondrial	TXNRD2	1.008e+06	933979	838769	1186787	1.0298e+06	1.05799e+06	942147	1.01188e+06	1.00721e+06
Q9NNW5	WD repeat-containing protein 6	WDR6	161283	165078	217257	200115	223332	223563	175409	195415	173604
Q9HDC9	Adipocyte plasma membrane-associated protein	APMAP	3.7723e+06	3.60984e+06	4.15861e+06	4166980	4349277	4.18544e+06	3.81283e+06	4.07249e+06	3.90565e+06
Q9HDC5	Junctophilin-1	JPH1	38354.8	31723.5	30021.8	31296.8	29494	31619.6	36440.2	30933.8	28216.9
Q9HD67	Unconventional myosin-X	MYO10	73125	83964.6	90808.5	63699.1	83088.3	73576.4	79050.2	60388.7	80086.9
Q9HD47	Ran guanine nucleotide release factor	RANGRF	53566.3	50571	35664.3	57313.3	40169.6	40538.8	49728.1	52550.1	41672
Q9HD45	Transmembrane 9 superfamily member 3	TM9SF3	1.34541e+06	1.35894e+06	1.26585e+06	1434706	1281684	1.33852e+06	1.41125e+06	1.31279e+06	1.33757e+06
Q9HD42	Charged multivesicular body protein 1a	CHMP1A	466459	473802	534088	457817	510480	494646	437091	451119	441788
Q9HD34	LYR motif-containing protein 4	LYRM4	170999	180504	183671	146927	165618	172870	161215	176545	179664
Q9HD33	39S ribosomal protein L47, mitochondrial	MRPL47	805383	806545	814972	693888	745782	769790	793360	725724	709403
Q9HD26	Golgi-associated PDZ and coiled-coil motif-containing protein	GOPC	843297	793965	1.0569e+06	832713	749434	923984	710236	1.03866e+06	960883
Q9HD23	Magnesium transporter MRS2 homolog, mitochondrial	MRS2	57500.9	55303.3	86840.1	65249.9	75322.1	74465.3	70424.9	50402.8	58556.6
Q9HD20	Manganese-transporting ATPase 13A1	ATP13A1	692781	694705	693912	754470	759929	745098	676293	741989	722089
Q9HD15	Steroid receptor RNA activator 1	SRA1	269144	284384	291644	288770	284803	277588	220365	241244	235973
Q9HCY8	Protein S100-A14	S100A14	1.44308e+06	1596364	1.8924e+06	1674771	1.85897e+06	1.84764e+06	1.98286e+06	2149908	2.23115e+06
Q9HCU5	Prolactin regulatory element-binding protein	PREB	546492	528747	713286	588035	664231	627646	620296	681395	631197
Q9HCS7	Pre-mRNA-splicing factor SYF1	XAB2	282528	315691	328043	312746	300966	333987	258672	277001	267340
Q9HCN8	Stromal cell-derived factor 2-like protein 1	SDF2L1	920010	873927	1.00874e+06	1.00141e+06	1.14909e+06	1.19302e+06	860582	890594	894365
Q9HCN4	GPN-loop GTPase 1	GPN1	655081	627839	808420	647904	675593	635665	578428	642140	621736
Q9HCM4	Band 4.1-like protein 5	EPB41L5	39490.8	44086.5	30828.3	76354.4	70815.9	76297.9	41493.7	49438.6	46881
Q9HCL2	Glycerol-3-phosphate acyltransferase 1, mitochondrial	GPAM	48887.5	58118.5	34993	93843.5	60761.2	64065.3	68523.5	66985.8	67663.6
Q9HCK8	Chromodomain-helicase-DNA-binding protein 8	CHD8	129898	122424	156164	149631	156040	146015	103825	120152	109062
Q9HCH5	Synaptotagmin-like protein 2	SYTL2	369729	379348	407665	290292	291250	288357	516683	502625	522585
Q9HCG8	Pre-mRNA-splicing factor CWC22 homolog	CWC22	171416	172523	203677	186712	187473	176519	143942	173470	160765
Q9HCE5	N6-adenosine-methyltransferase non-catalytic subunit	METTL14	184414	188335	201322	191946	192902	198115	171583	175242	174107
Q9HCE1	Helicase MOV-10	MOV10	532894	511877	541531	594500	574255	532916	659851	641307	614938
Q9HCE0	Ectopic P granules protein 5 homolog	EPG5	94148.9	712005	622829	90254.5	101843	105771	136493	628207	131405
Q9HCD5	Nuclear receptor coactivator 5	NCOA5	506967	507614	630838	499566	564791	547758	479205	501381	473278
Q9HCC0	Methylcrotonoyl-CoA carboxylase beta chain, mitochondrial	MCCC2	789064	763288	849963	800334	830805	787373	697751	732576	689748
Q9HC62	Sentrin-specific protease 2	SENP2	6861.85	8936.45	5013.48	9589.44	7947.04	7647.13	4917.91	4263.82	6469.84
Q9HC52	Chromobox protein homolog 8	CBX8	176876	190506	203834	223457	213972	207360	195086	202073	199597
Q9HC38	Glyoxalase domain-containing protein 4	GLOD4	2294011	2.15186e+06	2620973	2.3009e+06	2.46927e+06	2458298	2.34237e+06	2469398	2.35408e+06
Q9HC36	rRNA methyltransferase 3, mitochondrial	MRM3	634133	631213	734052	653702	709024	706803	528163	539474	535039
Q9HC35	Echinoderm microtubule-associated protein-like 4	EML4	1.18573e+06	1.18473e+06	1.37904e+06	1.19005e+06	1.32245e+06	1.28783e+06	1.05948e+06	1.16254e+06	1.11697e+06
Q9HC21	Mitochondrial thiamine pyrophosphate carrier	SLC25A19	188487	188347	188151	194861	180962	175548	211242	208030	214422
Q9HC07	Transmembrane protein 165	TMEM165	649724	648736	681837	671986	645275	661783	680248	606384	632135
Q9HBU6	Ethanolamine kinase 1	ETNK1	63512.2	69900.2	53862.2	71212	82770.9	70478.5	67984.3	67990.9	50426.6
Q9HBR0	Putative sodium-coupled neutral amino acid transporter 10	SLC38A10	72170.5	88078.6	115979	146773	150251	148496	127175	128919	122488
Q9HBM1	Kinetochore protein Spc25	SPC25	67033.6	69916.2	70829.2	55546	62298.8	75687.9	74366.8	89595.9	71354.4
Q9HBL8	NmrA-like family domain-containing protein 1	NMRAL1	282434	280997	323711	283106	317165	304410	329315	324441	315233
Q9HBH5	Retinol dehydrogenase 14	RDH14	276340	288978	354267	334778	369486	349420	371201	380399	376656
Q9HBH1	Peptide deformylase, mitochondrial	PDF	426059	420177	454089	444417	444689	455109	419082	403830	398503
Q9HBH0	Rho-related GTP-binding protein RhoF	RHOF	321896	321901	349164	402282	393711	358990	303832	311286	304965
Q9HBE1	POZ-, AT hook-, and zinc finger-containing protein 1	PATZ1	75717.7	79409.1	68048.2	89498.7	75571.3	79107.1	73941.4	68356.8	74368.8
Q9HB90;Q9NQL2	Ras-related GTP-binding protein C;Ras-related GTP-binding protein D	RRAGC	233917	238177	213747	276385	281449	253542	291966	277587	292054
Q9HB71	Calcyclin-binding protein	CACYBP	3.57731e+06	3489114	3.10627e+06	3.01839e+06	2.82274e+06	2.68332e+06	3.58979e+06	2994094	3.2618e+06
Q9HB40	Retinoid-inducible serine carboxypeptidase	SCPEP1	86884.2	83948.8	83855.7	105274	107955	95859.9	166407	142529	151890
Q9HB21	Pleckstrin homology domain-containing family A member 1	PLEKHA1	3670.61	40588.3	44786.6	54291	35613.3	17366.5	33491.7	44517.1	44198.2
Q9HB09	Bcl-2-like protein 12	BCL2L12	45264.1	69359.5	56861.3	41168.9	52238.4	58147.2	43818.4	48060	59612.6
Q9HB07	MYG1 exonuclease	MYG1	1.79376e+06	1805253	1.86367e+06	1.53503e+06	1.63e+06	1.58843e+06	1.83944e+06	1.95173e+06	1.89251e+06
Q9HAV7	GrpE protein homolog 1, mitochondrial	GRPEL1	2.36284e+06	2.33306e+06	2.37005e+06	2140365	2228076	2.06515e+06	1.67801e+06	1.85039e+06	1.78403e+06
Q9HAV4	Exportin-5	XPO5	1065387	1.08909e+06	1.09326e+06	1.01677e+06	1.0286e+06	991645	1.03502e+06	1.01966e+06	953499
Q9HAU5	Regulator of nonsense transcripts 2	UPF2	190166	188020	186409	200977	208678	193108	162055	179766	157910
Q9HAU0	Pleckstrin homology domain-containing family A member 5	PLEKHA5	77667	67941.4	93746.7	84251.3	71102	72541.4	90459.2	93659.2	80481.2
Q9HAT2	Sialate O-acetylesterase	SIAE	88283.7	86037.1	67499.4	120603	126488	113188	168737	127536	144034
Q9HAS0	Protein Njmu-R1	C17orf75	151607	145348	139172	173745	159119	169418	141203	126707	126970
Q9HAN9	Nicotinamide/nicotinic acid mononucleotide adenylyltransferase 1	NMNAT1	318484	331504	377286	376946	384874	381899	343519	325791	348070
Q9HAD4	WD repeat-containing protein 41	WDR41	51042.2	32984	76425.3	41959.4	44462.5	45633.5	43193	38550	42959.6
Q9HAB8	Phosphopantothenate--cysteine ligase	PPCS	810100	796596	932906	888241	1.0036e+06	907660	847113	897140	867638
Q9HAB3	Solute carrier family 52, riboflavin transporter, member 2	SLC52A2	234283	224145	263403	234522	220732	230132	174976	223827	193327
Q9HA77	Probable cysteine--tRNA ligase, mitochondrial	CARS2	101437	96884.4	100495	124647	139236	131085	133164	120503	131928
Q9HA65	TBC1 domain family member 17	TBC1D17	106048	101014	82860.2	108105	101766	96806	123672	114306	122555
Q9HA64	Ketosamine-3-kinase	FN3KRP	73267.8	76189.2	61960.4	68442	61053.4	65175	78612.4	95495.6	85008.6
Q9H9Y6	DNA-directed RNA polymerase I subunit RPA2	POLR1B	343925	370819	406241	385108	385174	414526	251593	332404	295136
Q9H9Y2	Ribosome production factor 1	RPF1	158892	155412	183459	155634	166366	171689	120824	129616	126470
Q9H9T3	Elongator complex protein 3	ELP3	542602	516768	492736	451811	500933	449886	502442	494843	500440
Q9H9S4	Calcium-binding protein 39-like	CAB39L	72352.4	74708.3	74457.1	52569.9	73766.8	68784.5	94941.2	109678	104707
Q9H9S3	Protein transport protein Sec61 subunit alpha isoform 2	SEC61A2	1.49289e+06	1.41223e+06	1.56246e+06	1.45092e+06	1.53719e+06	1.59733e+06	1.36427e+06	1.47714e+06	1.44527e+06
Q9H9Q4	Non-homologous end-joining factor 1	NHEJ1	103390	116074	76229.3	93978.8	61550.1	67110	104978	91462.8	95722.3
Q9H9Q2	COP9 signalosome complex subunit 7b	COPS7B	232560	226931	243972	237187	250964	231355	259672	253464	230615
Q9H9P8	L-2-hydroxyglutarate dehydrogenase, mitochondrial	L2HGDH	66666.4	71045.5	47867.3	89734.9	68216.9	67030.9	104217	83061.7	100327
Q9H9L3	Interferon-stimulated 20 kDa exonuclease-like 2	ISG20L2	1.07947e+06	1.07628e+06	393384	614290	523002	655236	1.01862e+06	709489	854380
Q9H9J2	39S ribosomal protein L44, mitochondrial	MRPL44	379496	367424	356289	331637	319862	328143	377955	367122	346430
Q9H9H4	Vacuolar protein sorting-associated protein 37B	VPS37B	118809	110542	117862	116611	99072	106150	86650.9	86489.4	77224.9
Q9H9F9	Actin-related protein 5	ACTR5	113777	112084	154537	144976	118074	138594	92372.1	120880	121504
Q9H9E3	Conserved oligomeric Golgi complex subunit 4	COG4	139071	154792	151404	182337	187054	164022	158913	154100	148867
Q9H9C1	Spermatogenesis-defective protein 39 homolog	VIPAS39	32615.2	31276.9	30682.1	29105.7	39875	30656.2	52404.5	48590.6	42941.3
Q9H9B4	Sideroflexin-1	SFXN1	3712723	3.44439e+06	3.86591e+06	3.56668e+06	3.7754e+06	3.50515e+06	3.49703e+06	3.60618e+06	3.48405e+06
Q9H9B1	Histone-lysine N-methyltransferase EHMT1	EHMT1	53025.5	60580.5	59471.6	70554.8	64870.2	70024.2	47978.9	46145.2	48386.5
Q9H9A6	Leucine-rich repeat-containing protein 40	LRRC40	803728	777140	763408	714484	778603	869660	828923	821039	802590
Q9H9A5	CCR4-NOT transcription complex subunit 10	CNOT10	220683	218404	252111	133588	241234	238075	178713	211388	174811
Q9H993	Damage-control phosphatase ARMT1	ARMT1	303108	285818	298588	219172	284347	227592	304701	332221	307383
Q9H977	WD repeat-containing protein 54	WDR54	82164.3	72644.1	84121.8	107839	104957	94243	104429	105115	101488
Q9H974	Queuine tRNA-ribosyltransferase accessory subunit 2	QTRT2	110231	116884	161000	163007	147627	161797	111926	134778	107252
Q9H967	WD repeat-containing protein 76	WDR76	101171	124486	110172	151285	166451	163834	128665	155041	129715
Q9H944	Mediator of RNA polymerase II transcription subunit 20	MED20	179693	201424	222521	199163	193235	163370	163688	189852	190395
Q9H936	Mitochondrial glutamate carrier 1	SLC25A22	2.30871e+06	2.23346e+06	2.59369e+06	2.53065e+06	2625044	2.53843e+06	2.35827e+06	2.50051e+06	2473606
Q9H910	Jupiter microtubule associated homolog 2	JPT2	2834610	2.93442e+06	3682975	3.10444e+06	3.44729e+06	3.16934e+06	2648197	2704711	2.53896e+06
Q9H900	Protein zwilch homolog	ZWILCH	93369.9	101127	72448.8	113598	77751.4	93329	101261	104717	108860
Q9H8Y8	Golgi reassembly-stacking protein 2	GORASP2	903755	916184	1.01636e+06	1.11039e+06	1.09076e+06	1.06807e+06	839572	900921	878180
Q9H8Y5	Ankyrin repeat and zinc finger domain-containing protein 1	ANKZF1	936802	180243	358886	479973	650971	631022	791068	286360	525687
Q9H8V3	Protein ECT2	ECT2	212128	206536	275478	339366	346097	341448	279340	270255	265951
Q9H8T0	AKT-interacting protein	AKTIP	187399	171573	180985	202948	218435	182184	152005	182615	185578
Q9H8P0	Polyprenol reductase	SRD5A3	49200.4	36147	36236.3	80576.3	81903.6	76000.5	38713.8	44992.1	42501.3
Q9H8M7	Ubiquitin carboxyl-terminal hydrolase MINDY-3	MINDY3	263996	272624	311283	327679	334919	325772	320481	295375	335780
Q9H8H3	Methyltransferase-like protein 7A	METTL7A	25535.8	33618.7	45333.7	18144.1	13934.3	26628	75040.4	106484	106191
Q9H8H2	Probable ATP-dependent RNA helicase DDX31	DDX31	248093	254430	254349	261980	246379	236713	178521	216708	214137
Q9H8H0	Nucleolar protein 11	NOL11	1.00719e+06	1.00164e+06	1.11467e+06	915392	955273	948445	875501	972022	911602
Q9H8G2	Caspase activity and apoptosis inhibitor 1	CAAP1	181468	177947	215525	171886	186218	183998	169823	181866	180381
Q9H892	Tetratricopeptide repeat protein 12	TTC12	32002.9	35196.3	17274.4	30110.3	24115.5	29113.6	33301.8	31083.4	38590.8
Q9H875	PRKR-interacting protein 1	PRKRIP1	22117.5	28821.6	32607.7	33411.9	22359.3	35511.8	27882.3	37327.4	24276.4
Q9H871	E3 ubiquitin-protein transferase RMND5A	RMND5A	85569.6	78105.4	80965.5	86269.7	89933.2	89528.5	69518.7	59064.9	69038.4
Q9H867	Protein-lysine methyltransferase METTL21D	VCPKMT	30779.6	30262.4	19383.2	36115.3	37152.2	38723.6	31489.8	17766.6	26192
Q9H857	5'-nucleotidase domain-containing protein 2	NT5DC2	132190	123202	151110	120903	116160	117412	144336	148254	157563
Q9H845	Complex I assembly factor ACAD9, mitochondrial	ACAD9	948703	991364	1.04958e+06	989889	1.03089e+06	1072818	951423	980269	908266
Q9H840	Gem-associated protein 7	GEMIN7	405974	388417	557332	402545	297148	527389	402314	461040	412515
Q9H832	Ubiquitin-conjugating enzyme E2 Z	UBE2Z	688470	696393	760018	648672	775613	716743	433526	735898	720083
Q9H814	Phosphorylated adapter RNA export protein	PHAX	493741	498748	523605	576773	618378	592537	440001	461259	427716
Q9H7Z7	Prostaglandin E synthase 2	PTGES2	357895	326908	339792	324347	389864	366608	321211	336863	349980
Q9H7Z6	Histone acetyltransferase KAT8	KAT8	125638	132034	147155	88771.3	148667	145004	100927	123312	93588.1
Q9H7Z3	Nuclear exosome regulator NRDE2	NRDE2	26747.3	32525.9	20872.5	36981.2	33315.5	34952.1	36935.7	20914.3	30505
Q9H7S9	Zinc finger protein 703	ZNF703	57848.7	55970.8	73110	164522	130452	127506	137256	118504	111725
Q9H7N4	Splicing factor, arginine/serine-rich 19	SCAF1	224976	204059	248779	190781	210526	225090	241225	250211	235413
Q9H7L9	Sin3 histone deacetylase corepressor complex component SDS3	SUDS3	183124	193967	201016	221447	214367	208487	239721	238640	239954
Q9H7E9	UPF0488 protein C8orf33	C8orf33	326021	327304	402594	311801	346225	349444	292741	322107	312529
Q9H7E2	Tudor domain-containing protein 3	TDRD3	25622.5	23830.5	41509.6	33389	40164.3	27205.1	18851.4	11114	15729.3
Q9H7D7	WD repeat-containing protein 26	WDR26	270168	271460	270968	299299	287647	273524	266026	292845	266288
Q9H7D0	Dedicator of cytokinesis protein 5	DOCK5	137126	144382	111653	160590	145012	142388	176000	173749	167020
Q9H7B4	Histone-lysine N-methyltransferase SMYD3	SMYD3	48445.6	58264.2	54851.5	86243.7	48853.7	116435	88619.8	61236.2	83458
Q9H7B2	Ribosome production factor 2 homolog	RPF2	634022	786265	781875	710721	750023	790593	669539	682020	645070
Q9H788	SH2 domain-containing protein 4A	SH2D4A	185414	183959	216393	161591	109752	196011	171864	136132	197910
Q9H773	dCTP pyrophosphatase 1	DCTPP1	1.87328e+06	1.85846e+06	1.97696e+06	1.81026e+06	1.67523e+06	1.75438e+06	1.5493e+06	1.71596e+06	1.62229e+06
Q9H6Z4	Ran-binding protein 3	RANBP3	577302	583672	685795	659238	664334	592099	604441	594787	565744
Q9H6Y2	WD repeat-containing protein 55	WDR55	386570	394965	447702	355704	404627	427484	368235	378490	376467
Q9H6W3	Ribosomal oxygenase 1	RIOX1	314903	312982	355787	313456	327908	283343	306844	288237	290168
Q9H6V9	Lipid droplet-associated hydrolase	LDAH	167374	159693	107389	163637	122900	128639	219090	149917	173137
Q9H6U8	Alpha-1,2-mannosyltransferase ALG9	ALG9	156109	150027	182268	202745	218119	225423	187443	187901	176684
Q9H6T3	RNA polymerase II-associated protein 3	RPAP3	1.18818e+06	1.21367e+06	1.35784e+06	1.18367e+06	1202533	1.23234e+06	1.0906e+06	1057461	1.03186e+06
Q9H6T0	Epithelial splicing regulatory protein 2	ESRP2	457348	446525	529956	485349	513865	460775	411204	382997	384527
Q9H6S3	Epidermal growth factor receptor kinase substrate 8-like protein 2	EPS8L2	4439347	4.402e+06	5.44447e+06	4885881	5254985	5.00105e+06	5219207	5.29543e+06	5178922
Q9H6S0	3'-5' RNA helicase YTHDC2	YTHDC2	714420	693238	794432	647196	672936	637632	615944	655540	612781
Q9H6R4	Nucleolar protein 6	NOL6	312646	303090	341220	387642	440565	424927	578620	696223	698027
Q9H6R0	ATP-dependent RNA helicase DHX33	DHX33	266781	281848	293885	286997	300272	267526	237173	238342	233759
Q9H6Q4	Cytosolic iron-sulfur assembly component 3	CIAO3	80405.6	86924	97588.1	96213.2	100167	92157.7	97493.1	99563.1	105396
Q9H6H4	Receptor expression-enhancing protein 4	REEP4	211584	217577	234527	207578	204118	210197	188507	202647	201340
Q9H6F5	Coiled-coil domain-containing protein 86	CCDC86	551113	549683	619096	511904	507550	495955	400206	409221	417660
Q9H6E5	Speckle targeted PIP5K1A-regulated poly(A) polymerase	TUT1	22485.4	24353	29702.7	36171	39157	37825	26505.6	23189.3	30550
Q9H6E4	Coiled-coil domain-containing protein 134	CCDC134	601972	597641	802577	621240	666447	636195	658261	652386	627307
Q9H6D7	HAUS augmin-like complex subunit 4	HAUS4	128012	120126	138971	127480	127702	116271	132787	122700	132651
Q9H5Z1	Probable ATP-dependent RNA helicase DHX35	DHX35	66389.9	65547.3	76489.5	67813.4	81594.5	78516	66474.6	71837.7	64692.6
Q9H5X1	Cytosolic iron-sulfur assembly component 2A	CIAO2A	258092	278034	210754	289175	246176	250107	329033	274943	284254
Q9H5V9	UPF0428 protein CXorf56	STEEP1	92177.5	75105.8	97738.6	103973	93914.4	96780.8	80824.3	89361.2	84095.9
Q9H5V8	CUB domain-containing protein 1	CDCP1	496341	533489	501934	706089	627038	555720	528920	533341	531276
Q9H5Q4	Dimethyladenosine transferase 2, mitochondrial	TFB2M	273677	275685	310842	253673	271001	279925	181234	195519	159608
Q9H5N1	Rab GTPase-binding effector protein 2	RABEP2	164514	179590	220899	175778	187304	187504	206109	213904	199380
Q9H5K3	Protein O-mannose kinase	POMK	122892	134859	163412	167823	166979	147169	147445	160544	138002
Q9H5I1	Histone-lysine N-methyltransferase SUV39H2	SUV39H2	22918.8	20453	21347.4	23024.1	14403.7	19853.2	19632.6	14092.5	16881
Q9H5H4	Zinc finger protein 768	ZNF768	61349.9	44006.5	66064.4	83623.4	80418.3	79396.7	57779.4	66143.7	61881.1
Q9H583	HEAT repeat-containing protein 1	HEATR1	1406880	1.43607e+06	1.75774e+06	1442265	1583564	1.47079e+06	1.17111e+06	1.2383e+06	1.18203e+06
Q9H553	Alpha-1,3/1,6-mannosyltransferase ALG2	ALG2	137936	154058	138129	173287	159362	120933	102236	134377	141839
Q9H501	ESF1 homolog	ESF1	288420	273522	270421	317268	279776	264895	224147	229507	211506
Q9H4M9	EH domain-containing protein 1	EHD1	917917	901547	1.05239e+06	901511	991780	919586	834889	894758	857303
Q9H4L7	SWI/SNF-related matrix-associated actin-dependent regulator of chromatin subfamily A containing DEAD/H box 1	SMARCAD1	143256	149674	131265	128173	121108	118510	122314	130128	133363
Q9H4L5	Oxysterol-binding protein-related protein 3	OSBPL3	133792	148838	179419	146066	150903	153533	136202	157640	146913
Q9H4L4	Sentrin-specific protease 3	SENP3	930758	332180	383879	344935	1097705	371041	1.02168e+06	300307	1.03312e+06
Q9H4I3	TraB domain-containing protein	TRABD	199865	186566	226239	206826	233893	234467	208228	191581	195390
Q9H4H8	Protein FAM83D	FAM83D	102026	110979	59031.2	147393	104042	102079	175571	144152	178084
Q9H4G0	Band 4.1-like protein 1	EPB41L1	476305	510983	502697	690924	592108	574320	378274	381335	423361
Q9H4B0	Probable tRNA N6-adenosine threonylcarbamoyltransferase, mitochondrial	OSGEPL1	190350	193126	211801	207500	203371	157818	239972	251006	251477
Q9H4A6	Golgi phosphoprotein 3	GOLPH3	502199	524092	566682	655409	597505	611749	464239	501149	460897
Q9H4A5	Golgi phosphoprotein 3-like	GOLPH3L	228768	258175	307933	249077	309907	288991	227844	267194	246565
Q9H4A4	Aminopeptidase B	RNPEP	3101602	3113089	3.40542e+06	3.44576e+06	3.64847e+06	3.62038e+06	3.07054e+06	3178224	3050577
Q9H4A3	Serine/threonine-protein kinase WNK1	WNK1	325315	312589	418509	318792	364680	363953	306054	350797	314181
Q9H497	Torsin-3A	TOR3A	55515.2	61177.7	67197.7	49900.5	58345	30309.8	59843.4	42406.3	52656.5
Q9H490	Phosphatidylinositol glycan anchor biosynthesis class U protein	PIGU	368962	379349	393498	393158	415457	379527	399428	403566	378576
Q9H488	GDP-fucose protein O-fucosyltransferase 1	POFUT1	208270	229714	227723	270744	261791	233212	237296	258510	226673
Q9H479	Fructosamine-3-kinase	FN3K	38442.2	46925.4	48032.2	79492.5	69813.4	71530	63689.1	62900.6	62945.2
Q9H469	F-box/LRR-repeat protein 15	FBXL15	75695.5	73216.7	83726.4	75435.8	84602.6	83218.3	73669.2	76232.8	65966.8
Q9H467	CUE domain-containing protein 2	CUEDC2	21853.5	20613.4	36769.5	39170.3	42505.1	45538.8	46240.7	47016.3	46503.8
Q9H446	RWD domain-containing protein 1	RWDD1	169958	165007	92454	161592	123490	113124	182392	125029	149566
Q9H444	Charged multivesicular body protein 4b	CHMP4B	1.24754e+06	1.26485e+06	1.48271e+06	1.24547e+06	1.37392e+06	1.30779e+06	1.23096e+06	1.18581e+06	1.19853e+06
Q9H425	Uncharacterized protein C1orf198	C1orf198	86983.3	115308	157259	201531	171058	173754	97281.4	179073	132701
Q9H410	Kinetochore-associated protein DSN1 homolog	DSN1	78333	66869.3	72341.2	94529.4	90776.1	91811.6	80105.1	88597	82988.4
Q9H3Z4	DnaJ homolog subfamily C member 5	DNAJC5	79340.4	77118.8	96211.3	97117.9	108277	94341.4	89503.9	99659.6	92440.5
Q9H3U1	Protein unc-45 homolog A	UNC45A	645487	676352	810719	783849	764405	706107	673588	727214	678327
Q9H3S7	Tyrosine-protein phosphatase non-receptor type 23	PTPN23	485258	469970	567284	611281	598969	605552	519384	547221	506088
Q9H3R5	Centromere protein H	CENPH	122266	124178	151534	150110	171730	161734	149155	158886	151422
Q9H3R2	Mucin-13	MUC13	732800	750044	777090	1.05358e+06	1.08112e+06	1.08429e+06	1.05631e+06	1.1108e+06	1.0645e+06
Q9H3Q3	Galactose-3-O-sulfotransferase 2	GAL3ST2	73364.3	75369.4	66209.1	90370.5	89563.7	83196.5	60820.5	72456	72540.5
Q9H3Q1	Cdc42 effector protein 4	CDC42EP4	91598.2	92286.3	92255.4	116329	99884.1	102096	104354	122801	120716
Q9H3P7	Golgi resident protein GCP60	ACBD3	914098	885194	912481	911245	988324	929508	886074	924976	887140
Q9H3P2	Negative elongation factor A	NELFA	606862	618128	652640	589883	615994	623033	562889	594236	619097
Q9H3N1	Thioredoxin-related transmembrane protein 1	TMX1	2.80738e+06	2.77425e+06	3.06927e+06	2.79215e+06	3.18154e+06	3.20452e+06	2.77186e+06	2.63677e+06	2.72471e+06
Q9H3M7	Thioredoxin-interacting protein	TXNIP	378597	374268	191694	231300	203595	201226	345985	284031	300638
Q9H3L0	Cobalamin trafficking protein CblD	MMADHC	44269.3	48146.9	55688.2	88759.3	78012	73680	77769.7	65092.5	70032.6
Q9H3K6	BolA-like protein 2	BOLA2	1.44281e+06	1.40621e+06	1.69308e+06	1.42193e+06	1.62495e+06	1.55888e+06	1.44236e+06	1.50512e+06	1.45637e+06
Q9H3K2	Growth hormone-inducible transmembrane protein	GHITM	802526	801527	916744	957354	1.00392e+06	993820	1.03579e+06	1.03396e+06	1.02272e+06
Q9H3H5	UDP-N-acetylglucosamine--dolichyl-phosphate N-acetylglucosaminephosphotransferase	DPAGT1	85680.3	82283.1	97191.9	110743	98868.2	126965	109222	89647	117123
Q9H3H3	UPF0696 protein C11orf68	C11orf68	259578	220698	291608	322793	325257	309579	254466	276949	259682
Q9H3H1	tRNA dimethylallyltransferase	TRIT1	127881	113294	67538.1	92198.8	70185.8	90820.6	125215	108153	138109
Q9H3G5	Probable serine carboxypeptidase CPVL	CPVL	559707	629397	613336	670989	705289	635522	914084	977302	925256
Q9H3F6	BTB/POZ domain-containing adapter for CUL3-mediated RhoA degradation protein 3	KCTD10	59557.3	71395.7	43550.9	92490.2	89427.1	79328.9	52539.1	70691.3	65739
Q9H3C7	Gametogenetin-binding protein 2	GGNBP2	42429.5	44017.7	53396.7	65464.4	66216.6	69946.1	25121.5	31535.1	16294.9
Q9H330	Transmembrane protein 245	TMEM245	300659	297538	289267	319827	310836	328631	323155	324679	322978
Q9H329	Band 4.1-like protein 4B	EPB41L4B	11934.7	19545.5	22253.6	37684	36357.8	40148.7	13825.2	25200	13618.9
Q9H307	Pinin	PNN	653456	634384	805255	619647	708238	696499	646687	682026	669896
Q9H2W6	39S ribosomal protein L46, mitochondrial	MRPL46	433818	412172	404458	423222	398903	371225	395240	367193	380113
Q9H2V7	Protein spinster homolog 1	SPNS1	185848	216580	197353	288367	231910	261206	201765	221360	191800
Q9H2U2	Inorganic pyrophosphatase 2, mitochondrial	PPA2	1071312	1.13516e+06	1.26387e+06	1.18617e+06	1.24679e+06	1241154	1.09263e+06	1.12877e+06	1.04299e+06
Q9H2U1	ATP-dependent DNA/RNA helicase DHX36	DHX36	836363	800074	865074	479360	728265	773261	938488	898157	902285
Q9H2P9	Diphthine methyl ester synthase	DPH5	208752	196907	235031	222407	224666	220965	194638	208761	200741
Q9H2P0	Activity-dependent neuroprotector homeobox protein	ADNP	585996	520364	558452	516509	478275	486413	486934	670807	589516
Q9H2M9	Rab3 GTPase-activating protein non-catalytic subunit	RAB3GAP2	487358	486687	538999	522314	544562	537102	513808	550711	499334
Q9H2K8	Serine/threonine-protein kinase TAO3	TAOK3	38002	35333.3	32063.8	30942.3	35134.2	39394.8	35156.1	36324.8	31624.4
Q9H2J4	Phosducin-like protein 3	PDCL3	236417	246450	283880	231468	263964	239265	202538	190377	185184
Q9H2H9	Sodium-coupled neutral amino acid transporter 1	SLC38A1	224241	236421	276973	270458	270061	271146	221107	236009	235195
Q9H2H8	Peptidyl-prolyl cis-trans isomerase-like 3	PPIL3	436124	426991	528255	442868	487217	450680	456068	529447	477782
Q9H2G2	STE20-like serine/threonine-protein kinase	SLK	503023	449586	658566	616055	674790	662333	637139	632142	608653
Q9H2F5	Enhancer of polycomb homolog 1	EPC1	13689.9	16312	11789.8	11376.3	11915.7	12835	13548.7	13706.9	13498.6
Q9H2D6	TRIO and F-actin-binding protein	TRIOBP	173784	173365	200925	174033	210018	206872	190425	184134	178127
Q9H2D1	Mitochondrial folate transporter/carrier	SLC25A32	80587.4	80504.6	139220	124067	87607	86821.2	87712.4	91433.9	82948.8
Q9H2C0	Gigaxonin	GAN	254103	247358	244543	234607	246014	251056	242140	265520	272078
Q9H299	SH3 domain-binding glutamic acid-rich-like protein 3	SH3BGRL3	1634919	1.61477e+06	1.56468e+06	1.67604e+06	1.3139e+06	1.48785e+06	1.42731e+06	1.37412e+06	1.38963e+06
Q9H270	Vacuolar protein sorting-associated protein 11 homolog	VPS11	106877	97840.2	120664	109086	126097	108390	137188	124811	108789
Q9H269	Vacuolar protein sorting-associated protein 16 homolog	VPS16	224090	259414	303451	320186	306833	315364	292543	301145	284850
Q9H267	Vacuolar protein sorting-associated protein 33B	VPS33B	399576	238219	257199	299396	346078	335644	312804	319863	367531
Q9H223	EH domain-containing protein 4	EHD4	1.59979e+06	1.63242e+06	2.00314e+06	1.7754e+06	1.86937e+06	1.84872e+06	1.40943e+06	1.54405e+06	1.44895e+06
Q9H204	Mediator of RNA polymerase II transcription subunit 28	MED28	48599.1	43730.4	48189.3	51430.3	50002.8	44781.4	38457.9	47350.3	43801.5
Q9H1Z4	WD repeat-containing protein 13	WDR13	126405	124665	115715	154503	141901	129500	137960	145953	140603
Q9H1Y0	Autophagy protein 5	ATG5	236086	221514	221168	242182	219544	207346	243885	259003	255300
Q9H1P3	Oxysterol-binding protein-related protein 2	OSBPL2	53322.6	56127	70747.5	76655.1	80666.3	90019.4	78711.3	90865.3	87115.5
Q9H1K1	Iron-sulfur cluster assembly enzyme ISCU, mitochondrial	ISCU	352364	337952	411805	342280	313595	351155	327901	360211	333230
Q9H1K0	Rabenosyn-5	RBSN	42078.2	38911.4	44452.8	52218.5	45828.4	45222.6	53403	55704.2	55330.1
Q9H1I8	Activating signal cointegrator 1 complex subunit 2	ASCC2	170564	164448	178453	148751	168905	162825	145541	152416	151752
Q9H1E5	Thioredoxin-related transmembrane protein 4	TMX4	412303	412608	483896	420184	489823	455165	491196	515161	483840
Q9H1E3	Nuclear ubiquitous casein and cyclin-dependent kinase substrate 1	NUCKS1	582546	508557	490405	457205	566999	587519	499172	523332	571281
Q9H1D9	DNA-directed RNA polymerase III subunit RPC6	POLR3F	357058	404548	328640	426377	485820	455635	399898	375853	463626
Q9H1C4	Protein unc-93 homolog B1	UNC93B1	95059.9	117822	143416	129527	118352	88166.5	122591	122818	125941
Q9H1B7	Probable E3 ubiquitin-protein ligase IRF2BPL	IRF2BPL	237299	216363	226888	259422	255311	246998	238039	249814	262841
Q9H1A4	Anaphase-promoting complex subunit 1	ANAPC1	293728	262284	287165	269790	272267	261962	258179	241818	250107
Q9H190	Syntenin-2	SDCBP2	81496.5	82920.5	87769.8	90738.6	97303	95993.4	68115.5	79803.8	85543.8
Q9H173	Nucleotide exchange factor SIL1	SIL1	156418	145904	119860	164071	151375	153558	182972	164838	179955
Q9H147	Deoxynucleotidyltransferase terminal-interacting protein 1	DNTTIP1	65163.6	82322.8	58709.9	66320.5	61756.2	80887	67944.2	90168.8	87730.8
Q9H116	GDNF-inducible zinc finger protein 1	GZF1	24673.4	28049	34598.2	29603.3	30873.4	28874.1	27652	29528.8	30311.6
Q9H0X9	Oxysterol-binding protein-related protein 5	OSBPL5	38519.1	37481.8	29188.3	66880.4	53474.4	46322.6	58926.7	58491.6	54890.8
Q9H0X4	Protein FAM234A	FAM234A	52442	44281.3	57389.1	88383	82393.4	79640.5	80396	78793.9	74827.3
Q9H0W9	Ester hydrolase C11orf54	C11orf54	707607	727411	674442	828055	738244	741266	903719	936869	955553
Q9H0W8	Protein SMG9	SMG9	77228.3	81493.4	70191.6	77565.9	73898.1	71571.2	64900.7	63351.6	66354.3
Q9H0V9	VIP36-like protein	LMAN2L	238439	188613	289388	148524	300253	266265	294463	303726	312525
Q9H0U9	Testis-specific Y-encoded-like protein 1	TSPYL1	134511	122039	176940	237961	248680	217902	196398	206087	206072
Q9H0U6	39S ribosomal protein L18, mitochondrial	MRPL18	700375	653425	647168	687405	700839	667801	665411	649120	640620
Q9H0U4	Ras-related protein Rab-1B	RAB1B	7290385	7.05076e+06	7217957	7.55744e+06	7483172	7.60766e+06	6972368	7.37508e+06	7.40229e+06
Q9H0U3	Magnesium transporter protein 1	MAGT1	1.06125e+06	1032382	1.16475e+06	989304	1.11512e+06	1.08358e+06	1.14722e+06	1.14702e+06	1.15174e+06
Q9H0T7	Ras-related protein Rab-17	RAB17	12401756	12081351	14447844	12024793	13399963	12401954	10142664	11360461	10814079
Q9H0S4	Probable ATP-dependent RNA helicase DDX47	DDX47	1.21517e+06	1216921	1.37039e+06	1.31905e+06	1.195e+06	1.24058e+06	1.01927e+06	1.11692e+06	1.10233e+06
Q9H0R8	Gamma-aminobutyric acid receptor-associated protein-like 1	GABARAPL1	260380	214867	299136	309337	296115	318786	276108	286980	284845
Q9H0R6	Glutamyl-tRNA(Gln) amidotransferase subunit A, mitochondrial	QRSL1	152860	142475	188879	138085	168370	158606	152936	164703	167845
Q9H0R4	Haloacid dehalogenase-like hydrolase domain-containing protein 2	HDHD2	104930	119005	92565.8	110212	90108.1	108367	136806	83355.9	89432.4
Q9H0R3	Transmembrane protein 222	TMEM222	52966.7	51397.2	63803.7	48290.1	54882.8	43888.3	49761.8	51297.1	46130.8
Q9H0P0	Cytosolic 5'-nucleotidase 3A	NT5C3A	394814	412167	468928	383657	417374	401999	387223	443754	438797
Q9H0N5	Pterin-4-alpha-carbinolamine dehydratase 2	PCBD2	407017	351229	416710	354587	378906	402056	272537	425334	443902
Q9H0N0	Ras-related protein Rab-6C	RAB6C	320598	244031	232472	296808	357661	288149	325992	290195	311291
Q9H0L4	Cleavage stimulation factor subunit 2 tau variant	CSTF2T	2.10918e+06	2.06598e+06	2.28277e+06	2.23719e+06	2.16762e+06	2.18408e+06	1.99582e+06	2.17521e+06	2.01331e+06
Q9H0K6	Pseudouridylate synthase 7 homolog-like protein	PUS7L	144929	136289	174034	165544	157273	152601	113124	141079	123600
Q9H0H5	Rac GTPase-activating protein 1	RACGAP1	135951	160609	171371	228905	226114	222842	230767	204006	227885
Q9H0H0	Integrator complex subunit 2	INTS2	50664.9	54505.8	44007.6	41850.7	58137	54836.7	55442	47651.3	49184.7
Q9H0G5	Nuclear speckle splicing regulatory protein 1	NSRP1	146929	144834	152238	128269	141199	140631	118142	120966	115971
Q9H0E9	Bromodomain-containing protein 8	BRD8	110147	111927	98865.6	102731	94748.3	102174	92468.7	107389	103947
Q9H0E3	Histone deacetylase complex subunit SAP130	SAP130	89374.7	98473.3	94068.6	107653	127102	134510	67818.9	91541.8	82149.7
Q9H0E2	Toll-interacting protein	TOLLIP	702251	761471	639500	776396	748406	752346	881576	910598	850704
Q9H0D6	5'-3' exoribonuclease 2	XRN2	2788094	2.87974e+06	2.74637e+06	2767651	2.62821e+06	2.50687e+06	2.53565e+06	2.55882e+06	2.47074e+06
Q9H0C8	Integrin-linked kinase-associated serine/threonine phosphatase 2C	ILKAP	720297	662790	766259	683724	698745	690886	603939	667869	630220
Q9H0B6	Kinesin light chain 2	KLC2	1.08149e+06	902746	986106	899943	842405	965448	978672	972662	1.05433e+06
Q9H0A8	COMM domain-containing protein 4	COMMD4	324235	288318	366744	349498	325554	309315	259908	296736	273671
Q9H0A0	RNA cytidine acetyltransferase	NAT10	992091	1.01609e+06	1.1906e+06	1.03698e+06	1.04257e+06	1.018e+06	799761	905790	835995
Q9H098	Protein FAM107B	FAM107B	72645.6	68945.5	67459.3	95453.9	85368.9	77848.7	54767.9	64542	55861.3
Q9H089	Large subunit GTPase 1 homolog	LSG1	836397	823358	901602	839853	808502	795915	739223	746872	719851
Q9H082	Ras-related protein Rab-33B	RAB33B	175063	187118	207554	192473	229045	218960	196979	207402	202918
Q9H081	Protein MIS12 homolog	MIS12	152533	138575	174998	154871	177745	173671	138341	151637	162599
Q9H078	Caseinolytic peptidase B protein homolog	CLPB	328403	355928	386028	378603	370506	378629	263526	302474	288801
Q9H074	Polyadenylate-binding protein-interacting protein 1	PAIP1	1.42594e+06	1.36214e+06	1.55991e+06	1.38904e+06	1.54523e+06	1.49899e+06	1.43768e+06	1.53809e+06	1.48214e+06
Q9H061	Transmembrane protein 126A	TMEM126A	359494	356764	415942	338045	409292	425134	362881	409512	406190
Q9H019	Mitochondrial fission regulator 1-like	MTFR1L	10474.5	10156.4	9796.3	7286.9	14451	11458.7	16094.9	12675	11582.5
Q9H000	Probable E3 ubiquitin-protein ligase makorin-2	MKRN2	168548	105270	136506	88375.3	60033.3	59359.9	130522	132273	133362
Q9GZZ9	Ubiquitin-like modifier-activating enzyme 5	UBA5	727649	776546	795063	746865	779378	753413	692466	759558	665418
Q9GZZ1	N-alpha-acetyltransferase 50	NAA50	1.70116e+06	1.71895e+06	1.93066e+06	1.75449e+06	1.76495e+06	1.73488e+06	1.52865e+06	1.62596e+06	1.51997e+06
Q9GZY8	Mitochondrial fission factor	MFF	63035.8	73266.9	62810.6	94089.5	86109.2	79092.8	74083.4	79191	84165.5
Q9GZX9	Twisted gastrulation protein homolog 1	TWSG1	99847.9	107627	104751	127849	116339	118577	125968	146442	77448.2
Q9GZV4	Eukaryotic translation initiation factor 5A-2	EIF5A2	262119	264314	327368	252891	280298	261480	336530	314917	328212
Q9GZU8	PSME3-interacting protein	PSME3IP1	208555	210884	254418	206148	229069	204506	184571	185779	191837
Q9GZT9	Egl nine homolog 1	EGLN1	125809	139607	138744	129333	139808	139714	120012	127002	122697
Q9GZT8	NIF3-like protein 1	NIF3L1	296923	266012	272574	384661	355125	317407	326657	341679	316413
Q9GZT4	Serine racemase	SRR	29358.5	29691	20050	28146.7	24864.8	21905.3	33111.7	30356.5	31992.9
Q9GZT3	SRA stem-loop-interacting RNA-binding protein, mitochondrial	SLIRP	1.66509e+06	1.5567e+06	1.97922e+06	1.58176e+06	1.73997e+06	1.72513e+06	1583157	1672641	1.61724e+06
Q9GZS3	WD repeat-containing protein 61	WDR61	378231	381087	397160	328631	451382	429484	440882	442199	442418
Q9GZS1	DNA-directed RNA polymerase I subunit RPA49	POLR1E	543815	506132	562357	503674	524134	574337	502053	489731	478127
Q9GZR7	ATP-dependent RNA helicase DDX24	DDX24	498527	476396	556954	491115	511338	554188	417612	447914	426010
Q9GZR2	RNA exonuclease 4	REXO4	255426	284449	276861	254765	272149	267271	241672	229146	236481
Q9GZQ3	COMM domain-containing protein 5	COMMD5	223202	236423	204621	242272	247800	228261	248505	207490	218555
Q9GZP9	Derlin-2	DERL2	314025	276612	314540	479798	264388	513357	218367	462279	227230
Q9GZP4	PITH domain-containing protein 1	PITHD1	262709	263598	297259	257112	289064	292325	278579	288372	286992
Q9GZN8	UPF0687 protein C20orf27	C20orf27	747733	704565	867672	726806	697168	708945	629093	694401	666760
Q9GZN1	Actin-related protein 6	ACTR6	19651.4	20918.2	29934.8	30423	36176	36703.3	64294	75402.5	71814.5
Q9GZM8;Q9NXR1	Nuclear distribution protein nudE-like 1;Nuclear distribution protein nudE homolog 1	NDEL1	53562.6	37060.9	61546.1	54566.7	59415.6	56604.9	61447.5	54665.2	58895.6
Q9GZM5	Protein YIPF3	YIPF3	259809	255299	295023	324255	344565	301879	298032	312837	265041
Q9GZL7	Ribosome biogenesis protein WDR12	WDR12	890472	920157	1.07999e+06	863214	922008	943444	757407	861887	843123
Q9C0J8	pre-mRNA 3' end processing protein WDR33	WDR33	405200	369457	443156	506085	499820	454574	405740	368923	375637
Q9C0I1	Myotubularin-related protein 12	MTMR12	101726	108110	111047	93349.8	102354	106260	90861.3	99348.1	81799.2
Q9C0F0	Putative Polycomb group protein ASXL3	ASXL3	599519	569022	652628	508042	573233	579061	369976	515249	439509
Q9C0E8	Endoplasmic reticulum junction formation protein lunapark	LNPK	217170	211478	228830	281009	235740	234854	251701	288564	258660
Q9C0E2	Exportin-4	XPO4	337093	349803	383562	341843	379298	368088	313762	736484	274990
Q9C0D9	Ethanolaminephosphotransferase 1	SELENOI	3.26187e+06	2.7076e+06	3.96027e+06	3343206	3.52337e+06	3.24866e+06	2.89171e+06	3.04088e+06	2.05005e+06
Q9C0D5	Protein TANC1	TANC1	25101.4	24167	32990.1	27723.2	23970	24660.2	26626.1	27636.3	27612.2
Q9C0D3	Protein zyg-11 homolog B	ZYG11B	90931.9	98994.9	99850.6	120541	132074	117047	112397	72454.8	96270.9
Q9C0C9	(E3-independent) E2 ubiquitin-conjugating enzyme	UBE2O	233578	250531	212319	219763	206438	250217	244899	248475	253963
Q9C0C4	Semaphorin-4C	SEMA4C	641338	621476	326392	362405	456542	691696	583582	454216	574952
Q9C0C2	182 kDa tankyrase-1-binding protein	TNKS1BP1	678131	723199	790038	811143	788611	732651	782393	852605	797567
Q9C0B5	Palmitoyltransferase ZDHHC5	ZDHHC5	90128.7	104677	130300	146468	131422	168861	127899	111856	84856.1
Q9C0B1	Alpha-ketoglutarate-dependent dioxygenase FTO	FTO	137085	144720	134595	130423	124477	129663	149785	146313	147982
Q9C040	Tripartite motif-containing protein 2	TRIM2	120686	118748	117691	168994	131854	159831	154449	160052	162739
Q9C037	E3 ubiquitin-protein ligase TRIM4	TRIM4	381719	353037	378024	91821.3	489862	445991	517119	455542	463729
Q9C019	Tripartite motif-containing protein 15	TRIM15	68843.6	78654	99665.9	112963	111899	106951	71512	88107.8	71601.5
Q9C009	Forkhead box protein Q1	FOXQ1	160070	175227	184668	185057	146716	148706	183224	189539	198424
Q9C005	Protein dpy-30 homolog	DPY30	1452149	1.68576e+06	2.25473e+06	1.94134e+06	2.17569e+06	2.11148e+06	1422284	1.99955e+06	1.91813e+06
Q9C004	Protein sprouty homolog 4	SPRY4	28085.3	32354.1	34409.8	25956.2	42295.8	36017.1	29148.6	43246.3	45443.6
Q9C002	Normal mucosa of esophagus-specific gene 1 protein	NMES1	63478	66124.6	90459.7	151763	179019	154405	132309	135407	141052
Q9BZZ5	Apoptosis inhibitor 5	API5	4.41646e+06	4510957	5576326	4.79937e+06	4910104	4695459	4.36254e+06	4.51481e+06	4329625
Q9BZX2	Uridine-cytidine kinase 2	UCK2	7.04e+06	6.35387e+06	10299448	8115880	6976006	7.6546e+06	5.89091e+06	7878238	5.66953e+06
Q9BZV1	UBX domain-containing protein 6	UBXN6	54084.7	57119	43176.2	59883.5	68728.2	61321.1	63327.1	73465.4	66310.5
Q9BZQ8	Protein Niban 1	NIBAN1	36769.8	45490.6	59404.9	92950.2	83886.1	87830.5	136871	139410	137019
Q9BZQ6	ER degradation-enhancing alpha-mannosidase-like protein 3	EDEM3	120774	124246	113065	136318	125831	130995	111288	99902.4	114274
Q9BZL6	Serine/threonine-protein kinase D2	PRKD2	283050	282498	262156	337863	307069	296215	335674	343076	339359
Q9BZL4	Protein phosphatase 1 regulatory subunit 12C	PPP1R12C	414422	126720	87683.8	173379	203205	193553	174926	318425	187557
Q9BZL1	Ubiquitin-like protein 5	UBL5	623548	666388	759818	891270	862978	931457	759726	818944	816636
Q9BZK7	F-box-like/WD repeat-containing protein TBL1XR1	TBL1XR1	961944	930661	1.12614e+06	1.08377e+06	1.04407e+06	1.04601e+06	949814	984035	920512
Q9BZJ0	Crooked neck-like protein 1	CRNKL1	613052	583311	617367	578435	579014	575096	586862	565093	574398
Q9BZI7	Regulator of nonsense transcripts 3B	UPF3B	352993	378162	329867	355534	341594	334207	351558	353740	368874
Q9BZH6	WD repeat-containing protein 11	WDR11	342045	348834	311348	257313	219534	312444	352416	426039	422772
Q9BZG8	2-(3-amino-3-carboxypropyl)histidine synthase subunit 1	DPH1	176961	151378	163537	145004	168709	164267	142500	155083	131423
Q9BZF9	Uveal autoantigen with coiled-coil domains and ankyrin repeats	UACA	297432	271014	340243	271220	287279	288373	227422	251530	238032
Q9BZF1	Oxysterol-binding protein-related protein 8	OSBPL8	710877	748950	591599	588589	556496	654451	675127	699099	699984
Q9BZE9	Tether containing UBX domain for GLUT4	ASPSCR1	176548	215168	204264	216904	221727	236691	246635	252606	251976
Q9BZE4	Nucleolar GTP-binding protein 1	GTPBP4	2.39972e+06	2.33482e+06	2.70199e+06	2355792	2.46097e+06	2.30952e+06	1957897	2.0414e+06	2020921
Q9BZE1	39S ribosomal protein L37, mitochondrial	MRPL37	614505	571445	755117	695129	692349	692249	548877	585300	515995
Q9BZD4	Kinetochore protein Nuf2	NUF2	83490.5	87488.3	102192	97508.3	110236	94135.9	94374	109575	106949
Q9BZ95	Histone-lysine N-methyltransferase NSD3	NSD3	24502	22195.3	32654.4	257757	39990.8	35080.7	26785	31479.9	24106
Q9BZ67	FERM domain-containing protein 8	FRMD8	84232.7	74462.9	101685	117472	110985	116622	107025	105853	93541
Q9BYX4	Interferon-induced helicase C domain-containing protein 1	IFIH1	171974	190898	198410	263458	242819	251696	216683	252877	237041
Q9BYX2	TBC1 domain family member 2A	TBC1D2	146536	135224	129999	168606	165274	153260	181227	182047	186984
Q9BYV8	Centrosomal protein of 41 kDa	CEP41	41339.1	35806.1	47236.5	74938.6	64876.4	67289.5	51480.5	41998.2	44302.9
Q9BYT8	Neurolysin, mitochondrial	NLN	794657	806629	839287	797110	837442	856948	657296	702562	656341
Q9BYN8	28S ribosomal protein S26, mitochondrial	MRPS26	477643	472311	475062	437040	435032	531113	464263	572990	557414
Q9BYN0	Sulfiredoxin-1	SRXN1	736772	736962	861126	899776	974814	955656	820643	826793	809318
Q9BYM8	RanBP-type and C3HC4-type zinc finger-containing protein 1	RBCK1	72779.6	70590.7	77581	102001	115730	94176.5	101492	89288.2	81532.7
Q9BYK8	Helicase with zinc finger domain 2	HELZ2	78206.6	66423.7	66035.5	93557.1	96077.5	85230.6	63423.4	74271.1	73869.3
Q9BYJ9	YTH domain-containing family protein 1	YTHDF1	361736	385433	451607	402731	414418	381278	379471	370816	369837
Q9BYG5	Partitioning defective 6 homolog beta	PARD6B	339122	329860	363934	371881	351135	361860	297216	325391	328542
Q9BYG3	MKI67 FHA domain-interacting nucleolar phosphoprotein	NIFK	1.71878e+06	1.83349e+06	1.77621e+06	1.65182e+06	1.6819e+06	1.65459e+06	1.47094e+06	1.47044e+06	1.4415e+06
Q9BYD6	39S ribosomal protein L1, mitochondrial	MRPL1	360838	332558	324972	385277	361894	336495	284417	290966	306430
Q9BYD3	39S ribosomal protein L4, mitochondrial	MRPL4	650574	663823	727665	663291	682919	650111	606358	657675	628411
Q9BYD2	39S ribosomal protein L9, mitochondrial	MRPL9	771083	767571	821948	707995	802045	767592	704496	749606	732127
Q9BYD1	39S ribosomal protein L13, mitochondrial	MRPL13	545310	517351	572927	517206	558354	524315	459686	498124	475469
Q9BYC9	39S ribosomal protein L20, mitochondrial	MRPL20	456370	491887	446427	526794	462087	469954	492899	509032	506597
Q9BYC8	39S ribosomal protein L32, mitochondrial	MRPL32	119237	124596	122260	122748	109342	113984	116885	103940	107778
Q9BYC5	Alpha-(1,6)-fucosyltransferase	FUT8	79279.7	78158.5	89644.8	96249	104186	105936	86921.1	68042.4	88918.5
Q9BYB4	Guanine nucleotide-binding protein subunit beta-like protein 1	GNB1L	52525.3	55604.2	50474.8	57065.3	49477.5	56170.7	69752.7	67217.6	65340.9
Q9BY89	Uncharacterized protein KIAA1671	KIAA1671	19213	20139.4	24219.2	36684.4	33585.6	32063.8	27883.7	110066	22389.8
Q9BY77	Polymerase delta-interacting protein 3	POLDIP3	838850	854324	1.14638e+06	933269	978599	911579	789078	816254	793305
Q9BY50	Signal peptidase complex catalytic subunit SEC11C	SEC11C	173921	182231	135548	161440	164243	149415	172963	168393	191387
Q9BY44	Eukaryotic translation initiation factor 2A	EIF2A	2885744	2.81869e+06	3444675	2.76438e+06	2.84192e+06	2.6064e+06	2.33518e+06	2510587	2.41343e+06
Q9BY43	Charged multivesicular body protein 4a	CHMP4A	328983	315089	369017	409306	455248	393971	335704	371611	351205
Q9BY42	Replication termination factor 2	RTF2	133619	135295	179937	174134	159582	179369	129508	142345	135511
Q9BY32	Inosine triphosphate pyrophosphatase	ITPA	1482284	1.4568e+06	1.64456e+06	1.34679e+06	1.45425e+06	1.44433e+06	1395828	1.56661e+06	1.55846e+06
Q9BXY0	Protein MAK16 homolog	MAK16	709107	695027	770622	731519	815297	755800	610148	600176	611859
Q9BXW9	Fanconi anemia group D2 protein	FANCD2	237615	244462	276372	271948	268728	260090	219153	254123	267436
Q9BXW7	Haloacid dehalogenase-like hydrolase domain-containing 5	HDHD5	703151	722322	732547	638249	689221	646018	603050	623738	582686
Q9BXW6	Oxysterol-binding protein-related protein 1	OSBPL1A	70701	68897.6	81820.5	145011	93789.1	81253.2	108500	123239	116213
Q9BXT2	Voltage-dependent calcium channel gamma-6 subunit	CACNG6	3.31003e+06	3.39014e+06	3.52123e+06	3.60216e+06	3.92415e+06	4.03491e+06	3.9777e+06	4.1654e+06	4.19729e+06
Q9BXS6	Nucleolar and spindle-associated protein 1	NUSAP1	137858	120578	147973	220377	213798	220032	214726	199670	212926
Q9BXS5	AP-1 complex subunit mu-1	AP1M1	1.28845e+06	1.34043e+06	1.12248e+06	1538465	1.41977e+06	1.31659e+06	1.53851e+06	1.49715e+06	1509280
Q9BXS4	Transmembrane protein 59	TMEM59	64266.5	59808.7	61121.2	168823	114734	129160	85060.2	95829.6	86045.6
Q9BXR0	Queuine tRNA-ribosyltransferase catalytic subunit 1	QTRT1	345101	386088	395950	457950	425722	426644	351348	372857	366821
Q9BXP5	Serrate RNA effector molecule homolog	SRRT	1829668	1.93152e+06	2.10025e+06	1.74117e+06	1.92321e+06	2006619	1.72682e+06	1880162	1774509
Q9BXP2	Solute carrier family 12 member 9	SLC12A9	97723.1	89367.6	95561.9	91804.2	102796	115305	98213	104293	106407
Q9BXK5	Bcl-2-like protein 13	BCL2L13	338023	390546	386497	420584	419348	454091	325513	350466	336467
Q9BXK1	Krueppel-like factor 16	KLF16	72448	86523.7	100086	109730	112843	107639	76362.6	78814.1	71608.1
Q9BXJ9	N-alpha-acetyltransferase 15, NatA auxiliary subunit	NAA15	1.35407e+06	1.35226e+06	1.55712e+06	1.42565e+06	1.5241e+06	1.45905e+06	985510	1.08007e+06	1.07908e+06
Q9BXJ8	Ion channel TACAN	TMEM120A	73557	64121.9	68125.6	67434.1	70882.1	70304.9	101024	93581.9	92483
Q9BXI6	TBC1 domain family member 10A	TBC1D10A	36567.5	28630.6	34493.6	48003.1	46524.8	39352.4	37611.6	38066.7	36638.4
Q9BXF6	Rab11 family-interacting protein 5	RAB11FIP5	35134.3	36955.8	40923	56788.3	62256.4	48804.7	42206.8	39736.2	38598.5
Q9BXC9	Bardet-Biedl syndrome 2 protein	BBS2	7814.93	8785.13	3664.29	10406.5	5299.99	5961.98	16337.6	15547.8	15958.1
Q9BXB5	Oxysterol-binding protein-related protein 10	OSBPL10	289760	276240	217005	314729	274862	275810	261400	246703	250284
Q9BXB4	Oxysterol-binding protein-related protein 11	OSBPL11	280819	296928	241907	256909	253537	266050	264793	286782	284620
Q9BX95	Sphingosine-1-phosphate phosphatase 1	SGPP1	458533	548506	493121	594045	579152	514707	468342	501288	464785
Q9BX68	Histidine triad nucleotide-binding protein 2, mitochondrial	HINT2	583243	571756	670100	805062	838915	799616	902401	987893	978409
Q9BX66	Sorbin and SH3 domain-containing protein 1	SORBS1	84536.1	94721.2	109055	98885.3	90795.7	92053.3	103155	103079	113042
Q9BX46;Q9H0Z9	RNA-binding protein 24;RNA-binding protein 38	RBM24	41294.6	43236.2	34261.4	70373	38069.6	37577.6	38670.1	54742.9	41223.7
Q9BX40	Protein LSM14 homolog B	LSM14B	160903	180750	183507	190159	175457	184832	153865	201344	192979
Q9BWU0	Kanadaptin	SLC4A1AP	210241	202201	163585	246117	197980	206241	190790	192107	197414
Q9BWT3	Poly(A) polymerase gamma	PAPOLG	82928.7	92189.5	97103.2	121344	117915	114151	97435.8	105080	107314
Q9BWS9	Chitinase domain-containing protein 1	CHID1	165158	177869	193077	221360	238433	219184	250155	256495	250623
Q9BWQ6	Protein YIPF2	YIPF2	94889.3	97191.5	145970	76570.7	151283	234292	134385	255086	147059
Q9BWM7	Sideroflexin-3	SFXN3	707610	675064	793444	728000	742071	709201	733649	739488	729735
Q9BWJ5	Splicing factor 3B subunit 5	SF3B5	484397	511339	517638	558028	490673	536156	444444	422874	400531
Q9BWH6	RNA polymerase II-associated protein 1	RPAP1	127032	138870	133310	120491	138363	125070	134140	133462	126794
Q9BWF3	RNA-binding protein 4	RBM4	500408	465180	650284	651446	568011	577408	475640	461210	450990
Q9BWE0	Replication initiator 1	REPIN1	179835	200832	239768	212212	218244	219701	170039	207062	187237
Q9BWD1	Acetyl-CoA acetyltransferase, cytosolic	ACAT2	1.50785e+06	1.54671e+06	1.52646e+06	1.4811e+06	1.55797e+06	1.45622e+06	1.47522e+06	1.50318e+06	1.46574e+06
Q9BW92	Threonine--tRNA ligase, mitochondrial	TARS2	321554	334539	362131	314022	377438	365998	362759	374545	353475
Q9BW91	ADP-ribose pyrophosphatase, mitochondrial	NUDT9	435907	431823	522282	443775	504286	455884	453516	487576	462147
Q9BW85	Splicing factor YJU2	YJU2	251347	242210	304461	265440	296710	290258	186158	192211	194106
Q9BW83	Intraflagellar transport protein 27 homolog	IFT27	222415	230076	235803	359026	335465	322128	306947	322517	291295
Q9BW72	HIG1 domain family member 2A, mitochondrial	HIGD2A	539350	465340	645992	725341	774372	923834	464310	548166	426374
Q9BW71	HIRA-interacting protein 3	HIRIP3	168945	176470	192956	204976	222734	218407	181599	164388	176557
Q9BW61	DET1- and DDB1-associated protein 1	DDA1	162906	179675	187710	201007	214236	211670	173304	192025	177794
Q9BW60	Elongation of very long chain fatty acids protein 1	ELOVL1	214226	205702	234136	241202	261044	260636	141291	128206	124153
Q9BW27	Nuclear pore complex protein Nup85	NUP85	442083	442788	492380	445069	377411	463409	376189	413083	405566
Q9BW19	Kinesin-like protein KIFC1	KIFC1	159777	161410	169126	311657	306407	292370	287924	285501	307753
Q9BW04	Specifically androgen-regulated gene protein	SARG	106080	111770	148938	139451	143694	134536	121823	142533	127407
Q9BVX2	Transmembrane protein 106C	TMEM106C	94994.2	87072	115542	117567	121725	129429	125365	98882.7	20121.4
Q9BVW5	TIMELESS-interacting protein	TIPIN	69481.7	72622.5	51889.9	74533.4	64332.5	72775.9	57580.5	56086.3	55510.1
Q9BVV7	Mitochondrial import inner membrane translocase subunit Tim21	TIMM21	262271	271767	413637	262625	278135	274292	218510	207276	204009
Q9BVT8	Transmembrane and ubiquitin-like domain-containing protein 1	TMUB1	323951	350790	364405	498280	479581	464816	332111	326141	318800
Q9BVS4	Serine/threonine-protein kinase RIO2	RIOK2	111483	119519	85676.8	104857	99935.5	97038.8	108432	104079	109781
Q9BVQ7	Spermatogenesis-associated protein 5-like protein 1	SPATA5L1	254020	234697	214357	241918	220179	227761	228813	223912	243871
Q9BVP2	Guanine nucleotide-binding protein-like 3	GNL3	2.20995e+06	2.1018e+06	2.36948e+06	2.06225e+06	2.09973e+06	1.94628e+06	1.70998e+06	1.75872e+06	1776636
Q9BVM2	Protein DPCD	DPCD	126847	125834	112121	129051	137086	131247	137635	135892	143264
Q9BVL2	Nucleoporin p58/p45	NUP58	205619	229218	261927	247426	252229	233452	201164	220961	201035
Q9BVK8	Transmembrane protein 147	TMEM147	290413	283556	272799	317629	235086	270370	217567	257688	245127
Q9BVK6	Transmembrane emp24 domain-containing protein 9	TMED9	2.22874e+06	2.10879e+06	2.39795e+06	2.08544e+06	2.31056e+06	2223596	2.45092e+06	2.19021e+06	2210609
Q9BVK2	Probable dolichyl pyrophosphate Glc1Man9GlcNAc2 alpha-1,3-glucosyltransferase	ALG8	316010	288694	361808	314078	341990	353330	307033	324205	318772
Q9BVJ7	Dual specificity protein phosphatase 23	DUSP23	160402	167037	194545	178336	103760	183893	135130	172538	152523
Q9BVJ6	U3 small nucleolar RNA-associated protein 14 homolog A	UTP14A	712313	694307	662362	695086	653039	645184	546091	569260	558557
Q9BVI4	Nucleolar complex protein 4 homolog	NOC4L	346985	337204	346993	304769	297312	308750	295199	298633	297617
Q9BVG9	Phosphatidylserine synthase 2	PTDSS2	297478	300967	362176	389617	377011	359966	314605	364580	359437
Q9BVG4	Protein PBDC1	PBDC1	219178	218180	259229	395581	402519	360858	197576	216592	202552
Q9BVC6	Transmembrane protein 109	TMEM109	1.94835e+06	1.95455e+06	2.36474e+06	2.13418e+06	2.3684e+06	2.11059e+06	1.91977e+06	1.98148e+06	1.87398e+06
Q9BVC3	Sister chromatid cohesion protein DCC1	DSCC1	204548	196752	224562	190064	199105	200732	205524	216932	193323
Q9BVA0	Katanin p80 WD40 repeat-containing subunit B1	KATNB1	51934.1	45307.6	51570	46497.8	59780.2	54999.4	54316.1	56761.2	61517
Q9BV86	N-terminal Xaa-Pro-Lys N-methyltransferase 1	NTMT1	969773	910941	891862	824128	851751	831453	784788	772820	816854
Q9BV79	Enoyl-[acyl-carrier-protein] reductase, mitochondrial	MECR	33891.6	31921.9	40974.2	40409.2	44778	43699.1	47943.8	45486.4	42815
Q9BV73	Centrosome-associated protein CEP250	CEP250	19463.2	18840.2	10705.8	20761.5	18353.3	16977.2	17436.5	17727.7	19087.8
Q9BV68	E3 ubiquitin-protein ligase RNF126	RNF126	345150	427266	516475	328474	314686	418177	358544	403578	381504
Q9BV57	1,2-dihydroxy-3-keto-5-methylthiopentene dioxygenase	ADI1	587150	695738	778380	333970	342862	321202	456717	468491	456578
Q9BV44	THUMP domain-containing protein 3	THUMPD3	260741	257487	269458	277256	248827	277437	275218	296494	264073
Q9BV40	Vesicle-associated membrane protein 8	VAMP8	443518	424702	499690	516662	508457	470244	489790	425002	477370
Q9BV38	WD repeat-containing protein 18	WDR18	716966	715634	784628	734438	765915	821131	657024	714986	698555
Q9BV36	Melanophilin	MLPH	48884.3	51428.2	51938.6	100760	90345.2	88108.6	73646.3	82483.9	86399.3
Q9BV23	Monoacylglycerol lipase ABHD6	ABHD6	192002	187423	172343	246547	212884	218899	177434	189214	185978
Q9BV19	Uncharacterized protein C1orf50	C1orf50	94125.8	91309	106337	95908.9	103320	110109	82992.5	84715.2	79914.5
Q9BUZ4	TNF receptor-associated factor 4	TRAF4	47686.7	29277	61542.5	50005.4	49063.4	63582.8	35277.6	56618	23183.7
Q9BUT9	MAPK regulated corepressor interacting protein 2	MCRIP2	38542.4	37535.3	47963.8	32514.5	30114.5	39407.9	27922.4	33463.7	35466.4
Q9BUT1	3-hydroxybutyrate dehydrogenase type 2	BDH2	130687	125795	126045	182697	167496	175179	269112	261201	247927
Q9BUR5	MICOS complex subunit MIC26	APOO	515944	548205	625967	659076	600210	607119	592628	659589	607878
Q9BUR4	Telomerase Cajal body protein 1	WRAP53	100943	93312.3	105008	143516	128611	102740	94555	89213.8	86869.5
Q9BUQ8	Probable ATP-dependent RNA helicase DDX23	DDX23	1.12711e+06	1.19344e+06	1.20114e+06	1.06878e+06	1.06925e+06	1.14707e+06	1.07894e+06	1062929	1089597
Q9BUP3	Oxidoreductase HTATIP2	HTATIP2	888496	784694	701990	813077	806917	805936	972717	848064	902222
Q9BUN8	Derlin-1	DERL1	651219	704687	579739	627138	359855	624736	650325	579638	666317
Q9BUM1	Glucose-6-phosphatase 3	G6PC3	192104	169731	73318.7	121497	91623.2	116508	179110	130960	189387
Q9BUL8	Programmed cell death protein 10	PDCD10	989086	949274	1.15485e+06	1.04718e+06	1163701	977267	1073660	1146339	1105106
Q9BUL5	PHD finger protein 23	PHF23	158446	165094	180601	231924	215577	204458	159717	170695	181170
Q9BUK6	Protein misato homolog 1	MSTO1	155032	145717	152381	157271	156999	156891	151456	156658	145961
Q9BUJ2	Heterogeneous nuclear ribonucleoprotein U-like protein 1	HNRNPUL1	1.9004e+06	1.72043e+06	1.93168e+06	1.91097e+06	2.0035e+06	2.01336e+06	1.83764e+06	1.87774e+06	1.88255e+06
Q9BUI4	DNA-directed RNA polymerase III subunit RPC3	POLR3C	128951	108209	125821	129512	147931	133622	105662	110514	132606
Q9BUH6	Protein PAXX	PAXX	323801	325537	359164	315599	351219	348570	358344	380024	385357
Q9BUF7	Protein crumbs homolog 3	CRB3	48068.6	50995.3	51981.8	111567	98235.3	73981.5	43872.8	22537.5	29364
Q9BUF5	Tubulin beta-6 chain	TUBB6	2.75793e+06	2.22365e+06	3.312e+06	1.23035e+06	2.84227e+06	1871411	2356405	2.73232e+06	1149426
Q9BUE0	Mediator of RNA polymerase II transcription subunit 18	MED18	29298.7	27145.5	17881.1	35105.2	26669.4	20566.4	23239.5	25491.5	14382.2
Q9BUB7	Transmembrane protein 70, mitochondrial	TMEM70	557450	562258	448430	527878	474172	485986	525087	534986	578643
Q9BU89	Deoxyhypusine hydroxylase	DOHH	464160	466625	447749	398879	385078	342881	298852	335777	308883
Q9BU76	Multiple myeloma tumor-associated protein 2	MMTAG2	177802	158833	182018	174596	156550	181369	156335	157739	166142
Q9BU61	NADH dehydrogenase [ubiquinone] 1 alpha subcomplex assembly factor 3	NDUFAF3	802302	799820	936623	874580	853842	818986	743762	788888	746006
Q9BU23	Lipase maturation factor 2	LMF2	277342	275198	322900	330842	352590	408444	312547	344337	316915
Q9BU19	Zinc finger protein 692	ZNF692	13368946	14012332	17207290	2.77419e+06	15809053	16032000	13773481	15476296	14747375
Q9BU02	Thiamine-triphosphatase	THTPA	89911.8	77120.8	86087.2	93875.7	97387.3	113124	100776	96224.2	103721
Q9BTY7	Protein HGH1 homolog	HGH1	460941	458271	532881	419818	457351	433977	381249	402682	375370
Q9BTY2	Plasma alpha-L-fucosidase	FUCA2	805910	836917	905447	1.013e+06	1.01408e+06	978895	1142076	1.15821e+06	1133681
Q9BTX7	Alpha-tocopherol transfer protein-like	TTPAL	119380	114259	83871.4	85361	133757	119681	161385	146451	179421
Q9BTX3	Transmembrane protein 208	TMEM208	122257	122476	154375	122586	187173	193403	146090	163931	139757
Q9BTX1	Nucleoporin NDC1	NDC1	350791	358453	631219	936140	324199	1.09791e+06	262244	286238	266810
Q9BTW9	Tubulin-specific chaperone D	TBCD	254938	280053	303886	266361	265093	284004	282312	310016	293430
Q9BTV4	Transmembrane protein 43	TMEM43	1.46843e+06	1.45915e+06	1.68552e+06	1.57943e+06	1.77433e+06	1.65036e+06	1.62416e+06	1.71942e+06	1.69003e+06
Q9BTU6	Phosphatidylinositol 4-kinase type 2-alpha	PI4K2A	179262	170124	162994	203878	221467	198912	198336	187643	191549
Q9BTT6	Leucine-rich repeat-containing protein 1	LRRC1	318802	355388	316448	350941	370956	389237	386416	424687	390814
Q9BTT4	Mediator of RNA polymerase II transcription subunit 10	MED10	175683	156840	133528	150914	126384	131273	158873	159844	177966
Q9BTT0	Acidic leucine-rich nuclear phosphoprotein 32 family member E	ANP32E	1.85161e+06	2.01492e+06	1752162	1.62436e+06	1.5889e+06	1540187	1.92908e+06	1.9065e+06	2.07527e+06
Q9BTL3	RNA guanine-N7 methyltransferase activating subunit	RAMAC	387206	412057	411664	410129	411659	387314	373020	443993	443198
Q9BTF0	THUMP domain-containing protein 2	THUMPD2	30846.7	23153.5	29739.7	30150.3	33545.5	23138.1	26861.4	31508.5	25221.2
Q9BTE7	DCN1-like protein 5	DCUN1D5	634666	619185	561589	631375	618075	592118	531977	511810	542013
Q9BTE6	Alanyl-tRNA editing protein Aarsd1	AARSD1	391425	345157	285064	183264	158418	164312	308267	268928	298741
Q9BTE3	Mini-chromosome maintenance complex-binding protein	MCMBP	485554	503537	524949	461436	410985	440731	374068	441946	461058
Q9BTE1	Dynactin subunit 5	DCTN5	199059	205834	226111	229330	227757	246264	222574	239149	224553
Q9BTD8	RNA-binding protein 42	RBM42	233212	256418	280686	274810	259442	262330	229082	246689	223413
Q9BTC8	Metastasis-associated protein MTA3	MTA3	570800	553683	452933	552584	500131	506376	599633	506619	559265
Q9BTC0	Death-inducer obliterator 1	DIDO1	313421	313459	428115	384894	405348	374534	310161	340674	310166
Q9BTA9	WW domain-containing adapter protein with coiled-coil	WAC	81590.7	79514.4	86819.5	93346.5	97521.9	88256.9	97276.9	82317.1	80631.6
Q9BT78	COP9 signalosome complex subunit 4	COPS4	1314764	1.29359e+06	1390095	1.38276e+06	1.38512e+06	1.28452e+06	1.23067e+06	1.30359e+06	1275868
Q9BT73	Proteasome assembly chaperone 3	PSMG3	71295.1	72435.7	111161	67532.9	67052.4	67757.2	76843.9	82688.3	77542.8
Q9BT30	Alpha-ketoglutarate-dependent dioxygenase alkB homolog 7, mitochondrial	ALKBH7	27857	28954.7	32701.7	59232.5	55646.6	53632.6	41610.3	50264.6	43626.4
Q9BT25	HAUS augmin-like complex subunit 8	HAUS8	98135.6	93826.5	132821	109554	114280	107343	82588.7	93749.5	104058
Q9BT22	Chitobiosyldiphosphodolichol beta-mannosyltransferase	ALG1	491683	532974	513091	474180	513926	534491	490273	492747	429548
Q9BT17	Mitochondrial ribosome-associated GTPase 1	MTG1	108892	112668	115013	104685	104028	99667.7	88930.9	94251.6	95684.5
Q9BT09	Protein canopy homolog 3	CNPY3	969938	1.00999e+06	991376	1.40462e+06	1.32677e+06	1.31069e+06	1.00742e+06	1.03282e+06	310405
Q9BSY4	Coiled-coil-helix-coiled-coil-helix domain-containing protein 5	CHCHD5	280968	318513	335530	342403	408002	339303	314564	370587	351177
Q9BSV6	tRNA-splicing endonuclease subunit Sen34	TSEN34	400158	449783	346735	466901	421575	451783	458079	445275	473479
Q9BST9	Rhotekin	RTKN	872921	892062	956329	833191	820477	848378	782785	873624	820407
Q9BSR8	Protein YIPF4	YIPF4	312928	331003	393709	394741	386903	362483	324855	408908	356803
Q9BSJ8	Extended synaptotagmin-1	ESYT1	2.00524e+06	1.90517e+06	1.81696e+06	1774405	1.8931e+06	1.92028e+06	1966040	1.96621e+06	2.0493e+06
Q9BSJ2	Gamma-tubulin complex component 2	TUBGCP2	312307	378894	423767	206923	225206	206377	145677	478442	496495
Q9BSH5	Haloacid dehalogenase-like hydrolase domain-containing protein 3	HDHD3	262742	227299	238959	242762	259151	191856	292571	277100	315017
Q9BSH4	Translational activator of cytochrome c oxidase 1	TACO1	183186	177130	165919	193375	200613	179769	173828	170853	168163
Q9BSG0	Protease-associated domain-containing protein 1	PRADC1	42881.4	41222.3	21714	44797.7	32589.4	35570.3	52962	40086.7	47177.9
Q9BSF4	Mitochondrial import inner membrane translocase subunit Tim29	TIMM29	115699	119440	100942	120858	111131	104390	159174	149209	164687
Q9BSE5	Agmatinase, mitochondrial	AGMAT	62298.1	50072.1	63375.8	58665.2	64592.6	67327	44913.2	44498	32237.4
Q9BSD7	Cancer-related nucleoside-triphosphatase	NTPCR	607281	301233	649218	347826	371698	695027	592842	348135	626911
Q9BSC4	Nucleolar protein 10	NOL10	452605	418434	470439	438434	443352	436982	336141	407770	368725
Q9BS40	Latexin	LXN	40387	39769.7	43601.1	66477.8	69347.2	74874.7	72188.5	80729.8	54817.8
Q9BS26	Endoplasmic reticulum resident protein 44	ERP44	1.91933e+06	1.97397e+06	2.18242e+06	2.22232e+06	2.31293e+06	2.29655e+06	2.14579e+06	2235843	2.12679e+06
Q9BRZ2	E3 ubiquitin-protein ligase TRIM56	TRIM56	143997	141111	163018	150664	168750	170341	153525	120832	147225
Q9BRX9	WD repeat domain-containing protein 83	WDR83	8666.36	11414.3	11034	6709.52	6726.62	7573.85	10365.8	11534.4	11913.6
Q9BRX8	Peroxiredoxin-like 2A	PRXL2A	245877	251302	177812	254986	246032	259549	379822	341136	375352
Q9BRX5	DNA replication complex GINS protein PSF3	GINS3	325702	317525	276311	327263	263570	276156	290369	274897	292298
Q9BRX2	Protein pelota homolog	PELO	696286	716251	701823	729405	701325	697989	756299	722976	757396
Q9BRV3	Sugar transporter SWEET1	SLC50A1	724864	722207	654177	810568	693284	679894	1.15671e+06	1.00745e+06	1.04205e+06
Q9BRU9	rRNA-processing protein UTP23 homolog	UTP23	130924	135826	154880	72506.2	96348.3	130030	82783.6	94045.5	96344.1
Q9BRT9	DNA replication complex GINS protein SLD5	GINS4	297161	290031	303268	282080	273683	249260	249219	250906	238059
Q9BRT8	COBW domain-containing protein 1	CBWD1	247277	231136	260100	227062	259367	253139	241033	263976	243178
Q9BRT6	Protein LLP homolog	LLPH	188611	173075	182507	166020	140787	139956	139524	145159	133802
Q9BRT3	Migration and invasion enhancer 1	MIEN1	438985	456204	512915	458596	566129	513082	449723	492217	501589
Q9BRT2	Ubiquinol-cytochrome-c reductase complex assembly factor 2	UQCC2	195998	194903	210374	181828	438155	433253	653078	691166	706300
Q9BRS2	Serine/threonine-protein kinase RIO1	RIOK1	289625	270742	340234	274205	275308	279661	210632	211202	216676
Q9BRR6	ADP-dependent glucokinase	ADPGK	467528	450163	474983	446879	482680	475203	381797	434090	386827
Q9BRQ8	Ferroptosis suppressor protein 1	AIFM2	1.17365e+06	1.17613e+06	1328768	1.2645e+06	1.34045e+06	1.2044e+06	1.31894e+06	1.31758e+06	1.31906e+06
Q9BRQ6	MICOS complex subunit MIC25	CHCHD6	91259.3	93580.4	60887.9	90371.6	82766	76464.8	108719	89304	106884
Q9BRP8	Partner of Y14 and mago	PYM1	2856739	2.95283e+06	3.09051e+06	2810494	2.85933e+06	3.32183e+06	2960230	3370454	3.2684e+06
Q9BRP4	Proteasomal ATPase-associated factor 1	PAAF1	259666	250342	258450	339334	296099	301326	379044	405318	387631
Q9BRP1	Programmed cell death protein 2-like	PDCD2L	239773	244610	251620	222135	218512	224017	209435	217754	206564
Q9BRL6	Serine/arginine-rich splicing factor 8	SRSF8	25765.8	26789.6	29180.8	25842.3	29980.4	27165.6	24008.3	29919.7	26819.7
Q9BRK5	45 kDa calcium-binding protein	SDF4	364882	364897	416308	376060	392220	337418	477724	430478	429007
Q9BRJ7	Tudor-interacting repair regulator protein	NUDT16L1	364194	382106	351153	351714	347933	338794	322179	334929	339270
Q9BRJ6	Uncharacterized protein C7orf50	C7orf50	1.31277e+06	1.32899e+06	1.37533e+06	1.19663e+06	1.22584e+06	1.26998e+06	1.10341e+06	1077438	1.08794e+06
Q9BRJ2	39S ribosomal protein L45, mitochondrial	MRPL45	542795	574970	657595	580026	600557	592885	494539	529736	530507
Q9BRG2	SH2 domain-containing protein 3A	SH2D3A	64669.4	70936.6	108578	121480	112112	82815.6	85342.6	74040.2	72115.7
Q9BRG1	Vacuolar protein-sorting-associated protein 25	VPS25	225362	233842	262769	254710	267984	271982	261733	274554	273178
Q9BRF8	Serine/threonine-protein phosphatase CPPED1	CPPED1	720984	678120	878594	666613	767475	720292	605783	681777	649652
Q9BRD0	BUD13 homolog	BUD13	208756	216398	238979	414709	227922	223547	185115	207904	191510
Q9BRA2	Thioredoxin domain-containing protein 17	TXNDC17	4.8063e+06	4869899	5.67393e+06	4435127	4.77207e+06	4681465	4219864	4238572	4.16131e+06
Q9BRA0	N-alpha-acetyltransferase 38, NatC auxiliary subunit	NAA38	324351	326493	369965	288374	323138	326524	326403	277041	262959
Q9BR76	Coronin-1B	CORO1B	1.51293e+06	1.55082e+06	1.58318e+06	1.6562e+06	1.71647e+06	1.77563e+06	1.51199e+06	1637473	1.55585e+06
Q9BR61	Acyl-CoA-binding domain-containing protein 6	ACBD6	35017.1	33709.7	27143.5	29376.8	27653.2	28693.9	38201.5	36125.4	39467.1
Q9BQS8	FYVE and coiled-coil domain-containing protein 1	FYCO1	108541	118624	117552	82930.5	120265	139357	142390	173996	182551
Q9BQP7	Mitochondrial genome maintenance exonuclease 1	MGME1	273302	282222	241490	252865	207480	218751	292170	285351	316413
Q9BQL6	Fermitin family homolog 1	FERMT1	259024	255403	315760	253645	292633	252439	242511	311722	260556
Q9BQI0	Allograft inflammatory factor 1-like	AIF1L	110679	112485	108108	119916	117854	100592	101446	90794.3	82786.9
Q9BQG2	Peroxisomal NADH pyrophosphatase NUDT12	NUDT12	135944	101259	112698	88718.7	98716.3	104160	106579	96674	109677
Q9BQG0	Myb-binding protein 1A	MYBBP1A	1.7493e+06	1.74471e+06	1.71247e+06	1614687	1.53608e+06	1.63542e+06	1.46824e+06	1.52058e+06	1.51932e+06
Q9BQE5	Apolipoprotein L2	APOL2	450646	479054	554104	549407	601984	584363	508819	504554	485431
Q9BQE4	Selenoprotein S	SELENOS	64716.4	70867.5	99494.1	113092	122724	119237	82065.8	100834	103154
Q9BQE3	Tubulin alpha-1C chain	TUBA1C	9251847	7995274	4054734	7659877	4720671	5.08681e+06	9123476	6423620	7654529
Q9BQD7	Adenine nucleotide translocase lysine N-methyltransferase	ANTKMT	14584.5	11763.3	40518.4	18609	18910.1	22426.2	17844.8	13308.8	14211.7
Q9BQD3	KxDL motif-containing protein 1	KXD1	56271.3	49176.3	58659.5	67136.4	61486.2	76582.9	69999.9	85099	67284.4
Q9BQC6	Ribosomal protein 63, mitochondrial	MRPL57	165655	161900	188867	218712	197857	187738	162586	158469	160454
Q9BQC3	2-(3-amino-3-carboxypropyl)histidine synthase subunit 2	DPH2	197207	183638	245611	199476	207710	199984	149548	164306	163940
Q9BQB6	Vitamin K epoxide reductase complex subunit 1	VKORC1	733598	691033	862938	812217	876440	813771	757724	808038	818508
Q9BQA9	Cytochrome b-245 chaperone 1	CYBC1	76099.9	80917.9	62850	79473.4	72336.9	84336.7	111537	103235	113880
Q9BQA1	Methylosome protein 50	WDR77	2.96845e+06	2.93823e+06	3.56832e+06	2.9068e+06	3063375	2.87399e+06	2609764	2.79808e+06	2.4249e+06
Q9BQ95	Evolutionarily conserved signaling intermediate in Toll pathway, mitochondrial	ECSIT	288252	322577	244686	270734	243043	253501	251956	254899	297210
Q9BQ75	Protein CMSS1	CMSS1	1.55864e+06	1.59658e+06	1700826	1.28609e+06	1.39626e+06	1.45786e+06	1.49041e+06	1.50264e+06	1.42775e+06
Q9BQ70	Transcription factor 25	TCF25	40870.7	50743	43430.3	50920.6	47811.5	45422.3	40760.3	40489.4	51388.9
Q9BQ67	Glutamate-rich WD repeat-containing protein 1	GRWD1	1.45192e+06	1.429e+06	1.33192e+06	1.36215e+06	1.29667e+06	1.34445e+06	1.23671e+06	1.27478e+06	1.32063e+06
Q9BQ61	Telomerase RNA component interacting RNase	TRIR	412745	404180	455380	397552	397091	502848	414236	467634	463154
Q9BQ52	Zinc phosphodiesterase ELAC protein 2	ELAC2	1.19911e+06	1.23113e+06	1.25348e+06	1.16885e+06	1.11367e+06	1.06713e+06	1065759	1.15837e+06	1.05854e+06
Q9BQ48	39S ribosomal protein L34, mitochondrial	MRPL34	489383	489227	489404	555174	536260	571717	469211	500250	475731
Q9BQ39	ATP-dependent RNA helicase DDX50	DDX50	380642	378240	354109	380579	340938	354455	393837	390667	393802
Q9BQ24	Zinc finger FYVE domain-containing protein 21	ZFYVE21	26794.5	47577.3	48947.8	72069.8	70245.5	56220.1	50436.8	67018.1	53837.3
Q9BQ15	SOSS complex subunit B1	NABP2	168918	161418	160929	162087	170167	168609	146796	172373	170902
Q9BQ04	RNA-binding protein 4B	RBM4B	1.43343e+06	1509769	1.40604e+06	1.59609e+06	1.41888e+06	1.41937e+06	1.42975e+06	1.46883e+06	1.48916e+06
Q9BPY3	Protein FAM118B	FAM118B	95491.9	80657.2	94353.7	76340.3	75999.7	114578	81831.1	69062.4	79486.4
Q9BPX6	Calcium uptake protein 1, mitochondrial	MICU1	57976	57790.2	50984.6	63763.9	52690	49809.2	62780.7	62543.1	60921.9
Q9BPX5	Actin-related protein 2/3 complex subunit 5-like protein	ARPC5L	1530385	1.45758e+06	1.25077e+06	1344324	1.29955e+06	1.06826e+06	1.42297e+06	1.36099e+06	1.49313e+06
Q9BPX3	Condensin complex subunit 3	NCAPG	1.10804e+06	1.11837e+06	1347431	1.0594e+06	1.16537e+06	1.1337e+06	936110	1.00534e+06	962344
Q9BPW8	Protein NipSnap homolog 1	NIPSNAP1	804440	809473	727877	1.0322e+06	886271	786186	1.15031e+06	1134183	1.10084e+06
Q99996	A-kinase anchor protein 9	AKAP9	76712.4	73346.2	90038.9	105860	84695.5	83736.5	75507.9	80836.4	75703.2
Q99988	Growth/differentiation factor 15	GDF15	167031	156191	230815	210423	269545	231681	112140	142753	122793
Q99986	Serine/threonine-protein kinase VRK1	VRK1	1.8261e+06	1.85319e+06	2.21095e+06	1850114	1.73976e+06	1.54234e+06	1.87795e+06	2.33226e+06	2.09967e+06
Q99962	Endophilin-A1	SH3GL2	1.0915e+06	1.14066e+06	1.15516e+06	1.26131e+06	1.21247e+06	1.28598e+06	1.15194e+06	1.14994e+06	1.1864e+06
Q99961	Endophilin-A2	SH3GL1	856610	832947	943825	868111	924175	887671	813312	867353	814540
Q99959	Plakophilin-2	PKP2	935209	1002362	1.05569e+06	968680	1.11905e+06	1.13196e+06	1.09091e+06	1.13194e+06	1.0783e+06
Q99943	1-acyl-sn-glycerol-3-phosphate acyltransferase alpha	AGPAT1	94854.4	110380	94888.8	153822	131332	133730	170395	143693	140392
Q99933	BAG family molecular chaperone regulator 1	BAG1	162145	169498	154294	144233	140858	145156	140255	134451	141332
Q99873	Protein arginine N-methyltransferase 1	PRMT1	6.07463e+06	5.7822e+06	4749188	5.37945e+06	4739376	4684928	5064875	4431209	4.76827e+06
Q99871	HAUS augmin-like complex subunit 7	HAUS7	42847.4	39567.1	30051.9	37622	29051.4	32349.2	29685.8	32736.1	32066.4
Q99856	AT-rich interactive domain-containing protein 3A	ARID3A	205433	205618	260335	298764	291296	293452	209716	190135	170319
Q99848	Probable rRNA-processing protein EBP2	EBNA1BP2	1.86034e+06	1.73271e+06	1.81263e+06	1.67561e+06	1.71843e+06	1.732e+06	1.42783e+06	1.4323e+06	1.43639e+06
Q99836	Myeloid differentiation primary response protein MyD88	MYD88	58387.1	63145.5	72630.8	58632	64497.2	57276.8	55717.8	67136.8	67766.4
Q99832	T-complex protein 1 subunit eta	CCT7	6882855	6.99231e+06	7.01797e+06	6.52814e+06	7.26003e+06	7055751	6.21077e+06	6.3611e+06	6186141
Q99829	Copine-1	CPNE1	1.09348e+06	903846	1125099	917266	1.03746e+06	1.09431e+06	1.32359e+06	1243054	1.29491e+06
Q99828	Calcium and integrin-binding protein 1	CIB1	84009.3	83830.9	83247.7	116984	135298	124435	150439	143480	144148
Q99816	Tumor susceptibility gene 101 protein	TSG101	334904	331243	342374	352990	372057	333131	286835	314101	294584
Q99808	Equilibrative nucleoside transporter 1	SLC29A1	266900	285748	339104	363196	373883	402716	275699	309700	289273
Q99807	5-demethoxyubiquinone hydroxylase, mitochondrial	COQ7	109149	116259	117578	125994	136271	122168	111255	113000	121641
Q99805	Transmembrane 9 superfamily member 2	TM9SF2	1.61674e+06	1645653	1.74736e+06	1.88182e+06	1.77529e+06	1771352	1382671	1653308	1.57163e+06
Q99798	Aconitate hydratase, mitochondrial	ACO2	2.38975e+06	2.28515e+06	2.89837e+06	2.40778e+06	2.75856e+06	2.60681e+06	2.77328e+06	2.8344e+06	2.75953e+06
Q99797	Mitochondrial intermediate peptidase	MIPEP	393645	404405	353483	386204	379684	370123	417882	405938	357800
Q99766	ATP synthase subunit s, mitochondrial	DMAC2L	156087	154435	110331	142159	117164	113420	190661	169693	189095
Q99757	Thioredoxin, mitochondrial	TXN2	179418	181205	58403.1	150362	72607.6	86712.5	194225	116816	161608
Q99755	Phosphatidylinositol 4-phosphate 5-kinase type-1 alpha	PIP5K1A	143467	139266	165847	151957	169353	159712	161743	135094	160100
Q99747	Gamma-soluble NSF attachment protein	NAPG	835410	817625	804614	937204	886581	879860	986487	1.01015e+06	1.02503e+06
Q99735	Microsomal glutathione S-transferase 2	MGST2	3791360	3.45004e+06	3.79061e+06	4.80511e+06	4858836	4.51737e+06	3445036	3.02224e+06	2.95306e+06
Q99733	Nucleosome assembly protein 1-like 4	NAP1L4	5.73174e+06	5.78434e+06	5.70838e+06	5.92613e+06	5.62056e+06	5.38375e+06	5700220	5299768	5.07535e+06
Q99732	Lipopolysaccharide-induced tumor necrosis factor-alpha factor	LITAF	52450.7	49787.8	54362.3	48436.6	56576	52792.7	67411.1	76848.5	72138.3
Q99729	Heterogeneous nuclear ribonucleoprotein A/B	HNRNPAB	2.57683e+06	2674671	2.35679e+06	2.48002e+06	2.23134e+06	2359959	2.29914e+06	1.85135e+06	2082274
Q99720	Sigma non-opioid intracellular receptor 1	SIGMAR1	917886	928522	977996	922064	972602	950774	896288	966442	949952
Q99717	Mothers against decapentaplegic homolog 5	SMAD5	73177.5	82586.2	94739.8	72913.5	77579.3	90672.5	64150	105728	91754.6
Q99714	3-hydroxyacyl-CoA dehydrogenase type-2	HSD17B10	3.28346e+06	3.2353e+06	3.90593e+06	3.40259e+06	3552302	3499429	3372625	3577852	3.60804e+06
Q99707	Methionine synthase	MTR	31489.9	33346.4	46307.1	52751.6	58157	48434.7	32608.2	41140.1	38113.6
Q99704	Docking protein 1	DOK1	102376	97034.9	109480	112948	122732	116913	106110	115132	113163
Q99700	Ataxin-2	ATXN2	294284	290302	299362	296709	306770	318094	240698	253915	251710
Q99666	RANBP2-like and GRIP domain-containing protein 5/6	RGPD5	1.23719e+06	1.22195e+06	1.39809e+06	1.31377e+06	1.22854e+06	1.23206e+06	1.21476e+06	1.28289e+06	1149285
Q99661	Kinesin-like protein KIF2C	KIF2C	503022	528148	472255	596680	492519	494877	578003	560053	591824
Q99653	Calcineurin B homologous protein 1	CHP1	812063	842623	875268	1.00596e+06	1.07075e+06	983427	859220	871779	849920
Q99643	Succinate dehydrogenase cytochrome b560 subunit, mitochondrial	SDHC	424391	416100	243228	386728	346583	295116	539086	398975	465372
Q99640	Membrane-associated tyrosine- and threonine-specific cdc2-inhibitory kinase	PKMYT1	174460	163311	144489	135762	131621	142932	132742	151143	157743
Q99638	Cell cycle checkpoint control protein RAD9A	RAD9A	44556.3	47535.7	40204	39938.9	42826.2	58609.5	48400.7	64339.4	54548.7
Q99633	Pre-mRNA-splicing factor 18	PRPF18	74238.2	69505.9	66172.6	79215	89299.8	62103.1	55372.6	64567.2	73986.2
Q99627	COP9 signalosome complex subunit 8	COPS8	889924	844801	1.06012e+06	1025935	1.05881e+06	942666	847896	802269	785621
Q99626	Homeobox protein CDX-2	CDX2	182494	181728	175414	220307	218990	233208	214836	241907	250301
Q99623	Prohibitin-2	PHB2	9373243	8221330	7.84366e+06	7047474	7455741	7249962	8857720	7245602	7629871
Q99622	Protein C10	C12orf57	264838	277174	339777	347048	369603	373593	338491	358007	323388
Q99618	Cell division cycle-associated protein 3	CDCA3	97128.5	101608	162795	163176	152576	144134	109960	87619.1	129039
Q99615	DnaJ homolog subfamily C member 7	DNAJC7	1.66247e+06	1.59112e+06	1.87545e+06	1.7255e+06	1773978	1.71337e+06	1.30248e+06	1445184	1.34471e+06
Q99614	Tetratricopeptide repeat protein 1	TTC1	1.15611e+06	1.18241e+06	1.30507e+06	1.22649e+06	1.17016e+06	1.24139e+06	1.07899e+06	1.13808e+06	1.06169e+06
Q99613	Eukaryotic translation initiation factor 3 subunit C	EIF3C	5.15544e+06	5212426	4363534	5009217	4.52342e+06	4.33317e+06	4766785	4769311	4934781
Q99598	Translin-associated protein X	TSNAX	770954	773265	914605	806199	872419	831882	873991	883234	845256
Q99595	Mitochondrial import inner membrane translocase subunit Tim17-A	TIMM17A	103411	108332	63717.9	113796	94808.8	97767.1	136510	92908.6	107994
Q99590	Protein SCAF11	SCAF11	250388	221919	265676	246592	263170	270177	223164	232740	241309
Q99584	Protein S100-A13	S100A13	841316	887019	949224	824578	859334	850570	777713	872510	845457
Q99583	Max-binding protein MNT	MNT	82919	81888.9	109709	88830.9	90604.4	101981	88368.3	100173	95974.5
Q99575	Ribonucleases P/MRP protein subunit POP1	POP1	914969	938197	959728	786015	773208	771745	791334	800977	818269
Q99571	P2X purinoceptor 4	P2RX4	187685	192732	209790	248203	253102	243297	220808	242031	227238
Q99570	Phosphoinositide 3-kinase regulatory subunit 4	PIK3R4	216264	198814	273726	249038	248537	249023	213246	239340	221170
Q99569	Plakophilin-4	PKP4	45774.5	54343.9	54378.6	50814.7	65977.6	55986.9	66779.6	63579.8	69205.5
Q99567	Nuclear pore complex protein Nup88	NUP88	289349	318380	406459	329983	380434	343270	283890	309927	308046
Q99549	M-phase phosphoprotein 8	MPHOSPH8	58156.1	52862.9	64654.9	52093.9	63709.5	68514.7	51922.6	52138.6	51290.6
Q99547	M-phase phosphoprotein 6	MPHOSPH6	246972	257918	262722	240385	265780	242560	233722	229959	237133
Q99543	DnaJ homolog subfamily C member 2	DNAJC2	865501	771471	946526	770250	771548	758915	628448	667613	655333
Q99538	Legumain	LGMN	65420.9	76056.5	98319.1	100877	95398.3	76309.1	85084.2	89069.2	86693.4
Q99536	Synaptic vesicle membrane protein VAT-1 homolog	VAT1	651895	670717	763562	842441	869826	882347	871952	893902	853211
Q99523	Sortilin	SORT1	18757.9	15064	18023.5	22870.8	21358.9	19851.4	27348	33026.4	34503.1
Q99519	Sialidase-1	NEU1	184832	174900	206413	215329	230112	197027	211043	242117	252241
Q99504	Eyes absent homolog 3	EYA3	121760	91108.7	156358	113235	136232	121363	86417.5	96764.4	113258
Q99497	Parkinson disease protein 7	PARK7	6843515	7331656	8689048	7.26066e+06	7.38174e+06	7495160	6.77946e+06	7436279	6.77716e+06
Q99496	E3 ubiquitin-protein ligase RING2	RNF2	198844	213951	168823	220991	168887	195233	201448	174897	190945
Q99487	Platelet-activating factor acetylhydrolase 2, cytoplasmic	PAFAH2	36401.8	31716.9	42374.8	76514.5	53908	52430.1	52492.3	46806.6	55992.4
Q99471	Prefoldin subunit 5	PFDN5	1621624	1.70203e+06	1947384	1.65867e+06	1.68759e+06	1.59168e+06	1.73406e+06	1.79715e+06	1.68125e+06
Q99470	Stromal cell-derived factor 2	SDF2	56543.7	57040.5	62572.6	55722.6	56629.2	62907.3	60324	62551.1	62019.7
Q99460	26S proteasome non-ATPase regulatory subunit 1	PSMD1	2888024	2.82381e+06	3.23882e+06	2884909	3.10781e+06	3.09662e+06	2833203	3008379	2.79432e+06
Q99459	Cell division cycle 5-like protein	CDC5L	869120	907761	995238	902893	983483	972461	1.02491e+06	885195	944110
Q99447	Ethanolamine-phosphate cytidylyltransferase	PCYT2	361562	376601	357366	342952	351121	375023	387822	378931	353247
Q99442	Translocation protein SEC62	SEC62	417055	414472	437690	487505	404993	448824	381933	372079	372227
Q99439	Calponin-2	CNN2	1.76598e+06	1.74838e+06	2.03373e+06	2102782	2.17103e+06	2195908	1.82614e+06	1.94416e+06	1.89469e+06
Q99436	Proteasome subunit beta type-7	PSMB7	2.53928e+06	2.44349e+06	2.72664e+06	2427099	2.66435e+06	2.70204e+06	2.45476e+06	2.61982e+06	2508795
Q99426	Tubulin-folding cofactor B	TBCB	1.34089e+06	1330232	1.42819e+06	1.76537e+06	1.76175e+06	1691197	1.21361e+06	1.20989e+06	1.17657e+06
Q99417	c-Myc-binding protein	MYCBP	644218	641260	646842	590578	676342	688437	633628	641502	624429
Q96TC7	Regulator of microtubule dynamics protein 3	RMDN3	770444	738389	781978	950165	914331	856656	852760	891087	872950
Q96TA2	ATP-dependent zinc metalloprotease YME1L1	YME1L1	495384	530136	569640	570167	571392	536968	449954	474117	459065
Q96TA1	Protein Niban 2	NIBAN2	1.21473e+06	1.21581e+06	1.27277e+06	1176284	1.21583e+06	1.19682e+06	1.10972e+06	1.05396e+06	1.03037e+06
Q96T88	E3 ubiquitin-protein ligase UHRF1	UHRF1	213248	220389	255831	250467	261517	261799	199347	208966	198941
Q96T76	MMS19 nucleotide excision repair protein homolog	MMS19	810884	814707	784472	806842	811366	776158	817419	857315	820154
Q96T60	Bifunctional polynucleotide phosphatase/kinase	PNKP	305604	290527	337082	308687	335238	327288	340899	325977	320823
Q96T58	Msx2-interacting protein	SPEN	111813	105423	103390	101499	99600.5	99524.7	100872	107886	103832
Q96T51	RUN and FYVE domain-containing protein 1	RUFY1	213440	232306	192808	222690	213308	208592	185686	197694	188657
Q96T37	RNA-binding protein 15	RBM15	522776	492800	595572	520161	586784	581115	511091	522651	503951
Q96T23	Remodeling and spacing factor 1	RSF1	220287	218646	240656	257891	252792	244345	221462	238712	218075
Q96SZ6	Mitochondrial tRNA methylthiotransferase CDK5RAP1	CDK5RAP1	117213	126306	110828	117302	129444	116730	117893	129729	114954
Q96SZ5	2-aminoethanethiol dioxygenase	ADO	104812	94195.3	123555	93806.9	121044	118563	117261	105965	100020
Q96SY0	Integrator complex subunit 14	INTS14	185462	197433	127459	199930	149683	155984	193673	196990	204486
Q96SW2	Protein cereblon	CRBN	81638.5	88186	78026	113461	113026	104870	100106	105719	105348
Q96SU4	Oxysterol-binding protein-related protein 9	OSBPL9	583322	606389	541563	596381	580379	556104	590430	633886	647643
Q96ST3	Paired amphipathic helix protein Sin3a	SIN3A	303986	299513	363459	359668	384982	370986	342545	334553	330383
Q96ST2	Protein IWS1 homolog	IWS1	651446	649944	707361	771050	779856	719172	589287	599280	603555
Q96SQ9	Cytochrome P450 2S1	CYP2S1	88652.5	84326.3	70120.1	125188	102659	110451	120721	106562	114290
Q96SK2	Transmembrane protein 209	TMEM209	170270	166396	190334	185775	189053	189291	164554	183495	170703
Q96SI9	Spermatid perinuclear RNA-binding protein	STRBP	1.32403e+06	1.34904e+06	1.3854e+06	1.42531e+06	1.34577e+06	1.36585e+06	1.19067e+06	1.17114e+06	1.16264e+06
Q96SB8	Structural maintenance of chromosomes protein 6	SMC6	81866.1	88993.2	71649.1	101132	92417.2	97510.9	86327.4	84309.2	101359
Q96SB4	SRSF protein kinase 1	SRPK1	697151	725349	841144	690374	688114	701385	691242	713489	705124
Q96SB3	Neurabin-2	PPP1R9B	140456	132516	148042	126691	132456	158148	150611	170731	157972
Q96S97	Myeloid-associated differentiation marker	MYADM	437582	434902	440248	525210	495434	501643	390141	397349	370135
Q96S82	Ubiquitin-like protein 7	UBL7	71169.8	70542.9	78331.8	72534.7	82718.8	70425.7	53394.5	58382.3	65970.4
Q96S66	Chloride channel CLIC-like protein 1	CLCC1	320941	325028	408965	357154	401886	383096	333954	377670	342280
Q96S59	Ran-binding protein 9	RANBP9	295108	287326	317479	301939	305708	292740	248435	261144	231921
Q96S55	ATPase WRNIP1	WRNIP1	60904.8	74004.7	93167.2	125448	92046	71091	75388.1	79248.3	75586.3
Q96S52	GPI transamidase component PIG-S	PIGS	198475	180611	217804	182958	222718	210690	248994	235835	249119
Q96S44	EKC/KEOPS complex subunit TP53RK	TP53RK	202669	200592	188583	239022	231938	214633	212195	207887	200475
Q96S19	Methyltransferase-like 26	METTL26	360186	358388	337451	383728	390485	369458	390919	392740	387346
Q96RU2	Ubiquitin carboxyl-terminal hydrolase 28	USP28	51561.5	48815.4	44176.5	58686	55483.9	52314.9	55028.7	58068.6	57377.2
Q96RT7	Gamma-tubulin complex component 6	TUBGCP6	41011.7	36485.5	46513.7	45722.8	53207.5	48737.8	38743.6	36415	33023.6
Q96RT1	Erbin	ERBIN	210814	229658	268724	233936	265502	235624	204249	244039	197080
Q96RS6	NudC domain-containing protein 1	NUDCD1	1.04942e+06	1.10358e+06	2.35711e+06	1.10114e+06	1100477	1.0861e+06	1.05566e+06	1.07791e+06	1.07342e+06
Q96RS0	Trimethylguanosine synthase	TGS1	92048.1	90243.8	64463.1	106240	78552.5	81422.7	92140.4	79571.4	85228
Q96RQ3	Methylcrotonoyl-CoA carboxylase subunit alpha, mitochondrial	MCCC1	73414.9	80894.7	88015.6	97235.2	116622	89772.5	106887	79937.2	67130.1
Q96RQ1	Endoplasmic reticulum-Golgi intermediate compartment protein 2	ERGIC2	117462	110994	82600.2	108864	102326	101178	121268	95846.5	108173
Q96RP9	Elongation factor G, mitochondrial	GFM1	1.33799e+06	1.32193e+06	1.59715e+06	1291279	1.32624e+06	1.29636e+06	1187628	1.20683e+06	1.18439e+06
Q96RP7	Galactose-3-O-sulfotransferase 4	GAL3ST4	184793	109839	607166	139174	122476	76711.9	200489	177020	236550
Q96RN5	Mediator of RNA polymerase II transcription subunit 15	MED15	396410	358374	469977	349644	425552	408916	420085	408837	393106
Q96RL7	Vacuolar protein sorting-associated protein 13A	VPS13A	204739	207590	151123	238224	213836	193149	228323	229968	247528
Q96RL1	BRCA1-A complex subunit RAP80	UIMC1	38314.6	36392.8	36761.3	44711.8	36906.9	37539.4	26348.7	31741.3	32723.1
Q96RE7	Nucleus accumbens-associated protein 1	NACC1	173480	163963	155496	187579	192597	195872	189204	189366	168118
Q96RD7	Pannexin-1	PANX1	77385.4	117768	97058.4	119672	119078	126591	89622	108288	115301
Q96R06	Sperm-associated antigen 5	SPAG5	110328	114801	127907	116873	119414	124929	160037	104300	104701
Q96QU8	Exportin-6	XPO6	88252.4	86497.4	59337.4	70128.7	73429.9	71851	76065.2	65073.1	71327.9
Q96QR8	Transcriptional activator protein Pur-beta	PURB	298960	309975	291402	292999	307496	295272	345393	339686	357387
Q96QK1	Vacuolar protein sorting-associated protein 35	VPS35	2.03098e+06	2103758	2.49293e+06	2113614	2.38423e+06	2.2972e+06	2.1802e+06	2.23165e+06	2.23588e+06
Q96QG7	Myotubularin-related protein 9	MTMR9	94059.3	97424.8	91714.8	80183.3	79431	81484.4	101486	114632	106525
Q96QF0	Rab-3A-interacting protein	RAB3IP	44024.3	55367.8	84982.4	65187.3	70138.7	73386.3	55293.3	59380.9	50242.1
Q96QE5	Transcription elongation factor, mitochondrial	TEFM	90425.5	92451	71403.3	74011.4	67631.4	73936.7	101202	87211.1	87396.8
Q96QE3	ATPase family AAA domain-containing protein 5	ATAD5	35582.5	39797.5	28930.1	41128.5	33865.2	36831.8	37618.2	38504.1	38187.3
Q96QD9	UAP56-interacting factor	FYTTD1	117558	113728	140139	162153	160836	169067	136869	138875	142047
Q96QD8	Sodium-coupled neutral amino acid transporter 2	SLC38A2	361071	352244	378710	345358	339012	348491	277611	333792	294108
Q96QC0	Serine/threonine-protein phosphatase 1 regulatory subunit 10	PPP1R10	338102	334995	372040	365257	377107	388704	287408	318992	308498
Q96QA5	Gasdermin-A	GSDMA	226623	233200	247204	195967	189515	165856	314035	307109	323601
Q96Q15	Serine/threonine-protein kinase SMG1	SMG1	146175	159145	120907	140010	128984	142852	153631	168701	160988
Q96Q11	CCA tRNA nucleotidyltransferase 1, mitochondrial	TRNT1	603843	560033	502199	467556	542513	502777	665373	571362	598554
Q96Q07	BTB/POZ domain-containing protein 9	BTBD9	4936.4	4398.36	6312.28	4280.67	4923.39	4128.54	4685.36	4645.55	2324.69
Q96PZ2	Protein FAM111A	FAM111A	78758.5	74887	102660	113158	96794.2	106180	101387	105951	58618.7
Q96PZ0	Pseudouridylate synthase 7 homolog	PUS7	601796	626076	740422	635826	646299	604621	518959	533605	536917
Q96PY5	Formin-like protein 2	FMNL2	29925.6	32365.7	23890.9	34281.1	30507.4	31021.5	40847.8	37924.2	39035.9
Q96PV6	Leukocyte receptor cluster member 8	LENG8	131582	112011	157517	145338	151784	126292	104944	134115	110076
Q96PU8	Protein quaking	QKI	34837.3	44128.2	61174.2	62363.8	66807.8	51392.3	17108.6	35773.6	56323.7
Q96PU5	E3 ubiquitin-protein ligase NEDD4-like	NEDD4L	292426	334689	318909	351381	352819	335574	337664	330485	355867
Q96PM5	RING finger and CHY zinc finger domain-containing protein 1	RCHY1	18032.2	24038.1	29589.7	26722.8	32878.8	28501.3	19896.2	20520.9	17619.4
Q96PK6	RNA-binding protein 14	RBM14	2.87724e+06	2.9716e+06	3.61961e+06	3.112e+06	3323886	3233253	2.56072e+06	2.75183e+06	2.59881e+06
Q96PE7	Methylmalonyl-CoA epimerase, mitochondrial	MCEE	65667.9	69521.6	78230.8	81774.3	87805.3	74617.1	72641.9	70145.3	75067.1
Q96PE3	Inositol polyphosphate-4-phosphatase type I A	INPP4A	98921	97716.4	83317.9	126678	119226	114418	115148	110624	105570
Q96PC5	Melanoma inhibitory activity protein 2	MIA2	157024	156712	148411	252343	231744	225784	187908	194287	187312
Q96P70	Importin-9	IPO9	2.34162e+06	2.39467e+06	2525863	2.06406e+06	2.2561e+06	2.27629e+06	2.11148e+06	2.51948e+06	2.3091e+06
Q96P48	Arf-GAP with Rho-GAP domain, ANK repeat and PH domain-containing protein 1	ARAP1	554136	563609	468141	596472	540399	556740	677649	662969	664379
Q96P47	Arf-GAP with GTPase, ANK repeat and PH domain-containing protein 3	AGAP3	39801.2	43263.8	60692.1	60358.1	53981.3	71668.4	58268.2	61108.1	54962.5
Q96P16	Regulation of nuclear pre-mRNA domain-containing protein 1A	RPRD1A	313299	323334	335190	350529	318613	301617	332882	312751	310856
Q96P11	28S rRNA (cytosine-C(5))-methyltransferase	NSUN5	169166	165413	201607	178416	185496	180844	140878	150942	135061
Q96NY7;Q9NZA1	Chloride intracellular channel protein 6;Chloride intracellular channel protein 5	CLIC6	66340.9	72299.5	70916.6	79962.9	81151.9	106160	57659.9	70479.9	53711
Q96NW4	Ankyrin repeat domain-containing protein 27	ANKRD27	20231.8	19712.4	18537.9	21466.9	19602.3	22953.9	20302.5	20125.4	21778.2
Q96NT0	Coiled-coil domain-containing protein 115	CCDC115	113606	125710	104005	126558	139098	141796	96422.2	111123	85715.6
Q96ND0	Protein FAM210A	FAM210A	90800.2	86053	72586	79248.7	70859.6	77518.6	67382.6	77361.6	90497.1
Q96NC0	Zinc finger matrin-type protein 2	ZMAT2	62299.7	61651.1	61047.8	70586.3	67483.8	64842.2	47440	48165.2	46134.2
Q96NB2	Sideroflexin-2	SFXN2	124615	110807	117211	118925	118140	108956	116137	125242	133100
Q96NA2	Rab-interacting lysosomal protein	RILP	37065.4	37170.1	32481.4	52069.2	56005.3	43269	24664.7	26718.6	28446.1
Q96N67	Dedicator of cytokinesis protein 7	DOCK7	220295	217420	202230	225118	237637	222273	246350	244972	248424
Q96N66	Lysophospholipid acyltransferase 7	MBOAT7	1.20466e+06	1.16438e+06	1.22096e+06	1.60111e+06	1.41941e+06	1.55368e+06	1227730	1248777	1.25997e+06
Q96MX6	WD repeat-containing protein 92	DNAAF10	357904	366483	404824	420403	422469	454148	366081	397161	364699
Q96MX3	Zinc finger protein 48	ZNF48	6892.28	9844.71	15997.1	20120	19398.9	13228.4	1.0755	11305.9	6366.92
Q96MW5	Conserved oligomeric Golgi complex subunit 8	COG8	180130	184499	197319	204232	210779	219659	195372	208881	218352
Q96MW1	Coiled-coil domain-containing protein 43	CCDC43	262352	275657	289017	309412	324677	321628	298324	321554	297314
Q96MU7	YTH domain-containing protein 1	YTHDC1	557261	608761	582722	571818	574410	650141	568958	530767	546799
Q96MT8	Centrosomal protein of 63 kDa	CEP63	51112.8	56137	55407.2	52745.3	62239.7	61822.3	57872.1	64899.7	60584.1
Q96MH6	Transmembrane protein 68	TMEM68	55460.5	45794	27530.2	62063.8	44722.2	43432.8	62679.4	53592.1	53853.4
Q96MG7	Non-structural maintenance of chromosomes element 3 homolog	NSMCE3	111423	111595	107902	146623	147604	135842	98574.8	97497.9	96752.5
Q96MF7	E3 SUMO-protein ligase NSE2	NSMCE2	56340.2	55328.2	57957.4	62106.9	65739.4	65555.5	53893.7	55721.3	54296.2
Q96ME1	F-box/LRR-repeat protein 18	FBXL18	256595	260152	278339	313652	292108	274507	271505	280537	279652
Q96M96	FYVE, RhoGEF and PH domain-containing protein 4	FGD4	76066.6	77688.1	72730.1	76683	84230.5	80658.1	69428.2	74580	70351.2
Q96M27	Protein PRRC1	PRRC1	839644	799497	601601	821192	754256	801500	869024	796233	890909
Q96LR5	Ubiquitin-conjugating enzyme E2 E2	UBE2E2	1.98048e+06	1837041	1.67964e+06	1.91264e+06	2.09732e+06	2101118	1.74359e+06	2.04673e+06	2.03892e+06
Q96LL9	DnaJ homolog subfamily C member 30, mitochondrial	DNAJC30	36136.4	31549.2	42714.3	29683	27392.8	36502	37065	37705.6	29211.1
Q96LJ7	Dehydrogenase/reductase SDR family member 1	DHRS1	82420.5	86014.1	91564.7	122965	128416	131805	123185	126536	119990
Q96LI5	CCR4-NOT transcription complex subunit 6-like	CNOT6L	119746	124769	95642.4	127624	111065	107153	109553	101371	100870
Q96LD8	Sentrin-specific protease 8	SENP8	69725	51015.2	36407	47661.1	41314	53452.1	62922.9	66321.1	65720.6
Q96LA8	Protein arginine N-methyltransferase 6	PRMT6	37007.5	33078.7	36219	39841.5	49306.3	42922.7	50282	41092.6	45636.6
Q96L92	Sorting nexin-27	SNX27	342051	337059	350255	365247	352470	371972	341624	350863	340476
Q96L91	E1A-binding protein p400	EP400	148936	171547	174563	164539	193243	122749	164131	183505	180841
Q96L50	Leucine-rich repeat protein 1	LRR1	46572.6	46803.8	47402.9	89764.3	80186.5	71596.8	61304.4	66735.5	65706.3
Q96KR1	Zinc finger RNA-binding protein	ZFR	925921	918142	1.04211e+06	973701	1.03572e+06	1.1395e+06	753882	813488	828820
Q96KQ7	Histone-lysine N-methyltransferase EHMT2	EHMT2	118497	126298	141810	143737	152035	149697	101165	124635	133848
Q96KP4	Cytosolic non-specific dipeptidase	CNDP2	4137372	4.30914e+06	5.01989e+06	4360863	4618269	4623705	4.3761e+06	4.69478e+06	4553543
Q96KP1	Exocyst complex component 2	EXOC2	160266	163139	144554	149594	173231	165100	183452	201171	194273
Q96KG9	N-terminal kinase-like protein	SCYL1	835778	780796	847535	782360	810413	750517	754031	778898	731218
Q96KC8	DnaJ homolog subfamily C member 1	DNAJC1	87415.7	82603	95704.7	101356	119099	112734	73008.7	81850.8	72784.8
Q96KC2;Q9Y689	ADP-ribosylation factor-like protein 5B;ADP-ribosylation factor-like protein 5A	ARL5B	139789	124608	98373.6	136552	109628	114067	159127	94886.1	133983
Q96KB5	Lymphokine-activated killer T-cell-originated protein kinase	PBK	1.69576e+06	1.55605e+06	1.84647e+06	1713433	1.70149e+06	1.61736e+06	1.54279e+06	1.50857e+06	1512778
Q96KA5	Cleft lip and palate transmembrane protein 1-like protein	CLPTM1L	268329	282085	318292	246431	309483	292378	258966	280586	281927
Q96K76	Ubiquitin carboxyl-terminal hydrolase 47	USP47	830508	874328	982108	853449	918129	876746	886137	938348	902642
Q96K58	Zinc finger protein 668	ZNF668	142737	142820	152070	141247	132390	149063	94810.1	103195	111854
Q96K49	Transmembrane protein 87B	TMEM87B	8872.73	18118.2	6325.35	26294.2	14833.4	10722.2	12618.4	19256.8	20920.5
Q96K37	Solute carrier family 35 member E1	SLC35E1	104402	103639	96034.1	101356	111963	115622	89714	89462.4	96766.5
Q96K21	Abscission/NoCut checkpoint regulator	ZFYVE19	68863.1	96363.4	98880.8	122236	128752	109167	99484.6	89628.6	94679.4
Q96K19	E3 ubiquitin-protein ligase RNF170	RNF170	126028	128334	114625	149307	155301	152150	158850	144066	143912
Q96K17	Transcription factor BTF3 homolog 4	BTF3L4	875840	912411	1.0378e+06	977174	1.09397e+06	1.00874e+06	841886	841788	837429
Q96JY6	PDZ and LIM domain protein 2	PDLIM2	55200.2	45136.9	63856	48685.7	50575.8	55031	49694.4	63443.5	59574.6
Q96JP5	E3 ubiquitin-protein ligase ZFP91	ZFP91	114177	105624	116476	83131.1	115648	114273	94189.4	96677.8	107092
Q96JP0	Protein fem-1 homolog C	FEM1C	16614.6	12318.6	3617.53	9461.21	8569.15	8076.21	19114.2	15411.9	19218.4
Q96JM7	Lethal(3)malignant brain tumor-like protein 3	L3MBTL3	87405.7	82152.8	75227.7	126193	121865	102765	92003.4	126964	116068
Q96JM3	Chromosome alignment-maintaining phosphoprotein 1	CHAMP1	274813	275463	296189	296609	303111	292716	280189	308867	294028
Q96JJ7	Protein disulfide-isomerase TMX3	TMX3	629582	605066	659748	608591	690466	641132	633734	643482	689058
Q96JJ3	Engulfment and cell motility protein 2	ELMO2	165324	182312	204602	193164	194021	195705	195600	227098	211711
Q96JH7	Deubiquitinating protein VCIP135	VCPIP1	242530	264098	290903	286725	287239	260798	258273	294110	281247
Q96JG6	Syndetin	VPS50	244315	227756	204067	231550	234896	253368	277321	260196	248286
Q96JC1	Vam6/Vps39-like protein	VPS39	22484.5	12595.9	6536.67	7565.34	8896.9	15200.9	22243.7	21356.1	25212.4
Q96JB5	CDK5 regulatory subunit-associated protein 3	CDK5RAP3	648310	582000	594214	703696	668450	672998	694652	654194	691836
Q96JB2	Conserved oligomeric Golgi complex subunit 3	COG3	105536	100613	115997	118936	104827	109377	84825.2	135254	110710
Q96J42	Thioredoxin domain-containing protein 15	TXNDC15	76532	76602.2	104216	95570.5	73044.9	90856.2	91619.1	104449	109469
Q96J02	E3 ubiquitin-protein ligase Itchy homolog	ITCH	259621	259310	155936	221653	160212	157841	197360	156030	224115
Q96J01	THO complex subunit 3	THOC3	915017	924423	1.07323e+06	894262	945887	889441	1.03119e+06	1.07254e+06	1.07039e+06
Q96IZ7	Serine/Arginine-related protein 53	RSRC1	225490	231768	258478	247332	256666	232913	196692	187991	187101
Q96IZ0	PRKC apoptosis WT1 regulator protein	PAWR	371129	342086	395112	397648	409724	444641	336432	368058	361497
Q96IY1	Kinetochore-associated protein NSL1 homolog	NSL1	123401	128474	118519	113493	130165	152778	153218	155720	159328
Q96IX5	ATP synthase membrane subunit DAPIT, mitochondrial	ATP5MK	2.28882e+06	2.12428e+06	2.67689e+06	3004262	2.84749e+06	2.85195e+06	2.52644e+06	2716062	2.53322e+06
Q96IW7	Vesicle-trafficking protein SEC22a	SEC22A	123402	133213	137633	128101	128212	130316	125531	137995	136472
Q96IV0	Peptide-N(4)-(N-acetyl-beta-glucosaminyl)asparagine amidase	NGLY1	127840	122793	111591	116579	125749	116632	130928	129460	134311
Q96IU4	Protein ABHD14B	ABHD14B	283396	287676	282099	359496	334118	350499	377204	405784	385408
Q96IJ6	Mannose-1-phosphate guanyltransferase alpha	GMPPA	545987	546734	443640	569651	474650	520066	584684	572786	589252
Q96IF1	LIM domain-containing protein ajuba	AJUBA	229228	283948	292618	286361	278447	239200	211424	254997	234621
Q96I99	Succinate--CoA ligase [GDP-forming] subunit beta, mitochondrial	SUCLG2	409002	419795	455804	479680	506372	485276	478308	497186	489250
Q96I59	Probable asparagine--tRNA ligase, mitochondrial	NARS2	267880	232259	256027	472755	269912	408664	316393	298435	327764
Q96I25	Splicing factor 45	RBM17	984115	993620	1.23731e+06	1.00381e+06	1.04947e+06	973021	876262	957570	899219
Q96I24	Far upstream element-binding protein 3	FUBP3	1.64372e+06	1.63106e+06	1.93924e+06	1.67469e+06	1.79924e+06	1.62448e+06	1.56746e+06	1.63457e+06	1.51439e+06
Q96I15	Selenocysteine lyase	SCLY	76188	68400.2	80324.2	114497	92917.6	77774.5	82724.9	64889.4	78475
Q96HY6	DDRGK domain-containing protein 1	DDRGK1	637405	649293	591281	651723	676201	653114	644125	619211	652050
Q96HW7	Integrator complex subunit 4	INTS4	92843.7	94532.4	116470	136922	127380	127559	102546	97668.7	80164.2
Q96HV5	Transmembrane protein 41A	TMEM41A	209511	199420	60204.4	104577	54530.6	88780.9	226552	144705	187086
Q96HU8	GTP-binding protein Di-Ras2	DIRAS2	3784.97	8701.64	20009	22114.3	103947	82214	234776	354456	328699
Q96HS1	Serine/threonine-protein phosphatase PGAM5, mitochondrial	PGAM5	1.35115e+06	1.35081e+06	1.66503e+06	1.2548e+06	1.4531e+06	1.40359e+06	1.23897e+06	1.34384e+06	1.34679e+06
Q96HR9	Receptor expression-enhancing protein 6	REEP6	401070	395077	377298	388458	433812	443116	351600	339580	374365
Q96HR8	H/ACA ribonucleoprotein complex non-core subunit NAF1	NAF1	85544.1	87430.2	128804	103109	102771	99686.5	76591.3	64715.4	60902.9
Q96HQ2	CDKN2AIP N-terminal-like protein	CDKN2AIPNL	261510	269305	288426	212808	230010	255353	196826	183362	194396
Q96HP4	Oxidoreductase NAD-binding domain-containing protein 1	OXNAD1	75048.8	82907.3	56797.4	69545.7	61507.2	66421	76938.7	70932.4	82229.1
Q96HP0	Dedicator of cytokinesis protein 6	DOCK6	157513	155994	163167	187926	174759	179333	167181	177617	176326
Q96HN2	Adenosylhomocysteinase 3	AHCYL2	81133.9	85419.7	85280.4	109790	99478.3	105185	103916	102783	98124.8
Q96HJ9	Protein FMC1 homolog	FMC1	327634	315898	430524	371468	455380	412957	392048	410344	406865
Q96HE7	ERO1-like protein alpha	ERO1A	3452317	3.31763e+06	3.85653e+06	3575603	3789960	3.60095e+06	3.24563e+06	3.1151e+06	2.99585e+06
Q96HD1	Protein disulfide isomerase CRELD1	CRELD1	67095.7	73748.4	82840.6	83067.8	86366.8	83050.7	82284.9	74455.2	69852.3
Q96HC4	PDZ and LIM domain protein 5	PDLIM5	1.08711e+06	1.16096e+06	1.34688e+06	1.27024e+06	1.41843e+06	1.37409e+06	929967	1.09398e+06	949364
Q96HB5	Coiled-coil domain-containing protein 120	CCDC120	411167	415270	346242	435994	455188	428959	433074	369697	428600
Q96HA9	Peroxisomal membrane protein 11C	PEX11G	22613.2	23531.3	20548.9	21159.1	27938.5	29807.1	38801.7	41721.8	43062.6
Q96HA7	Tonsoku-like protein	TONSL	99801.5	89552.8	107802	120549	111195	101682	93024	110293	90426.2
Q96H79	Zinc finger CCCH-type antiviral protein 1-like	ZC3HAV1L	173375	159569	168415	174557	169507	178064	153419	158730	146980
Q96H55	Unconventional myosin-XIX	MYO19	77388.1	83678.2	85461.2	82261.3	75459.6	77905.2	65071.8	73158.7	67833.7
Q96H20	Vacuolar-sorting protein SNF8	SNF8	217785	204708	259089	242216	270708	272532	206175	257457	240327
Q96GY0	Zinc finger C2HC domain-containing protein 1A	ZC2HC1A	56814	66943	77262.5	76973.9	73605	78909	67425.1	71458.8	63195.8
Q96GX9	Methylthioribulose-1-phosphate dehydratase	APIP	432096	435926	502514	493352	435713	400874	422131	446022	433686
Q96GX5	Serine/threonine-protein kinase greatwall	MASTL	152766	155170	135394	137516	137254	137346	158426	146287	156810
Q96GW9	Methionine--tRNA ligase, mitochondrial	MARS2	237438	232408	253854	175124	215113	193012	207427	201660	215380
Q96GS4	BLOC-1-related complex subunit 6	BORCS6	26609.1	24427.1	27913.4	37376.2	24494	36767.7	32066.9	34996.6	32394.9
Q96GQ7	Probable ATP-dependent RNA helicase DDX27	DDX27	1.30288e+06	1.28355e+06	1.50817e+06	1.33605e+06	1.40522e+06	1.22547e+06	1.13082e+06	1.15182e+06	1.13202e+06
Q96GN5	Cell division cycle-associated 7-like protein	CDCA7L	58177.9	54422.5	88505.8	98999.7	91545.1	83023.8	70628.2	90775.7	83231.2
Q96GM8	Target of EGR1 protein 1	TOE1	547569	542350	748416	531574	605957	568039	471096	533593	518565
Q96GM5	SWI/SNF-related matrix-associated actin-dependent regulator of chromatin subfamily D member 1	SMARCD1	139800	146207	155288	153911	155661	161774	94623.9	106989	116281
Q96GK7	Fumarylacetoacetate hydrolase domain-containing protein 2A	FAHD2A	514140	495478	584582	554117	557372	535459	594489	653191	616957
Q96GI7	Protein FAM89A	FAM89A	20747.5	18138.8	10160.6	18220.1	12351.4	11958.8	21976.3	18533.7	16857.9
Q96GG9	DCN1-like protein 1	DCUN1D1	617389	610326	552723	583237	585942	560473	623737	645415	595649
Q96GF1	E3 ubiquitin-protein ligase RNF185	RNF185	879180	795982	757005	528032	730156	683078	817782	797791	785737
Q96GD4	Aurora kinase B	AURKB	138731	140504	158286	215305	202920	196978	217537	198335	225534
Q96GC9	Vacuole membrane protein 1	VMP1	375913	406333	253919	394410	259315	297167	459421	357228	369798
Q96GC5	39S ribosomal protein L48, mitochondrial	MRPL48	197873	214956	180363	181546	184357	167389	222899	206160	202562
Q96GA7	Serine dehydratase-like	SDSL	133338	121437	130809	197151	212099	199005	240714	251159	257000
Q96GA3	Protein LTV1 homolog	LTV1	180060	187722	224844	177080	198690	181064	147963	164918	160472
Q96G97	Seipin	BSCL2	163831	158673	179309	189003	194728	168281	218401	272760	252510
Q96G46	tRNA-dihydrouridine(47) synthase [NAD(P)(+)]-like	DUS3L	183299	198776	229436	175994	202746	183635	184200	164809	187090
Q96G28	Cilia- and flagella-associated protein 36	CFAP36	67315	64146.9	62592.2	60078.4	82124.2	66502	68029.6	81028.2	73013.3
Q96G25	Mediator of RNA polymerase II transcription subunit 8	MED8	72282.6	68736.2	90745.1	100693	85236	95063.7	61867.9	76222.8	53683.2
Q96G23	Ceramide synthase 2	CERS2	407537	373801	347699	358589	333303	395751	332476	327886	356303
Q96G21	U3 small nucleolar ribonucleoprotein protein IMP4	IMP4	899891	858488	1.01896e+06	806686	903934	917941	806355	845688	848574
Q96G04	Protein-lysine N-methyltransferase EEF2KMT	EEF2KMT	138427	143748	125550	99887.4	95878.3	98193.5	130605	121734	111915
Q96G03	Phosphoglucomutase-2	PGM2	2.13941e+06	2.12561e+06	2.42631e+06	2194319	2.33341e+06	2.32638e+06	2.07343e+06	2.10056e+06	2.0461e+06
Q96G01	Protein bicaudal D homolog 1	BICD1	48151.3	54753.5	62422.5	67845.5	70074.6	63334.4	48015.7	57564.8	47568.2
Q96FZ7	Charged multivesicular body protein 6	CHMP6	230098	219106	276405	236072	288606	282046	224283	241732	248713
Q96FZ2	Abasic site processing protein HMCES	HMCES	209495	214956	244997	228396	300378	274492	237300	218575	238871
Q96FX8	p53 apoptosis effector related to PMP-22	PERP	622138	640777	729886	881663	876352	1.10886e+06	707008	748754	687136
Q96FX7	tRNA (adenine(58)-N(1))-methyltransferase catalytic subunit TRMT61A	TRMT61A	784559	733759	793504	650864	633953	725410	637692	629693	610008
Q96FW1	Ubiquitin thioesterase OTUB1	OTUB1	1.45981e+06	1.53592e+06	1.62695e+06	1647533	1.65862e+06	1.69226e+06	1.45064e+06	1.42483e+06	1.3948e+06
Q96FV9	THO complex subunit 1	THOC1	491423	526053	607861	556850	552768	529898	443688	484163	444193
Q96FV2	Secernin-2	SCRN2	121571	119714	111458	120727	114980	109663	148347	154121	148455
Q96FQ6	Protein S100-A16	S100A16	1059816	1046633	1261551	977177	1.21183e+06	1.11296e+06	1.17024e+06	1279310	1.22766e+06
Q96FK6	WD repeat-containing protein 89	WDR89	73458.1	74445.9	64699.9	85640.5	84893.1	84838.2	72074.9	79129.9	87247.2
Q96FJ2	Dynein light chain 2, cytoplasmic	DYNLL2	912398	817515	1.03486e+06	752705	847064	863569	967939	1.25729e+06	1.21721e+06
Q96FJ0	AMSH-like protease	STAMBPL1	129541	129353	151170	101380	117103	128712	97214.8	109904	127336
Q96FF9	Sororin	CDCA5	84311.7	87665.7	87466.6	115105	126044	134410	88516.7	108039	104242
Q96FC9	ATP-dependent DNA helicase DDX11	DDX11	75392.7	94291.7	127676	102232	101294	82125.5	125248	84266.9	84195
Q96F86	Enhancer of mRNA-decapping protein 3	EDC3	434296	431341	429641	451259	465299	419472	414507	451132	424318
Q96F63	Coiled-coil domain-containing protein 97	CCDC97	244270	273404	303085	293578	294801	283742	236511	268028	280056
Q96F44	E3 ubiquitin-protein ligase TRIM11	TRIM11	57399	76755.8	61476.4	67966.9	68119.5	88144.3	68899.3	64509.2	65982.9
Q96F24	Nuclear receptor-binding factor 2	NRBF2	73747.5	68032.5	82502.3	68145.9	65495.3	72737.1	67551.9	77976.3	73056.8
Q96EY8	Corrinoid adenosyltransferase	MMAB	114492	118957	106932	128059	122864	102641	146529	112149	125768
Q96EY7	Pentatricopeptide repeat domain-containing protein 3, mitochondrial	PTCD3	1.4501e+06	506132	1.63715e+06	1.39158e+06	578839	1.41725e+06	535312	1.33703e+06	1.24206e+06
Q96EY5	Multivesicular body subunit 12A	MVB12A	251906	258829	303701	323065	323156	309495	277209	299715	296185
Q96EY4	Translation machinery-associated protein 16	TMA16	130031	131813	126694	121377	116061	115465	126891	117507	126291
Q96EY1	DnaJ homolog subfamily A member 3, mitochondrial	DNAJA3	1.09288e+06	1.10001e+06	1.21557e+06	1.24267e+06	1.31125e+06	1.19719e+06	1.09665e+06	1.09842e+06	1.06651e+06
Q96EX1	Small integral membrane protein 12	SMIM12	133227	130360	147315	131470	141718	135254	134197	134278	129235
Q96EV8	Dysbindin	DTNBP1	17793.4	15432.9	17631.9	17982.1	17545.8	19352.9	17162.4	20352.3	16755.2
Q96EV2	RNA-binding protein 33	RBM33	188965	227895	238978	236968	239147	240109	206469	216966	212699
Q96EU7	C1GALT1-specific chaperone 1	C1GALT1C1	94233.9	80351.7	118321	88834.8	75356.6	120814	104944	116942	108064
Q96EU6	Ribosomal RNA processing protein 36 homolog	RRP36	123941	126646	141698	161462	144400	125530	109938	118053	109928
Q96ES7	SAGA-associated factor 29	SGF29	47095.5	40543.9	41709.1	42471.2	50560.7	46887.8	36012.8	33971.4	37584.2
Q96ER9	Mitochondrial potassium channel	CCDC51	237882	184059	232279	214512	282686	229181	195320	273763	250085
Q96ER3	Protein SAAL1	SAAL1	306552	346293	257799	307624	268170	308604	285389	312587	343352
Q96EP5	DAZ-associated protein 1	DAZAP1	1.41414e+06	1.27521e+06	1213760	1.58831e+06	1.22736e+06	1.30238e+06	1.25132e+06	1.18767e+06	1.20765e+06
Q96EP0	E3 ubiquitin-protein ligase RNF31	RNF31	86576.1	66840.1	75673.9	94941.4	99412.1	85167.2	23184.6	100874	73178.2
Q96EN9	Required for excision 1-B domain-containing protein	REX1BD	61927.4	62712.5	14048.3	34722.9	35687.7	30752.9	45474.1	40688.8	61775.4
Q96EN8	Molybdenum cofactor sulfurase	MOCOS	92721.6	93805.3	118204	139872	120939	115200	109034	108141	92383.1
Q96EL3	39S ribosomal protein L53, mitochondrial	MRPL53	261371	236804	247517	241544	220029	234772	229460	224418	217817
Q96EL2	28S ribosomal protein S24, mitochondrial	MRPS24	357302	336271	528711	397400	361881	365864	395330	328089	350689
Q96EK9	Protein KTI12 homolog	KTI12	155150	151189	181722	212520	198177	176090	84420.7	142246	56925.6
Q96EK7	Constitutive coactivator of peroxisome proliferator-activated receptor gamma	FAM120B	104507	110444	101226	131397	117747	110992	121418	117568	116529
Q96EK6	Glucosamine 6-phosphate N-acetyltransferase	GNPNAT1	1.88428e+06	1.85883e+06	1.92726e+06	1.82608e+06	1.94956e+06	1.98032e+06	1.68114e+06	1.75364e+06	1746723
Q96EK5	KIF-binding protein	KIFBP	416393	407245	424823	470762	463707	468892	440758	473101	448404
Q96EK4	THAP domain-containing protein 11	THAP11	130431	137169	119223	174027	147300	155756	152056	155922	153846
Q96EI5	Transcription elongation factor A protein-like 4	TCEAL4	137692	31920.4	150917	203208	185887	192988	162681	183179	177018
Q96EH3	Mitochondrial assembly of ribosomal large subunit protein 1	MALSU1	82291.9	73661.8	98717.5	105816	101715	88097.7	60179.2	55679.1	47991.5
Q96EE3	Nucleoporin SEH1	SEH1L	605657	543822	567115	566571	567285	586522	553620	542222	532144
Q96ED9	Protein Hook homolog 2	HOOK2	83965.5	76526.3	87156.3	95877.3	100490	111216	92924.2	108929	91540.5
Q96EC8	Protein YIPF6	YIPF6	424420	464982	479126	526462	536158	511854	485981	492383	474610
Q96EB6	NAD-dependent protein deacetylase sirtuin-1	SIRT1	82749.8	190738	103529	69018.7	78833.9	80823.3	54783.1	70073.9	195439
Q96EB1	Elongator complex protein 4	ELP4	89239.7	95220	114605	82668.7	101853	107061	89631.7	103818	83823
Q96EA4	Protein Spindly	SPDL1	13576.6	48838.4	27295.4	28432.3	39674	42241.2	29800.1	37539.9	30563
Q96E39	RNA binding motif protein, X-linked-like-1	RBMXL1	61520.6	57054.4	67606.9	69139.4	63818.8	76714.6	62372.2	63782.8	75188.6
Q96E14	RecQ-mediated genome instability protein 2	RMI2	115528	133479	165950	106881	146745	143955	125289	156283	130871
Q96E11	Ribosome-recycling factor, mitochondrial	MRRF	317048	344708	355312	306162	320522	294495	300144	310255	296774
Q96DZ1	Endoplasmic reticulum lectin 1	ERLEC1	261624	279157	267712	324876	319701	312113	271378	283201	295194
Q96DV4	39S ribosomal protein L38, mitochondrial	MRPL38	770201	818084	952132	829437	877456	859420	736777	839784	745868
Q96DU7	Inositol-trisphosphate 3-kinase C	ITPKC	43546.2	43110.9	49757.4	51931.6	52644.1	58671.5	52655.5	42573.5	40351
Q96DR4	StAR-related lipid transfer protein 4	STARD4	165919	171507	205922	181943	187603	169499	256042	254105	235601
Q96DP5	Methionyl-tRNA formyltransferase, mitochondrial	MTFMT	35464.9	31293.8	33970.2	35250.7	34523.5	37051.9	33438.9	34491.4	36641.8
Q96DM3	Regulator of MON1-CCZ1 complex	RMC1	122464	124565	147362	163507	149593	148398	143312	145555	116150
Q96DI7	U5 small nuclear ribonucleoprotein 40 kDa protein	SNRNP40	1218214	1.22668e+06	1450382	1.14504e+06	1.22581e+06	1.27149e+06	1.19355e+06	1.19658e+06	1.1572e+06
Q96DH6	RNA-binding protein Musashi homolog 2	MSI2	480895	435375	413390	443224	399072	395425	412908	376189	407309
Q96DG6	Carboxymethylenebutenolidase homolog	CMBL	1.79512e+06	1.72338e+06	2.0199e+06	1.5602e+06	1.91675e+06	1.77162e+06	1.88752e+06	2.0575e+06	1.98702e+06
Q96DF8	Splicing factor ESS-2 homolog	ESS2	26519	10941.6	33234.4	29926.9	38330.1	14085.2	27773.4	23231.5	25160.7
Q96DE0	U8 snoRNA-decapping enzyme	NUDT16	414146	430893	455115	517739	521994	468952	367255	414605	388316
Q96DC9	Ubiquitin thioesterase OTUB2	OTUB2	92507.3	88681.7	119317	88633.7	91705.4	93125.8	95025.6	114181	117604
Q96DC7	Transmembrane and coiled-coil domain-containing protein 6	TMCO6	11740.8	11348.4	13114.4	9307.23	9470.67	11694	12191.3	11485.4	8880.3
Q96DB5	Regulator of microtubule dynamics protein 1	RMDN1	447568	469378	534838	578199	600635	556730	454002	463692	477004
Q96DA6	Mitochondrial import inner membrane translocase subunit TIM14	DNAJC19	436580	432503	445291	442238	482100	458530	475225	497733	501642
Q96D71	RalBP1-associated Eps domain-containing protein 1	REPS1	299911	317007	378505	404447	335604	322535	357020	356862	353502
Q96D70	R3H domain-containing protein 4	R3HDM4	36638.8	59691.9	44148.1	83641.9	80336.3	76487.9	76232.5	62934.9	70868.3
Q96D53	Atypical kinase COQ8B, mitochondrial	COQ8B	111378	117644	87329.9	119440	120811	106757	119734	115083	122087
Q96D46	60S ribosomal export protein NMD3	NMD3	611557	610742	633181	683194	642364	623653	608168	601494	591418
Q96CX6	Leucine-rich repeat-containing protein 58	LRRC58	646678	643686	688703	609077	643756	652581	622877	697044	628167
Q96CW5	Gamma-tubulin complex component 3	TUBGCP3	180736	158239	166440	177675	202440	178401	157892	159231	160518
Q96CW1	AP-2 complex subunit mu	AP2M1	1.27514e+06	1.34466e+06	1.04228e+06	1.19747e+06	1.14147e+06	1093195	1.36791e+06	1.35392e+06	1.31644e+06
Q96CV9	Optineurin	OPTN	106726	102044	106740	155448	164618	146085	139491	162992	135761
Q96CU9	FAD-dependent oxidoreductase domain-containing protein 1	FOXRED1	354068	317865	391196	367022	408963	388468	327008	348046	335086
Q96CT7	Coiled-coil domain-containing protein 124	CCDC124	1.32163e+06	1.26017e+06	1.39432e+06	1.31428e+06	1.44514e+06	1.34269e+06	1.18166e+06	1.34318e+06	1.24533e+06
Q96CS3	FAS-associated factor 2	FAF2	1.17599e+06	1.1352e+06	1.03595e+06	1.21362e+06	1.17083e+06	1.20975e+06	1.16732e+06	1.17068e+06	1.20187e+06
Q96CP7	TLC domain-containing protein 1	TLCD1	19560.6	14434.2	19324.6	15062.7	30596.6	26727.8	13430.5	12649.1	16260.5
Q96CP2	FLYWCH family member 2	FLYWCH2	150479	156847	172883	224550	221579	210712	202769	184776	183341
Q96CN9	GRIP and coiled-coil domain-containing protein 1	GCC1	68513	71670	75403.5	92577.3	136050	91198.8	88845.3	85604.5	87818.8
Q96CN7	Isochorismatase domain-containing protein 1	ISOC1	1.29846e+06	1.29593e+06	1.13062e+06	1.39231e+06	1.21333e+06	1.18543e+06	1.27355e+06	1196396	1.26664e+06
Q96CM8	Medium-chain acyl-CoA ligase ACSF2, mitochondrial	ACSF2	100488	96941.9	124519	144151	157782	143369	206281	202850	208280
Q96CF2	Charged multivesicular body protein 4c	CHMP4C	193110	188678	191289	221037	229455	222599	223916	229859	206069
Q96CD0	F-box/LRR-repeat protein 8	FBXL8	135895	157578	176838	165682	164431	148283	151691	182449	113187
Q96CB9	5-methylcytosine rRNA methyltransferase NSUN4	NSUN4	190662	204139	226916	214324	219269	215785	195262	197768	178065
Q96CB8	Integrator complex subunit 12	INTS12	78708.1	74094.7	94767.7	78937.7	91020.5	91092.4	48096.4	71388.4	80362.3
Q96C90	Protein phosphatase 1 regulatory subunit 14B	PPP1R14B	705813	700620	838966	759839	782284	749388	621481	640018	544536
Q96C86	m7GpppX diphosphatase	DCPS	578994	590725	444976	443078	482317	526978	623581	661742	567663
Q96C57	Protein CUSTOS	CUSTOS	296566	303271	270893	275265	269063	274512	327958	306371	323814
Q96C36	Pyrroline-5-carboxylate reductase 2	PYCR2	367951	386688	514985	463752	474462	459497	445265	548373	475211
Q96C23	Galactose mutarotase	GALM	326876	326060	327240	480726	510844	437516	424833	424568	409542
Q96C19	EF-hand domain-containing protein D2	EFHD2	3.21814e+06	3.1375e+06	3835928	2581744	2.85193e+06	2.8525e+06	2.54756e+06	2.76022e+06	2.58393e+06
Q96C12	Armadillo repeat-containing protein 5	ARMC5	63564.7	56903.8	51123.7	46666.3	44075.4	42395.3	47429	48050.3	51903.3
Q96C01	Protein FAM136A	FAM136A	1.10739e+06	1.05399e+06	1.22766e+06	1.00809e+06	1.12288e+06	1082405	1.01117e+06	1.18215e+06	1.16139e+06
Q96BZ8	Leukocyte receptor cluster member 1	LENG1	126884	121583	152386	149122	160382	149339	129923	124091	114611
Q96BY7	Autophagy-related protein 2 homolog B	ATG2B	35424.2	43256.2	50397	40437.8	55445.2	51683	50283.7	42872.7	40660.5
Q96BW9	Phosphatidate cytidylyltransferase, mitochondrial	TAMM41	148152	138536	120704	93823.8	108684	110994	142895	129416	132207
Q96BW5	Phosphotriesterase-related protein	PTER	709619	678381	622644	738970	779354	741266	893476	906592	945516
Q96BT7	Alkylated DNA repair protein alkB homolog 8	ALKBH8	34064.7	33573.5	41635.1	28880.7	35492.9	32780	33264.7	27328.1	23591.2
Q96BR5	Cytochrome c oxidase assembly factor 7	COA7	362101	359213	385699	374173	384082	362718	388241	413728	402778
Q96BP3	Peptidylprolyl isomerase domain and WD repeat-containing protein 1	PPWD1	413439	392411	466481	481752	436946	437152	380255	405778	359380
Q96BP2	Coiled-coil-helix-coiled-coil-helix domain-containing protein 1	CHCHD1	447045	436121	527886	471076	510198	460363	509226	503921	522224
Q96BN8	Ubiquitin thioesterase otulin	OTULIN	199708	211698	203136	200032	231952	206757	208146	232165	227266
Q96BN2	Transcriptional adapter 1	TADA1	163498	156062	193618	188969	183700	165332	166699	169355	175287
Q96BM9	ADP-ribosylation factor-like protein 8A	ARL8A	15768.6	11041	11170.6	20976.4	16265.2	14080.9	23138.8	20579.8	19548.4
Q96BK5	PIN2/TERF1-interacting telomerase inhibitor 1	PINX1	126929	125236	143977	114696	120941	104908	85560.6	112625	106357
Q96BJ3	Axin interactor, dorsalization-associated protein	AIDA	417954	418041	441588	479754	499574	452417	494087	512325	496825
Q96BI1	Solute carrier family 22 member 18	SLC22A18	167474	171839	177018	243422	212048	210390	349616	359533	369792
Q96BH1	E3 ubiquitin-protein ligase RNF25	RNF25	219587	220805	235539	233675	231023	231813	215679	211055	206062
Q96BD8	Spindle and kinetochore-associated protein 1	SKA1	64020	77074.9	109523	85420.1	92960	94359.6	98521.7	103093	97758.9
Q96BD5	PHD finger protein 21A	PHF21A	30287.6	31279.5	35438.4	40992	36319.5	36659.2	45367.3	48754.6	43575.8
Q96BD0	Solute carrier organic anion transporter family member 4A1	SLCO4A1	69714.4	73229.8	65089.1	75272.5	86146.1	92570.4	45254.8	62145	54403.3
Q96B97	SH3 domain-containing kinase-binding protein 1	SH3KBP1	492308	551978	605404	518736	555410	461042	455979	524865	561708
Q96B70	Leukocyte receptor cluster member 9	LENG9	56268	33451.8	72494.3	74594.7	48703.7	54258.9	66746.8	32932.2	64999.2
Q96B54	Zinc finger protein 428	ZNF428	191527	179904	227666	226564	245872	233197	189616	233461	203320
Q96B49	Mitochondrial import receptor subunit TOM6 homolog	TOMM6	4959508	4503331	6.22405e+06	3147617	4995510	4.76487e+06	3.90942e+06	4.52867e+06	3.4679e+06
Q96B45	BLOC-1-related complex subunit 7	BORCS7	21851.8	28708.7	25174.2	20319.4	26252.1	27139.2	26469	21748.1	27711.1
Q96B42	Transmembrane protein 18	TMEM18	131068	133682	132203	160463	146145	153774	82742.4	115522	88281.2
Q96B36	Proline-rich AKT1 substrate 1	AKT1S1	294140	298555	224897	259950	262369	252712	256229	245853	255725
Q96B26	Exosome complex component RRP43	EXOSC8	996213	967890	1.20778e+06	1.0424e+06	1.06565e+06	1096429	882128	947457	854252
Q96B23	Uncharacterized protein C18orf25	C18orf25	114680	118341	166028	177630	157326	171619	77721.6	102434	161130
Q96B01	RAD51-associated protein 1	RAD51AP1	21821.2	24757.6	17730.4	33653.4	30392.9	34258.5	23195.8	35879.7	32453.5
Q96AZ6	Interferon-stimulated gene 20 kDa protein	ISG20	26573.7	28996.6	5818.4	31793.7	16805.5	15406.5	57087.3	40630.1	56756.6
Q96AX1	Vacuolar protein sorting-associated protein 33A	VPS33A	236390	179238	257762	232750	276514	266648	209099	254025	249646
Q96AT9	Ribulose-phosphate 3-epimerase	RPE	661204	721081	583714	655213	584665	610841	710508	729466	722366
Q96AT1	Uncharacterized protein KIAA1143	KIAA1143	103567	105809	122748	69472.8	96624.3	118698	108578	129583	124561
Q96AQ8	Mitochondrial calcium uniporter regulator 1	MCUR1	45796.1	50537.9	56894.9	45712	47233.2	54042.5	59223.8	39354.1	51559.7
Q96AQ6	Pre-B-cell leukemia transcription factor-interacting protein 1	PBXIP1	48191.3	34775.4	44189.5	94850.1	84765.2	106692	99496.7	87606.5	99446.8
Q96AJ9	Vesicle transport through interaction with t-SNAREs homolog 1A	VTI1A	84626.3	110398	100035	114578	131043	123515	73174.9	119446	115166
Q96AG4	Leucine-rich repeat-containing protein 59	LRRC59	5438702	5.494e+06	5.98016e+06	6302915	5994655	6043757	5076404	5335149	5762865
Q96AE7	Tetratricopeptide repeat protein 17	TTC17	148343	161806	166178	177740	175984	163827	121832	159090	158479
Q96AE4	Far upstream element-binding protein 1	FUBP1	3.97621e+06	3.95301e+06	4.68925e+06	3.51579e+06	4.06714e+06	3.80027e+06	3.50708e+06	3.54545e+06	3.5939e+06
Q96AB3	Isochorismatase domain-containing protein 2	ISOC2	168603	172200	97311.4	148226	119746	119277	156693	143739	174875
Q96AA3	Protein RFT1 homolog	RFT1	344648	360376	371617	368685	372827	350009	348893	383535	371288
Q96A73	Putative monooxygenase p33MONOX	KIAA1191	13243.1	14931.9	17614.1	27204.8	30357.8	25020.3	24511.1	20291.4	25881.6
Q96A72	Protein mago nashi homolog 2	MAGOHB	2484112	2.52988e+06	2.79071e+06	2352042	2.54482e+06	2.40437e+06	2308797	2.27304e+06	2.26137e+06
Q96A65	Exocyst complex component 4	EXOC4	245293	234029	301767	261051	236230	274819	288358	301986	302309
Q96A57	Transmembrane protein 230	TMEM230	205304	210075	271295	244423	324330	295107	238028	255988	254180
Q96A49	Synapse-associated protein 1	SYAP1	522404	506645	561650	529167	612670	560795	449410	425951	391117
Q96A35	39S ribosomal protein L24, mitochondrial	MRPL24	596176	611720	589456	553355	572802	555755	560587	596960	555730
Q96A33	Coiled-coil domain-containing protein 47	CCDC47	836351	833889	875971	897440	945347	871199	752417	742501	741772
Q96A29	GDP-fucose transporter 1	SLC35C1	145249	140204	163081	190423	152363	151387	121432	131191	128994
Q96A26	Protein FAM162A	FAM162A	1.38902e+06	1.35014e+06	1.73042e+06	1.50391e+06	1.52552e+06	1.49629e+06	1.39682e+06	1.36985e+06	1.27386e+06
Q969Z3	Mitochondrial amidoxime reducing component 2	MTARC2	16909.1	19794.2	23466.8	37015.4	38230.7	26112.8	23911.8	43160.4	33018.8
Q969Z0	FAST kinase domain-containing protein 4	TBRG4	435114	437000	309242	343622	319096	356880	308395	347987	311500
Q969Y2	tRNA modification GTPase GTPBP3, mitochondrial	GTPBP3	163097	166027	157463	161082	154827	170580	164585	160074	146708
Q969X6	U3 small nucleolar RNA-associated protein 4 homolog	UTP4	735366	785016	791270	824944	738913	722209	666318	702159	689964
Q969X5	Endoplasmic reticulum-Golgi intermediate compartment protein 1	ERGIC1	25904.3	185371	46713.9	50179.9	57792.6	215345	57000	246189	53157.2
Q969X1	Protein lifeguard 3	TMBIM1	129592	97987.4	137501	191896	162296	189189	146964	137263	114871
Q969V3	Nicalin	NCLN	891709	834329	1.03099e+06	975297	1.03111e+06	995242	829245	839940	826900
Q969U7	Proteasome assembly chaperone 2	PSMG2	517039	531035	492469	485157	484906	480351	547144	559145	558708
Q969T9	WW domain-binding protein 2	WBP2	273489	289131	299009	344982	352678	368928	307463	300034	339987
Q969T4	Ubiquitin-conjugating enzyme E2 E3	UBE2E3	75616.3	74452.2	70294.3	60297.2	70733.5	76170.2	54284.3	47619.4	48910.7
Q969S9	Ribosome-releasing factor 2, mitochondrial	GFM2	80969.2	96360.3	53128.3	115495	96166.9	113389	108681	145531	132915
Q969S3	Zinc finger protein 622	ZNF622	536277	522987	599828	534731	582508	567027	434630	465720	443388
Q969R5	Lethal(3)malignant brain tumor-like protein 2	L3MBTL2	49692.7	46729.5	59840	66134	66115.4	57884.5	27795.2	55575.1	46881.5
Q969Q5	Ras-related protein Rab-24	RAB24	25519	14965.9	31542.2	29427.5	28046.3	31278.2	27815.8	29112.4	32610.1
Q969Q0	60S ribosomal protein L36a-like	RPL36AL	841170	990348	1.03363e+06	907980	782746	933691	809337	918091	896410
Q969P6	DNA topoisomerase I, mitochondrial	TOP1MT	584317	578093	420507	490800	414017	458531	591892	544370	572981
Q969N2	GPI transamidase component PIG-T	PIGT	166634	190287	150760	170687	174082	182986	182665	194404	217891
Q969M3	Protein YIPF5	YIPF5	319760	331783	357480	436488	378004	354897	366965	361621	377533
Q969L2	Protein MAL2	MAL2	1.65274e+06	1502050	1.98355e+06	2.36448e+06	2.25924e+06	2.09032e+06	2.0779e+06	2016464	1.94436e+06
Q969K3	E3 ubiquitin-protein ligase RNF34	RNF34	50828.1	27715.1	51415.5	56365.4	52947.8	43715.2	35331.7	51244.7	38874.9
Q969J3	BLOC-1-related complex subunit 5	BORCS5	267819	232970	248764	218518	283626	271754	233331	232775	217235
Q969H8	Myeloid-derived growth factor	MYDGF	720815	685793	837219	926546	907006	868468	668170	666884	633617
Q969H6	Ribonuclease P/MRP protein subunit POP5	POP5	202857	209710	138919	184977	164743	160619	193646	177424	178271
Q969H4	Connector enhancer of kinase suppressor of ras 1	CNKSR1	41939.8	41652.2	30551.2	53247.1	47294.8	53915.1	58340.6	58161.4	60180
Q969G6	Riboflavin kinase	RFK	124635	104192	161861	158079	162951	165223	131004	141947	136837
Q969G3	SWI/SNF-related matrix-associated actin-dependent regulator of chromatin subfamily E member 1	SMARCE1	572084	548536	649015	553411	627395	648023	517441	583067	552855
Q969F9	Hermansky-Pudlak syndrome 3 protein	HPS3	79420	75726.3	81464.7	74293.5	73598.5	69274.3	68689.4	75099.6	80545.5
Q969E4	Transcription elongation factor A protein-like 3	TCEAL3	47733	44593	49476	78050.7	83285.6	67683.2	69385.8	64900.4	65143.3
Q969E2	Secretory carrier-associated membrane protein 4	SCAMP4	256481	221445	304665	339152	479033	288914	236848	316137	268930
Q93096	Protein tyrosine phosphatase type IVA 1	PTP4A1	355698	366206	392242	381439	389936	375329	399650	401254	389397
Q93074	Mediator of RNA polymerase II transcription subunit 12	MED12	64874.7	69152.3	46557.2	73287.2	52830.5	56876.9	71607.1	60389.9	69334.8
Q93063	Exostosin-2	EXT2	148533	154716	146640	178259	191566	194796	188183	198428	193314
Q93052	Lipoma-preferred partner	LPP	486623	516576	562569	799852	707378	722657	532862	541103	467823
Q93050	V-type proton ATPase 116 kDa subunit a1	ATP6V0A1	217418	222972	224589	270706	261007	254939	195247	196010	209415
Q93034	Cullin-5	CUL5	673152	642171	671125	522714	555115	556410	693428	640366	574073
Q93009	Ubiquitin carboxyl-terminal hydrolase 7	USP7	1.41891e+06	1.39793e+06	1.49522e+06	1.44794e+06	1.40605e+06	1.33952e+06	1.33195e+06	1411191	1.32138e+06
Q93008	Probable ubiquitin carboxyl-terminal hydrolase FAF-X	USP9X	747633	769029	761095	857408	857130	787134	841384	841565	793945
Q92995	Ubiquitin carboxyl-terminal hydrolase 13	USP13	119425	122529	134665	109484	137992	121811	98149.1	114767	114414
Q92993	Histone acetyltransferase KAT5	KAT5	39979.8	37392.3	45622.9	37845.7	40986.2	47332.7	25166	42152.5	26196.2
Q92990	Glomulin	GLMN	916568	888879	889469	570770	582315	710169	796202	774921	820238
Q92989	Polyribonucleotide 5'-hydroxyl-kinase Clp1	CLP1	254810	267860	267350	217630	250591	238438	190129	253256	233499
Q92985	Interferon regulatory factor 7	IRF7	13632.7	14885	17122.4	42328.5	42789.4	35384.9	28674.5	41723.9	36464.6
Q92979	Ribosomal RNA small subunit methyltransferase NEP1	EMG1	1.57684e+06	1.50394e+06	1.66587e+06	1.54926e+06	1.55457e+06	1.55626e+06	1.35377e+06	1.36803e+06	1.40615e+06
Q92974	Rho guanine nucleotide exchange factor 2	ARHGEF2	211250	213814	228814	231404	221450	233080	273915	266510	267457
Q92973	Transportin-1	TNPO1	3.83032e+06	3.83916e+06	3555748	3.52577e+06	3.43103e+06	3.43562e+06	3.58424e+06	3579628	3.74039e+06
Q92968	Peroxisomal membrane protein PEX13	PEX13	98825	109991	131871	168990	179528	153141	125008	145826	127780
Q92947	Glutaryl-CoA dehydrogenase, mitochondrial	GCDH	292940	281278	309712	289906	317335	282720	323430	342513	310129
Q92945	Far upstream element-binding protein 2	KHSRP	10650322	10567761	11405469	10304825	11175677	10933469	9391108	9754778	9628550
Q92934	Bcl2-associated agonist of cell death	BAD	49398.3	61232.5	63417	78398.7	78326.6	89449.6	68385.3	64472.4	61679.2
Q92930	Ras-related protein Rab-8B	RAB8B	170027	171804	141195	198533	189843	195037	240901	201188	226439
Q92925	SWI/SNF-related matrix-associated actin-dependent regulator of chromatin subfamily D member 2	SMARCD2	171230	176767	180466	193752	217696	212783	192169	168952	189725
Q92922	SWI/SNF complex subunit SMARCC1	SMARCC1	1327661	1.28458e+06	1.57174e+06	1.5015e+06	1.58122e+06	1.41151e+06	1.2273e+06	1243468	1217152
Q92917	G-patch domain and KOW motifs-containing protein	GPKOW	496286	564842	554312	425389	604402	550288	500458	560307	529240
Q92908	Transcription factor GATA-6	GATA6	125469	150257	163817	158064	157347	136485	118658	141195	125828
Q92905	COP9 signalosome complex subunit 5	COPS5	573734	588271	674864	610464	604147	601302	604615	657610	654741
[truncated: 4,051 more rows]
