# Supplementary material for: Proteome-Wide Analysis Reveals TFEB Targets for Establishment of a Prognostic Signature to Predict Clinical Outcomes of Colorectal Cancer
Source: Cancers (Basel). 2023 Jan 25;15(3):744. doi: 10.3390/cancers15030744 (PMC9913156; doi:10.3390/cancers15030744)
Supplement: Supplementary file 1 [file cancers-15-00744-s001.zip › Table S2.xlsx]

## Sheet: Table S2
Table S2. The differential expressed proteins in TFEB-S142A/S138A vs TFEB-WT and TFEB-WT vs control datasets
TFEB-S142A/S138A vs TFEB-WT				TFEB-WT vs Control
Gene Name	Log2 FC	P.Value		Gene Name	Log2 FC	P.Value
PI4KA	2.40646	0.04595		CAN3	5.5638	8.48978e-06
DIRA2	2.39243	0.00584741		TXIP1	5.03785	1.39288e-05
MET7A	2.32591	9.32878e-05		CYTD	3.82978	0.000242168
CYTD	2.05651	1.56831e-05		DIRA2	2.72126	0.0101756
H90B4	2.02855	0.00191517		FBX28	2.64442	0.0237974
ELP5	1.76712	7.34994e-06		NIPA1	2.32221	0.00342385
AEBP2	1.59616	8.17745e-05		TAB1	2.13509	1.26542e-05
NADC	1.54171	2.60475e-06		STAT1	2.11404	3.04793e-05
ARVC	1.50952	0.00281514		TM238	1.7241	0.0459823
CERS5	1.50656	0.029623		ID1	1.67485	6.61745e-06
S10A4	1.39246	5.3808e-07		CXCL5	1.67437	5.86981e-06
ISG20	1.3331	0.00398107		KPRP	1.66464	0.00220761
TBAL3	1.32899	0.00110465		RETR2	1.66282	0.00175075
RA54B	1.32103	0.00276537		TNNC1	1.64581	4.92784e-05
LRRK1	1.2169	0.00273429		ARCH	1.49916	0.00161482
BBS2	1.20793	0.00246275		DDB2	1.48289	0.0264511
JMJD7	1.20162	1.31938e-06		XCT	1.43497	6.10328e-06
TM41A	1.19954	0.00451678		NGAL	1.41061	1.54815e-06
VPS39	1.18306	0.00329214		IRF7	1.40173	9.15216e-06
ACD10	1.17704	2.48153e-05		ASGL1	1.39229	0.000510161
ABRAL	1.15777	0.00546304		KCRU	1.36704	0.0343821
TSN1	1.14947	0.00600949		TR10B	1.35075	0.000302393
HAUS6	1.12535	0.0394498		UBP1	1.32031	0.00102867
WDR59	1.09743	0.0386038		GP108	1.29251	0.00153971
UQCC2	1.06911	0.0196978		HBD	1.24011	9.18345e-07
TF7L2	1.05171	0.0394469		TPM1	1.23901	3.31999e-05
MPIP2	1.04702	0.00186223		VTNC	1.22892	0.000717295
FMN1	1.04461	0.00857637		ANXA9	1.21031	1.19088e-05
FEM1C	1.03737	5.90756e-05		HMDH	1.20327	0.000160536
ARP6	1.03582	3.29059e-05		SPICE	1.20042	0.00354341
ACK1	1.01608	4.21571e-05		A1AT	1.19986	0.012002
SCAP	1.00513	0.000721165		IN35	1.18902	0.000100433
S15A4	1.00242	0.0241871		CN119	1.18357	0.00256795
UD19	1.00146	1.86136e-05		PBIP1	1.17799	0.000104503
AT5G1	0.969714	0.0395765		ZN703	1.17704	0.000100538
JIP4	0.967303	0.00119973		TPC6A	1.16967	0.000359884
N6MT1	0.964139	0.00135038		KAP3	1.16106	0.00123924
MKRN2	0.956681	0.000803613		NMES1	1.15524	0.000149245
H2AX	0.936621	0.0119849		APLP2	1.14344	2.3494e-05
TAB1	0.921799	0.00022515		H13	1.14242	0.00547421
ANAG	0.919108	9.01767e-06		TMM59	1.13755	0.00011924
ARGI2	0.915548	0.000192903		MACF1	1.13743	1.23156e-05
RUSD3	0.907078	0.0014467		E41LB	1.13518	0.00164667
CENPI	0.905908	0.010279		SBSPO	1.13012	1.80186e-05
A1AT	0.896438	0.000535131		OLR1	1.11974	2.68234e-05
G3ST4	0.894221	0.00849888		CYTC	1.11552	6.46055e-05
CYB	0.889464	0.00348011		CMIP	1.11031	0.0195054
VWA3B	0.882887	0.000356261		I13R1	1.10822	0.00617013
NB5R2	0.878337	0.000600977		MRP4	1.07528	1.80461e-05
TOR2A	0.877805	0.000887474		UD19	1.071	1.96023e-05
GILT	0.87735	0.0206507		TMUB2	1.07087	0.00249863
PM34	0.860407	0.000225718		TMCO4	1.07039	1.32595e-05
PDIA5	0.855308	3.55196e-05		CAD17	1.05917	0.000116221
RIN1	0.835048	0.00218129		LRP10	1.05676	8.92138e-05
NU1M	0.832863	8.20754e-05		PAF15	1.0565	0.000385397
LMBRL	0.827128	0.0149864		TLN2	1.05631	0.00997856
SYTL2	0.825603	6.83198e-07		CEBPB	1.05572	3.18781e-05
CATH	0.803274	0.00116214		ADSV	1.03368	0.00748739
C2CD2	0.796739	0.0463208		CCD78	1.03287	0.000133744
AASD1	0.792067	5.05237e-05		LRP8	1.0249	0.00216972
PLD2	0.792037	8.74236e-05		NFIP2	1.02173	2.91067e-05
MRP4	0.788814	0.000312556		LAP4A	1.00982	0.00511924
GLNA	0.787334	0.0304216		PORED	0.98677	0.000167551
GSDMA	0.780346	3.20044e-05		PDIA5	0.986403	2.31276e-05
KDM2B	0.778211	0.0445191		OAS1	0.98186	3.64195e-06
SBP1	0.772647	5.78101e-06		E41L5	0.980773	0.000207646
NDRG1	0.770967	0.0116749		ATAD2	0.97817	1.83811e-05
CDC7	0.767171	0.0359662		HJURP	0.965001	0.0191067
GP107	0.763211	6.00315e-05		ZFAN5	0.961354	0.000201192
GPCP1	0.755569	0.0049359		THRB	0.952151	0.00125268
FA98C	0.754876	0.0190063		AGRIN	0.947562	0.000270503
IFT57	0.744207	0.00408315		RDHE2	0.941195	0.000733536
ST1A3	0.73659	0.000567549		NIBA1	0.928313	0.00108235
CACP	0.733372	7.72158e-05		CEP55	0.925633	0.000223932
CLD7	0.728414	0.00172658		JMY	0.922361	0.0001335
AK1C3	0.725102	2.33742e-06		HEM2	0.916428	0.00116069
K0754	0.714075	0.000556389		ALKB7	0.914865	1.78569e-05
EEPD1	0.710097	0.00207955		UBE2C	0.914107	9.08172e-05
Z3H7B	0.708702	0.0123287		SGO1	0.910149	1.35772e-05
MGST1	0.707065	5.82629e-05		NFIB	0.901404	0.0384822
CD44	0.699651	0.000521413		ERG1	0.897308	1.06679e-05
S22AI	0.699231	4.73428e-05		FPGT	0.893042	0.00541489
SIR3	0.691992	0.00253944		KIFC1	0.892771	3.12462e-06
BTD	0.68663	0.000116713		CRUM3	0.889925	0.000695036
WDR83	0.686351	9.87737e-05		FRK	0.889556	0.000373469
VTNC	0.679655	6.23352e-05		DCAM	0.88301	0.000247351
CB39L	0.677078	0.0022605		TX264	0.877925	0.000158299
U119B	0.6748	0.0261417		HID1	0.876713	0.000131429
ERO1B	0.673252	0.00134353		PRC1	0.874373	0.0113991
UB2L6	0.673203	6.5416e-05		MELPH	0.872946	1.17754e-05
AGRG1	0.671906	0.00621041		PLBL1	0.864463	9.22946e-06
KDM5A	0.671117	0.0377912		FA32A	0.862084	1.15094e-05
NAL13	0.665879	4.06552e-06		FRIL	0.860343	0.00764053
PX11C	0.661388	0.00232707		CPT1A	0.859742	0.000110112
BGLR	0.661334	0.000441868		P33MX	0.856216	0.000307964
NOL6	0.651383	0.000372086		TFAP4	0.854126	0.0278109
ECI2	0.65027	0.000358353		CLD1	0.84589	0.00280052
ANR22	0.645291	0.00428592		XYLK	0.842762	0.00583346
DHSD	0.644403	9.13844e-05		BCAM	0.840208	0.0150557
NIBA1	0.644235	1.35166e-05		STOM	0.837644	0.00203038
PDCD4	0.642532	6.63549e-05		TM50A	0.837285	0.00111878
SCFD2	0.63503	0.0168992		CUL7	0.834935	3.6606e-05
TRY2	0.634143	0.00180188		ITM2C	0.826751	0.0130972
MET7B	0.630713	0.000323221		SPIT2	0.816985	1.45195e-05
PTMS	0.630581	0.00729127		RBIS	0.815596	0.00110084
MARE3	0.628626	0.000773628		CKP2L	0.813224	0.000100244
SAP	0.627226	0.000197927		SPT20	0.810425	0.00381483
WDR11	0.615527	0.00491819		S100P	0.808557	5.07049e-05
TTC9C	0.613448	0.0363986		R3HD4	0.804085	0.00257626
AAKB1	0.608062	0.0111451		HXA13	0.797072	0.00256126
TRI38	0.603876	2.94503e-05		MOFA1	0.791371	0.0159459
LG3BP	0.60225	6.59315e-06		OFUT2	0.78812	0.00315259
COX16	0.599818	0.0133909		GOLM1	0.787338	0.000507506
ZFY26	0.598596	0.0179015		TPRGL	0.783155	4.44082e-05
TBB3	0.592774	0.00254645		SPP2B	0.782971	0.00170718
ARMC9	0.592405	0.0341408		PP6R3	0.782151	0.0227189
TM1L2	0.592089	2.09192e-05		PARP4	0.780081	0.00223235
G6PC3	0.59206	0.0133154		MO4L2	0.777255	2.50773e-05
B3GA3	0.589059	0.00207491		UN13B	0.775692	3.16025e-05
TPP1	0.588899	0.00649123		LLR1	0.772771	8.9933e-05
MAGI3	0.587123	0.0254064		CDC20	0.771869	0.000251338
M4K2	0.583808	0.00114476		LXN	0.767089	2.61007e-05
ENPP4	0.576348	4.21566e-05		TSN6	0.764831	0.000124391
SPB9	0.575904	0.000195912		CHCH2	0.762911	3.97338e-05
RISC	0.575143	0.000263774		KIT	0.75987	0.0019922
PDK3	0.572201	0.00069493		POMP	0.759266	0.000622247
FKBP5	0.572043	0.000252625		ASNS	0.759231	5.99376e-05
STA5B	0.571523	0.0130957		MTAP2	0.758388	0.000828654
FYCO1	0.567406	0.0309051		TISB	0.757727	0.0047891
BDH2	0.566957	4.28835e-05		RN149	0.75602	0.000581546
ATP5S	0.565111	0.00122509		MECP2	0.753406	0.000109006
COMD2	0.56402	0.0451888		IBTK	0.747136	0.0255937
MIF	0.563291	0.0111093		BORG1	0.745838	0.0130176
SORT	0.5614	0.00144381		2022-03-02	0.744707	0.00517487
FIBP	0.56134	0.0034108		CEP41	0.742055	0.00046183
AP2S1	0.558556	0.0387763		PBDC1	0.737538	0.000123728
TRI13	0.55755	0.0100265		AK1C3	0.733994	7.90462e-06
MOD5	0.556707	0.00633547		FLOT1	0.733649	1.16345e-05
RHG18	0.556348	0.000305697		FN3K	0.731937	0.000302359
SWET1	0.556086	0.00071378		CUED2	0.731513	0.0135055
GGH	0.55487	2.86219e-05		ZFY21	0.72981	0.0214372
ERN2	0.553191	7.33131e-05		DJC13	0.728764	0.0498007
MA2B2	0.550546	0.000537774		STAR7	0.726695	0.00589547
CASPA	0.549411	0.00232603		FLOT2	0.724773	0.00064359
ORC5	0.549025	0.00381424		PPOX	0.722646	0.0373118
TXNIP	0.546834	0.00101538		KEAP1	0.722526	0.00528195
CISD1	0.546757	0.000178889		MP3B2	0.720927	9.39859e-05
TTPAL	0.544605	0.0202397		CGL	0.720424	0.0001411
MAON	0.542551	0.000896279		AHNK2	0.718059	0.000201316
SPE39	0.539921	0.00727941		S38AA	0.717059	0.0037275
TT39B	0.537509	0.000769744		TSYL1	0.716793	0.00183034
GALC	0.53595	8.06868e-05		OBRG	0.716214	0.00968558
MBLC2	0.534739	0.00284668		PAFA2	0.714721	0.0051832
RLA1	0.532955	0.0011682		CDC73	0.712745	0.00824481
VILL	0.531685	0.000893897		TSN15	0.710659	0.000291773
RHEB	0.529878	0.00942519		F234A	0.707201	0.000386341
CBAR2	0.529596	0.000383743		MMAD	0.701248	0.000519514
ULK3	0.529165	0.0446175		STBD1	0.699668	0.000104683
REX1B	0.528224	0.0154202		WEE1	0.696004	0.00183876
ABCD1	0.526981	0.000934795		TPPC5	0.694902	0.00190853
TNR6	0.526568	0.00135203		RPC2	0.693969	0.000813307
PXL2A	0.526216	8.47245e-05		K1671	0.6919	0.00041619
KBL	0.520462	9.26506e-05		NUSAP	0.691816	0.000133272
PTK7	0.519534	5.5907e-05		SAS6	0.689031	0.0348356
PRDX2	0.518727	1.8731e-05		TCAL3	0.687582	0.000216436
PLBL2	0.518205	3.82317e-05		CAVN1	0.687233	0.00553741
BGAL	0.517657	6.53558e-05		TSC2	0.686625	0.00190546
I20L2	0.517484	0.0127643		PSB9	0.68583	0.0257642
MLXPL	0.514204	0.000239031		PGDH	0.683305	0.00223691
GRAN	0.512835	5.90001e-05		EMC9	0.682667	0.000583878
COR1A	0.511403	1.22366e-05		PRAF1	0.680771	0.000177664
FA83D	0.508561	0.0205401		SPB5	0.678563	0.000270553
RNT2	0.50785	0.00053397		P53	0.672447	0.000454573
DPOE2	0.507769	0.00208685		RAP2C	0.670407	0.00368764
ASM	0.506713	0.00166968		FXYD3	0.669344	0.00128443
TPC1	0.503625	0.0275172		AASS	0.665256	0.00222764
TPD53	0.5032	1.23209e-05		APOA1	0.665125	1.35364e-05
DIAC	0.502044	0.00228732		TPRN	0.6633	0.00134008
PHLB2	0.499931	0.000103778		OSBL5	0.658331	0.00588211
FAAA	0.4995	7.94305e-05		SDSL	0.65803	4.03698e-05
DHX36	0.49812	0.0314327		TIMP1	0.657768	0.00599847
AGAL	0.493493	0.0011462		TULP3	0.657309	0.0150809
TIM29	0.493371	0.000385813		PTGR1	0.65728	0.00996454
BCL10	0.492187	0.0360977		NBL1	0.651447	0.000865612
GMPR1	0.491898	0.00932584		FBLI1	0.650422	0.0144013
ENAH	0.491556	0.0115696		UB2L6	0.645578	0.000127705
PLS3	0.490596	0.00527172		CA198	0.641693	0.018983
H10	0.489307	0.00243164		VP37C	0.639351	0.000382978
MIO	0.488703	0.000100984		VILL	0.638402	0.00396386
PHF14	0.488534	0.00110774		SHCAF	0.634392	0.00142788
CPVL	0.48618	0.000122156		ZN593	0.632048	0.00300781
CHSS2	0.485332	0.00102923		BI1	0.631151	0.00153111
CGL	0.48392	0.000112596		M17L2	0.628932	0.000376414
PSB10	0.481809	0.00103855		NQO2	0.62783	2.76724e-05
CYBC1	0.478463	0.000546851		ZNF3	0.627416	0.00067113
RL37	0.476606	0.000309281		GPAT1	0.625807	0.0332388
ATIF1	0.476003	0.00364009		R51A1	0.623705	0.00222823
DYL2	0.475934	0.00561608		CD99	0.620913	0.000124924
ASAH1	0.474328	0.000587847		SELS	0.619553	0.00662719
ACSF2	0.47277	9.72112e-05		FOSL2	0.619178	0.000217586
BI1	0.472701	0.000250406		DAF	0.619025	0.00171708
POF1B	0.472272	0.000276628		CDK17	0.618987	7.55022e-05
PLGT3	0.471694	0.000554909		RN213	0.618663	0.00491758
S2540	0.471496	0.000670656		MIA2	0.618051	6.61069e-05
MROH1	0.471477	0.00156025		STXB5	0.617909	0.00136317
MTND	0.469785	3.82776e-05		IFRD1	0.617902	0.0272824
STAR4	0.46857	0.000206769		GBRL2	0.617062	0.0063452
IDH3G	0.464965	0.00223792		ZN511	0.615319	0.00090404
T10B	0.46423	0.012259		GRN	0.614967	3.28443e-05
ERAP2	0.463181	0.000654875		MET	0.614167	0.0106477
SENP8	0.460569	0.0028658		BACD3	0.608348	0.0124399
TACAN	0.459838	0.000110998		QSOX1	0.60695	9.48153e-05
RPP40	0.458493	0.0022617		STING	0.606347	7.58748e-05
ASPG	0.458145	0.00448963		IKBB	0.606153	0.000586851
LITAF	0.456381	0.00101095		ZFAN6	0.60604	0.000195267
ARHGB	0.454954	0.00214425		DP13B	0.60585	0.0126707
PXK	0.454658	0.0107483		EAA3	0.602928	0.0191046
PGDH	0.454462	6.86359e-05		NEMP1	0.601497	0.0301658
KDM4B	0.453388	0.00217113		G6PE	0.60037	6.23975e-05
CF047	0.453155	0.000161356		SHFL	0.596585	0.00768605
PDZ11	0.450242	0.00624697		ECHP	0.594576	0.00126914
C560	0.446467	0.0189116		HSP13	0.594291	0.000254944
ZW10	0.441859	0.000580321		MRP5	0.594038	0.0170597
CP2J2	0.440905	0.00391116		PTGR2	0.593972	0.000223434
PCBP3	0.440385	0.00868931		MAFG	0.593017	0.00148527
APBA1	0.439529	0.0022205		ESRP1	0.591967	0.00259656
CCNT1	0.437744	0.00197457		IGSF3	0.590817	0.00968958
KNL1	0.437157	0.0195859		INGR1	0.590648	0.000180105
LTOR5	0.43594	0.0124603		DDX58	0.589686	0.000140044
KBRS2	0.435434	0.035561		DP13A	0.587019	7.33254e-05
RASN	0.434957	0.00164778		SERA	0.585788	0.000426333
NDUB8	0.434769	0.00485563		S12A7	0.585738	0.00117663
LRIF1	0.4345	0.00950902		LFG3	0.584903	0.00517318
KCC2B	0.429435	4.03017e-05		TGON2	0.584045	0.00347338
NDUF7	0.428853	0.00130492		SIAE	0.583929	0.00180591
SCRB2	0.428774	0.00581896		VIP2	0.582782	0.00106021
SAP3	0.428704	0.0421651		CIB1	0.582728	0.00012032
NDUAC	0.427192	0.0204626		PGPS1	0.582213	0.03801
TSTD1	0.427148	0.000387513		CKAP2	0.581975	0.0021714
BSCL2	0.426735	0.00480513		SERF2	0.580069	0.00155243
COMT	0.423568	0.00336311		MELK	0.579468	0.00132487
FUCO	0.423168	3.17717e-05		ECT2	0.577474	0.00197965
P5CR1	0.420677	0.00112042		JOS1	0.576377	0.000537413
EXD2	0.418803	0.00942857		GSTM4	0.57423	0.0169753
MTMR9	0.41858	0.000279576		STPAP	0.573254	0.00154437
NHEJ1	0.414476	0.0418517		FARP1	0.572629	0.00462703
PLOD2	0.413575	0.00087696		ARP6	0.571629	0.0134349
HIBCH	0.413422	0.000974567		ZN852	0.571443	0.00186152
COMD9	0.412343	0.000122264		SYNM	0.570295	0.0271132
SBSPO	0.411717	0.000160387		ABCBB	0.567969	0.000492623
ITA3	0.411259	0.000544849		ICAL	0.567863	0.00692871
BLMH	0.410504	0.000453849		ASCC1	0.56711	0.00119624
KT3K	0.409509	0.00275649		TLE5	0.566575	0.00182193
SYSC	0.408522	0.00278697		RFIP5	0.566414	0.00150242
ASSY	0.408161	0.000151019		PEX13	0.565516	0.00264492
ACBD6	0.408143	0.00021088		COPB	0.564352	0.0107549
CATC	0.407828	0.000169185		NQO1	0.563051	0.000215883
FACE2	0.405179	0.000195911		OPTN	0.561713	0.000113536
KPRA	0.402371	0.0229767		IFT27	0.561647	0.00010259
MGME1	0.400242	0.00336037		UPP1	0.560737	0.0004804
PSB9	0.40021	0.000513232		DHRS1	0.560295	0.000108949
MRGBP	0.39936	0.0113161		HIG2A	0.559434	0.00684848
ADA15	0.399179	0.0359429		PTN6	0.558885	0.00135338
ZER1	0.395599	0.0263129		DNJB2	0.558681	0.00126394
OSGP2	0.395176	0.0112505		ZFAN1	0.558173	0.0132426
MANBA	0.39002	0.000104889		HLAA	0.556909	0.000477158
CEBOS	0.38915	0.00457288		ZO3	0.556698	7.64424e-05
PAG15	0.388948	0.00114458		FRDA	0.555815	0.0251429
MPIP3	0.386902	0.00392838		CTL2	0.554621	0.00522678
SCRN2	0.385616	0.000271573		OGFR	0.552586	0.0013099
APAF	0.385429	0.00147797		TPX2	0.552165	0.00234836
NDUS2	0.384641	0.000106587		NCOA7	0.551325	0.000182003
NHLC3	0.384273	0.000245072		PLPP1	0.55124	0.000404762
IAH1	0.383294	0.0235484		MVP	0.550204	0.000277072
ARL3	0.382174	0.0268389		A4	0.549137	0.0014485
CND2	0.382057	0.0130149		GPS2	0.548571	0.0319829
PX11B	0.381998	0.0123373		BOREA	0.547375	5.78706e-05
CYC	0.381548	0.0199018		GGT1	0.547052	0.000184807
ACLY	0.380567	0.00959197		ITPK1	0.546253	0.0184021
AHR	0.378692	8.62848e-05		KDM4A	0.545877	0.00010213
ARMT1	0.377803	0.011675		IFM1	0.544961	0.0106336
HYES	0.377733	0.000160768		MMSA	0.544886	6.56234e-05
MADD	0.377723	0.0089953		GCC1	0.544454	0.0123661
SOSSC	0.376043	0.0104421		MED9	0.543038	0.0199977
VISL1	0.375005	0.017423		RGAP1	0.541351	0.000915042
PDCD6	0.373547	0.0136621		GALM	0.541067	0.000223707
SUOX	0.373506	0.0106173		COA5	0.539121	0.0020736
NDUB9	0.37292	0.000512105		METH	0.537186	0.0121765
KAD1	0.372321	0.00468369		CLD3	0.536829	0.00941834
NS1BP	0.371203	0.00859733		GRB7	0.536701	3.90653e-05
TAM41	0.370368	0.00340228		ST1A3	0.536401	0.0448129
DP13B	0.370183	0.0013609		LAMC1	0.535703	0.000254075
NPC1	0.367663	0.000537022		SH3L1	0.535364	0.000182469
PTH	0.367493	0.0147319		GGNB2	0.534747	0.00126163
GLMN	0.366786	0.00669314		OS9	0.534611	0.00336061
CTF8	0.362996	0.0349759		RRF2M	0.534404	0.0444134
P4HA2	0.362544	0.00100763		KI20A	0.534152	0.00692455
SPN90	0.361338	0.00643074		RHBT3	0.531811	0.00380317
DCTD	0.361281	0.0163468		RIR2	0.531065	0.00712252
TSN13	0.361026	0.000709935		CDCA5	0.530942	0.000276217
COX8A	0.360942	0.0236473		MED21	0.530372	0.0241743
T22D2	0.360703	0.00551957		SIGIR	0.530337	0.000245291
L2HDH	0.360573	0.0430786		KLK6	0.530262	0.00182298
TIMP1	0.360509	0.0249457		TM50B	0.530015	0.00240539
HDHD3	0.360422	0.0237007		ZN768	0.527287	0.0112436
TBC13	0.359662	0.0221485		PIBF1	0.527143	0.000141703
PSD10	0.359493	0.00691728		PHLP	0.525865	0.0279577
ATP68	0.359242	0.0024689		WDR76	0.524017	0.000967154
STK24	0.358964	9.80572e-05		SPCS1	0.523274	0.000814448
RUXGL	0.358825	0.0231126		DNS2A	0.521813	0.000659738
C2CD5	0.358709	0.000787297		PLS1	0.520592	0.000377624
ACOD	0.358445	0.000677784		PERP	0.519337	0.00339932
SRR	0.356248	0.00988717		P4HTM	0.518553	0.041765
TM87A	0.35596	0.00106378		CRIPT	0.51818	0.00170565
STXB1	0.355374	0.00127173		IFIT2	0.517236	0.00300472
OTU1	0.355041	0.000539486		CCNB2	0.51641	0.00699639
MTCH2	0.35477	0.000777596		LMBL3	0.516251	0.00176006
HEAT6	0.354205	0.0154062		SPT2	0.515076	0.00082944
TEFM	0.353178	0.00349891		PCKGM	0.512686	0.000166787
DCPS	0.352198	0.00628909		GNAI1	0.512612	0.0164225
BSPRY	0.350279	0.014791		GALT	0.5126	0.00690439
HPCL1	0.349159	0.0165355		KIF22	0.512247	0.00322126
CP51A	0.348787	0.00234015		NUCB2	0.511787	0.000671822
ALG11	0.348571	0.0138911		NLRX1	0.511206	0.00123536
DNPH1	0.347409	0.0207791		MUC13	0.510626	7.69834e-05
BIRC5	0.34735	0.00577574		LPP	0.51057	0.000623951
RLGPB	0.346984	0.0427538		FEZ2	0.509134	0.0130229
HSBP1	0.346653	0.00355697		MT21D	0.508321	0.0271603
SSDH	0.346224	0.000142699		CCYL1	0.507588	0.00428557
ADT1	0.34528	0.00237641		ACS2L	0.506592	0.0252094
ACSA	0.344297	0.0109137		F177A	0.506036	0.00199218
KANK2	0.344261	0.0463527		BAD	0.505926	0.00356156
TM1L1	0.344245	0.000829176		ALR	0.504723	0.00130971
CPNE1	0.344234	0.00343794		TRI16	0.504588	0.0317817
NT5D2	0.34396	0.00043663		CENPM	0.503678	0.000113507
FPRP	0.34377	0.0018221		OARD1	0.501943	0.000447175
KCC2D	0.342398	0.000315669		GLCNE	0.501913	0.00023651
DDAH2	0.342061	0.000490263		CCNB1	0.501896	0.0010645
CDC23	0.341928	0.0138474		P3C2B	0.501561	0.0191343
THTM	0.341865	0.00390479		CLDN1	0.500044	0.000932116
TBA4A	0.341529	0.000340679		SYHM	0.499895	0.0301793
S10A6	0.340875	0.000655422		RREB1	0.499281	0.0290293
COG5	0.340611	0.01296		RILP	0.498499	0.00368622
CATD	0.339955	0.000293996		CATZ	0.498468	0.000327707
NNRE	0.338197	0.0054519		MANBA	0.498017	7.72046e-05
E2AK4	0.337865	0.00719775		DSG2	0.497794	0.00120816
BRAF	0.336246	0.028811		TAP1	0.497255	0.000241167
CATB	0.336107	0.000368763		SAMD9	0.496801	0.000210169
MBOA5	0.335914	0.00330594		TACC3	0.496646	0.000454147
DLP1	0.335906	0.00787007		GDPD3	0.49547	0.000131149
HAP40	0.335758	0.00367555		AAKB2	0.495371	0.00340375
NDUA4	0.333919	0.024211		AURKB	0.493293	0.000500575
NPS3A	0.333844	0.000333121		HOIL1	0.493287	0.00128748
LTOR2	0.333591	0.0172884		HMOX1	0.493082	0.00575751
NIPS1	0.332598	0.0154628		PGH2	0.492723	0.000685527
KCC1A	0.330641	0.0485911		ITA5	0.492671	0.00762611
IPO8	0.329374	0.00257863		CDCA2	0.491926	0.000970003
TOP1M	0.328856	0.00422025		RHOB	0.490271	0.00414629
PSB8	0.328628	0.000359254		TDRKH	0.489581	0.0478995
RTN3	0.328508	0.0446572		RBP10	0.48907	0.00637376
TMED4	0.328345	0.00245105		MET2B	0.489002	0.00531509
ADPPT	0.327772	0.0374207		HSF1	0.48792	0.00196918
PREP	0.327075	0.00842448		LIMD1	0.485983	0.000525583
PAAF1	0.325332	0.00257043		FA8A1	0.485508	0.000238916
GOGA3	0.324656	0.000263832		VP26C	0.485274	8.86436e-05
NDUS8	0.323965	0.00178287		ACVR1	0.484633	0.0379361
COX6C	0.32348	0.000229177		TLE3	0.483613	0.00030561
DYLT1	0.323132	0.00313044		NDUAB	0.482892	0.000191726
EHF	0.321031	0.0348678		PLCA	0.481077	0.00190632
RN185	0.320298	0.0380702		OCLN	0.480828	0.00316596
PALD	0.319934	0.000351047		TM263	0.480168	0.00253003
GLTP	0.31925	0.0139606		CP2S1	0.479062	0.00515132
KLH22	0.318919	0.00269491		RAD51	0.478269	0.0017861
G6PE	0.318133	0.000921413		LAMB3	0.477947	0.000548156
WASC3	0.317625	0.00100839		MEF2A	0.477329	0.0052022
GNB1L	0.316624	0.00335297		EPIPL	0.476294	0.00175284
THIK	0.316401	0.00275187		SMIM4	0.47607	0.0027975
RABP2	0.316345	0.0163029		NUFP1	0.475683	0.00207641
AN32E	0.313709	0.000860391		ACSF2	0.475552	0.00380911
PRAF3	0.313316	0.00260519		CDA7L	0.474995	0.0414945
ARY1	0.313093	0.00319039		TMUB1	0.474489	0.000360403
LTOR3	0.312944	0.00718639		DCAF7	0.473492	0.000337908
RO60	0.312342	0.000874523		ACATN	0.473452	0.00785105
IDHP	0.312103	0.00921106		SE1L3	0.47119	0.0203173
MRPP3	0.312027	0.00519537		LAMB1	0.470137	0.003331
FADD	0.311854	0.00192854		ERAP1	0.469194	0.0377783
HERC2	0.310783	0.000324488		TACD2	0.468985	0.000404569
ANLN	0.310297	0.0210945		ZDHC5	0.467598	0.0209175
VATC2	0.310149	0.000365489		ARRB2	0.466805	0.0034819
CENPF	0.30982	0.0289261		PDCD4	0.466682	0.000811627
PROF2	0.309667	0.033728		ZN346	0.46598	0.0446976
HLAH	0.309447	0.0143244		DGUOK	0.46507	0.00159008
WASC5	0.309395	0.000664936		AURKA	0.465006	0.0267171
GLO2	0.308159	0.00201862		OSBL2	0.464821	0.00795491
CEIP2	0.30812	0.000938294		TMEM9	0.464285	0.00615103
RMND1	0.307568	0.000769519		GPX8	0.463764	0.00267411
EF2KT	0.306666	0.00323034		ZDH20	0.463511	0.00294377
DHR11	0.30645	0.00225944		ANCHR	0.462893	0.0200345
TTC12	0.306031	0.0373813		ECI1	0.46185	0.000449778
NDUA6	0.305642	0.00202229		LYAG	0.461113	0.00178337
ACOC	0.304731	0.00185168		ZMYM2	0.460865	0.0347321
LTMD1	0.304414	0.00176758		IFIT3	0.460376	0.000149149
IF5A2	0.302716	0.00159034		KITH	0.459083	0.00556197
HLAC	0.302372	0.00158508		T106B	0.458759	0.00092948
CASP4	0.3015	0.0296055		UBP11	0.457872	0.00196883
CEP78	0.300743	0.0278735		GL8D1	0.457426	0.00570259
SDSL	0.300285	0.00102022		PRAG1	0.457263	0.000410059
GTPBA	0.299844	0.00761351		ELOF1	0.457143	0.0393164
FMNL2	0.299445	0.00274659		BDH2	0.457094	0.000227923
HYEP	0.299313	0.000250552		TPRKB	0.456646	0.00356199
ISOC2	0.298542	0.0374336		MPP5	0.455278	0.0138081
CS054	0.298244	0.0125949		ERCC2	0.455219	0.00395418
RAB4A	0.298235	0.00308878		CHMP5	0.454466	0.0064074
CATL1	0.29795	0.000238794		TM199	0.454279	0.011078
DUS1L	0.297034	0.00958976		FWCH2	0.453806	0.000639459
DX39A	0.297002	0.0089052		GOGA7	0.453591	0.00594312
NDUV1	0.296833	0.000852887		RBM23	0.452558	0.00341376
VRK1	0.296473	0.0272026		E41L2	0.451697	0.000734706
GELS	0.295845	0.00148714		VILI	0.451643	0.0262765
MCAT	0.295737	0.0125572		GRB10	0.450989	0.0230374
PDP1	0.295113	0.0216605		B3A2	0.450521	0.0102024
PAXI	0.295011	0.00678654		UBXN4	0.450169	0.00978525
CYTF	0.294731	0.00774518		TENS3	0.45011	0.00211268
BIN3	0.293916	0.00389561		FA83F	0.449954	0.00584793
DPP2	0.292591	0.00650881		EXOC6	0.44937	0.00820038
NPM	0.291956	0.0483224		CNKR1	0.449045	0.0149722
NISCH	0.290805	0.0315583		HLAC	0.448917	0.00130168
HDAC1	0.28961	0.00098697		MYH10	0.448389	0.00526753
SYJ2B	0.288699	0.0167201		NADC	0.446755	0.00584813
NDUS1	0.288586	0.00117608		PCM1	0.446482	0.00175444
T2FB	0.287974	0.0213988		MAP4	0.445498	0.0101939
AP1S1	0.287412	0.00110748		TM128	0.445011	0.00514967
MK03	0.287211	0.00947745		TBCD5	0.444506	0.00190552
L2GL1	0.286733	0.00236725		LICH	0.443694	0.00137471
MIC25	0.28651	0.0274786		DCAKD	0.443639	0.00216034
TAOK2	0.28592	0.00547404		CNPY3	0.443536	0.000226819
RP9	0.285608	0.000647682		ERBB2	0.442757	0.0028223
NDUV2	0.28525	0.000844385		TRI15	0.441612	0.0145833
CHDH	0.284367	0.000657243		K2C80	0.440025	0.00368228
BRK1	0.284346	0.00804557		MI4GD	0.438567	0.00795854
MED10	0.284009	0.0149137		HINT3	0.438466	0.000795031
PRR15	0.283391	0.00708207		HMMR	0.438037	0.000837548
ABRX2	0.281917	0.00634296		CCNA2	0.437587	0.00596977
SIAE	0.281369	0.0397407		TSN8	0.437412	0.00168976
PTER	0.281066	0.000918349		MBP	0.437134	0.0255772
XPF	0.28102	0.00165087		SYWC	0.436881	0.00319583
NBEL2	0.28066	0.00592537		RRAS	0.43591	0.00180677
GDPD3	0.280482	0.00153361		IFIH1	0.435222	0.000981781
QCR1	0.280418	0.00673774		UBTD2	0.434935	0.00272636
DOPD	0.27975	0.00120879		ANT3	0.434562	0.00223101
CK054	0.278747	0.00355075		MO4L1	0.431958	0.000684109
TRNT1	0.278445	0.0137933		CY24A	0.431851	0.0258643
SDHB	0.278059	0.0033258		INF2	0.431125	0.00207625
DEP1A	0.277455	0.0494884		GNL3L	0.430898	0.0243242
PT100	0.277345	0.0194306		MYOME	0.430116	0.0174352
PTPA	0.275817	0.00202642		CLD4	0.428686	0.00058624
CAB45	0.275318	0.0108412		MA2B1	0.428428	0.000753682
S35U4	0.275086	0.0258397		YIF1B	0.427767	0.0155244
HEXA	0.274102	0.00183281		TB10A	0.427711	0.0104935
PF21A	0.273486	0.00767529		TSN14	0.427343	0.00167414
FOCAD	0.273033	0.00361729		DJB14	0.427112	0.00596309
MTAP2	0.272868	0.0245096		CAPG	0.426956	0.00304493
GSTK1	0.272166	0.00287756		GGA1	0.426194	0.037563
PCP	0.271655	0.000863973		HINT2	0.424352	0.00136304
NDUS7	0.271151	0.00154842		ICMT	0.423738	0.00100821
WIPI3	0.270463	0.00220408		ZDH13	0.423736	0.0029428
DPOD1	0.269192	0.000644849		IREB2	0.422646	0.00219935
COX7B	0.268901	0.0253494		PDLI1	0.421948	0.00492384
HDDC2	0.268713	0.000903666		P85B	0.421688	0.00432818
PEF1	0.26758	0.0163362		SERB	0.421353	0.00227455
EOGT	0.267367	0.001464		RRBP1	0.421072	0.000570689
CX7A2	0.266909	0.00274078		ZN888	0.419983	0.0156308
LAMP2	0.266721	0.00787766		CRBN	0.419828	0.000912175
WRN	0.264955	0.00585762		MLF2	0.419644	0.00045374
PHF6	0.26492	0.00653		DDR1	0.41937	0.00248754
CPSF1	0.264757	0.00756817		FUT4	0.418283	0.024093
NDUS5	0.264026	0.00277782		SYBU	0.418118	0.00105636
TM258	0.264008	0.0222709		LIMC1	0.41793	0.0127236
CYTSB	0.263169	0.0109688		FRMD8	0.417789	0.01009
RAB2A	0.263109	0.00669673		MSH2	0.417467	0.00871675
MIRO2	-0.263302	0.0198016		DJC16	0.417455	0.026197
SRFB1	-0.263468	0.013275		COQ6	0.417042	0.0109457
UBXN1	-0.263693	0.000542284		TXN4B	0.416236	0.00207686
VRK2	-0.263722	0.00406727		PRR15	0.415845	0.0462522
MMSA	-0.263728	0.00281643		NRDE2	0.415262	0.0355967
TGT	-0.263845	0.00199118		DDAH2	0.414511	0.00371122
EIF3J	-0.263853	0.00365893		SNTB2	0.414054	0.0115102
MDR1	-0.263975	0.00358522		CC130	0.413553	0.0125672
PPOX	-0.26399	0.00597597		MA1B1	0.413064	0.00654391
PRI1	-0.264502	0.00861636		UIF	0.411576	0.00346625
BCCIP	-0.264616	0.00737299		ST14	0.411561	0.000638354
CD151	-0.264869	0.000987058		BUB1B	0.411461	0.00387757
MO4L2	-0.265408	0.0188072		ARFG3	0.411021	0.00169696
SUH	-0.265507	0.00115665		DHRS7	0.409849	0.000289196
NCLN	-0.265739	0.000727674		IL6RB	0.409815	0.0100731
CYTSA	-0.265892	0.00581585		BLVRB	0.409246	0.000763793
VIR	-0.266092	0.0179885		UBE2S	0.408998	0.00205714
ECHP	-0.266276	0.000688511		SYVN1	0.408513	0.000405399
CBPD	-0.266345	0.0461853		BBX	0.408357	0.00344458
ELOA1	-0.26647	0.0283083		PPB1	0.408034	0.0057653
VPS36	-0.266498	0.0119538		MICU2	0.407956	0.00172968
XPOT	-0.266608	0.00298061		NUCB1	0.407885	0.00234717
MTUS1	-0.267408	0.00122731		ALG9	0.407856	0.00372729
DHX33	-0.267664	0.00258244		FUCO	0.407679	0.00134842
DDX24	-0.268147	0.00434711		KCC2D	0.407527	0.000260748
CLPT1	-0.268203	0.00452215		LACTB	0.406736	0.00167072
HNRDL	-0.268218	0.00194873		DNJB4	0.405747	0.00182706
MY18A	-0.268308	0.00288489		CARL1	0.405681	0.00103457
TFP11	-0.269062	0.00838518		ARI3A	0.405206	0.00675559
PDE12	-0.269221	0.00264022		B3GN3	0.405191	0.00570574
MEMO1	-0.269239	0.00980204		USF1	0.405031	0.00683412
KAP3	-0.269328	0.0276953		FACR1	0.40435	0.0126658
PRC2A	-0.269748	0.00531182		KPCZ	0.404299	0.0180536
EXOS3	-0.270003	0.00450262		TLK1	0.403516	0.00189653
NUDT4	-0.270057	0.00163723		ITA3	0.402508	0.000460924
SZRD1	-0.270341	0.0204628		COX18	0.401933	0.0163831
ORNT1	-0.270463	0.00419041		2022-03-01	0.401523	0.0110718
SSNA1	-0.270557	0.00404516		ECH1	0.401486	0.000383986
NOP9	-0.270586	0.0234403		SYCM	0.401282	0.000708335
IF4H	-0.270656	0.00336711		MBOA5	0.401118	0.00733379
TIM	-0.270692	0.010226		DNJB6	0.401106	0.000918084
BL1S2	-0.271757	0.00261736		PTN3	0.399909	0.0085178
RENT2	-0.272003	0.00550315		GBG12	0.399907	0.00142549
EIF1A	-0.272305	0.0223837		M21D2	0.399717	0.0280581
BID	-0.272362	0.0023464		AP1M2	0.399074	0.00110747
TR112	-0.272512	0.00325735		IQGA3	0.398963	0.00202401
PLS1	-0.272905	0.00425246		EMAL2	0.398295	0.00252664
MOC2A	-0.274004	0.0376953		CYB5	0.398015	0.000531207
COA3	-0.274173	0.0067709		CE024	0.39733	0.00673255
EDEM3	-0.274202	0.00593198		SYVM	0.397295	0.00366011
DHX16	-0.274614	0.0356301		SERC1	0.395589	0.0053335
SNW1	-0.274819	0.00255066		RCAS1	0.395583	0.0250209
SMG8	-0.274935	0.0344492		PEPL1	0.395081	0.00744371
TF65	-0.274964	0.00606917		CENPU	0.394857	0.000884532
OTUD4	-0.275198	0.00760244		UBL5	0.394053	0.00345809
IP3KC	-0.275467	0.047072		CDK8	0.393901	0.00059103
DPOE3	-0.275598	0.0120662		RPC22	0.393741	0.0109128
WDR43	-0.275765	0.0327051		MAL2	0.393736	0.0116756
CK068	-0.276219	0.00156797		TRI27	0.393585	0.0264653
YIF1B	-0.276276	0.00603791		GFPT1	0.393428	0.00155493
SNF5	-0.276558	0.00668368		IRS1	0.393169	0.00936667
GRPE1	-0.276729	0.00252461		TPSN	0.393099	0.00142168
CDC37	-0.27707	0.010938		EPS15	0.39264	0.0023879
NDUAB	-0.277095	0.0189032		FBW1B	0.392151	0.00364541
KPCD	-0.277531	0.000564695		HMGCL	0.392093	0.000802365
FCF1	-0.277587	0.00137316		SYCC	0.392032	0.000315617
PP1R8	-0.27762	0.00809541		PCYXL	0.391218	0.0237828
C2AIL	-0.27771	0.0104857		PAPS2	0.390525	0.000587465
OPA1	-0.277874	0.00594533		DHR13	0.390324	0.00885546
SAMD9	-0.277891	0.000667376		MEAK7	0.390069	0.0498475
RBM12	-0.277944	0.000539755		NOL6	0.388772	0.00218054
CHSP1	-0.277975	0.00500597		MK03	0.388383	0.00318513
TKT	-0.278068	0.0099712		SDE2	0.38679	0.000716048
DIDO1	-0.278091	0.00308183		OASL	0.386516	0.00869767
CCD47	-0.278255	0.000977939		HELZ2	0.386395	0.0046932
RT18A	-0.278854	0.00515708		PLCC	0.386048	0.000682953
ICT1	-0.278936	0.00297343		SNX17	0.385759	0.00349255
YMEL1	-0.278994	0.00105326		SUN2	0.38524	0.00326907
CCD50	-0.278998	0.000845908		SP130	0.384189	0.00646712
RL24	-0.279042	0.00269154		TOR1B	0.384093	0.003522
RINI	-0.279366	0.00179519		SERPH	0.383901	0.000855629
ZN195	-0.279434	0.0211312		MOC2A	0.383839	0.0429724
MOCOS	-0.279711	0.0302221		PUS10	0.383378	0.0062745
ZO1	-0.280119	0.00142649		CR032	0.382797	0.0215693
RENR	-0.280354	0.00555185		PEPL	0.382782	0.0155755
T2FA	-0.280546	0.00145536		TM205	0.382501	0.000983926
MISP	-0.280572	0.00278765		LAMP2	0.381907	0.017836
RPC1	-0.280648	0.0112818		PLS3	0.381722	0.00815526
WBP4	-0.28112	0.00309754		MFF	0.381135	0.00638032
TSR1	-0.281206	0.00151408		PAPOG	0.379193	0.00218837
RT18B	-0.281224	0.000636545		SPNS1	0.378955	0.0085013
CHERP	-0.281368	0.00120277		SUMF2	0.378679	0.00111626
PACN3	-0.281454	0.00116057		CS054	0.378537	0.0355355
ODR4	-0.281543	0.000600544		MOB1B	0.378098	0.0010734
RANB9	-0.281562	0.00245092		ZC11A	0.377785	0.0460761
EEA1	-0.281824	0.000319058		NSE3	0.377245	0.000728048
LENG8	-0.282199	0.0484621		SATT	0.376792	0.000415481
CERT	-0.28245	0.000968356		RT36	0.376672	0.00421294
NUD19	-0.283476	0.0270028		SPAG1	0.37665	0.003254
AFAD	-0.28358	0.0082047		UGDH	0.376134	0.00103573
KNOP1	-0.283716	0.0172412		AGR2	0.375722	0.000956472
SMRC1	-0.283774	0.00181581		GP180	0.375693	0.0024123
BAG3	-0.283788	0.000670944		THYN1	0.375346	0.000880449
RRP15	-0.283964	0.0226859		CD63	0.374708	0.00856782
TPPC8	-0.284087	0.00106086		PPR21	0.374078	0.0122959
S10AA	-0.28473	0.000613995		INT4	0.373981	0.00882484
ADAS	-0.285405	0.000828087		GRL1A	0.373757	0.00407533
WDR46	-0.285517	0.000345158		CHM2A	0.373413	0.00137888
MAP2	-0.285832	0.00499484		CETN2	0.372709	0.0050221
MP2K3	-0.286367	0.0401157		ALAT2	0.37223	0.00398058
NCBP3	-0.286641	0.00668928		SBP1	0.371551	0.000736553
C1GLT	-0.286681	0.00369163		PHF23	0.371191	0.0029557
SHRM3	-0.287045	0.0275166		EPB41	0.371078	0.00114806
BT3L4	-0.287183	0.00174212		OCRL	0.370411	0.0432123
LEO1	-0.28724	0.0150525		NUMB	0.370156	0.00375516
NAT10	-0.287274	0.0022836		PIOS1	0.370093	0.0119561
METK2	-0.287328	0.00166033		SI1L2	0.369963	0.00343209
GAK	-0.287357	0.0146714		PNCB	0.368499	0.00082687
MPP10	-0.287431	0.00361468		INP4A	0.367155	0.00508031
FA8A1	-0.287588	0.00150783		SPIT1	0.366513	0.00110744
SH3B4	-0.287787	0.0224876		AFTIN	0.365787	0.00752616
SRA1	-0.287938	0.00124301		AT11B	0.365762	0.0185819
CBX5	-0.288019	0.00155215		ASM	0.365372	0.0138146
EIF1	-0.288132	0.00457635		UBXN8	0.364621	0.00857158
BMS1	-0.288176	0.000508223		CHSP1	0.364362	0.00714143
SERC1	-0.288257	0.00757232		ACSL1	0.364348	0.00430384
MBD2	-0.288377	0.00442327		S22AI	0.364012	0.00276189
UB2Q1	-0.288504	0.00262031		DONS	0.36391	0.0177337
CKP2L	-0.288506	0.00734578		SHRM3	0.363703	0.0164326
SDCB2	-0.288678	0.018231		ZKSC1	0.363505	0.0031336
AP1G2	-0.289177	0.00189696		ERG24	0.363403	0.0375496
NOG2	-0.289237	0.00429005		CR025	0.363283	0.0472869
TAF10	-0.289275	0.000990033		EM55	0.363192	0.0126089
RBM14	-0.289634	0.00115664		MGST2	0.362969	0.00152596
RIOX2	-0.289873	0.0143058		EMC7	0.36237	0.00715709
LUZP1	-0.289908	0.00379648		WDR54	0.36236	0.00507214
MPRIP	-0.289965	0.000985369		KLF16	0.36235	0.0203064
MBOA7	-0.29005	0.00214868		MAOX	0.362336	0.000907702
RANG	-0.290305	0.00259543		RRAGA	0.360973	0.0057085
BCD1	-0.290349	0.0383247		TGO1	0.360527	0.0137592
M4K4	-0.290458	0.000707175		KIF1C	0.360156	0.026217
RS20	-0.290642	0.00200943		S29A1	0.360109	0.0109655
STRN4	-0.290758	0.0145282		ARPIN	0.359556	0.00623157
HECD1	-0.290895	0.000453474		TRIM2	0.359437	0.0101444
DCAF1	-0.29108	0.00502587		SVIP	0.358883	0.0113909
RPAC1	-0.291889	0.00154474		SC23A	0.3588	0.00258036
RPTOR	-0.292103	0.00731397		RNF14	0.358605	0.0185003
AHNK	-0.292501	0.00196072		TECT3	0.35856	0.00332158
ABHD6	-0.293252	0.00486518		EXOC5	0.358239	0.00313023
Z280C	-0.293343	0.00051243		ITB1	0.357994	0.00213302
NUP35	-0.293649	0.000418338		THIM	0.357882	0.00257326
NIPBL	-0.293822	0.0141636		TM256	0.357588	0.00441199
UBAP2	-0.294015	0.00135802		PHAR4	0.357499	0.0443141
MED1	-0.294019	0.00454105		C2D1A	0.357477	0.015301
BRI3B	-0.294297	0.000835681		ADAM9	0.356843	0.0370188
KLK6	-0.294344	0.00327381		SNX30	0.356715	0.0125027
DDX31	-0.294365	0.0156967		GP107	0.356425	0.00354105
TYDP2	-0.294651	0.0361931		UFM1	0.35637	0.0100273
NUCB2	-0.294777	0.00896213		PDIA4	0.356249	0.00304816
NH2L1	-0.294821	0.000313525		JTB	0.355364	0.00206154
CBX3	-0.295133	0.000583589		EXC6B	0.354727	0.0133253
GOLM1	-0.295322	0.0320481		HBA	0.354719	0.00364963
CC137	-0.295397	0.0124386		HLAH	0.354461	0.0156587
AHNK2	-0.2956	0.00528386		RENR	0.354292	0.00628376
RM01	-0.295878	0.00351613		TMM51	0.352967	0.00441889
RAVR1	-0.295966	0.0244366		PYGB	0.352429	0.00478304
OASL	-0.296459	0.00105571		DSN1	0.351989	0.00284372
NADE	-0.29649	0.0050076		COMDA	0.351433	0.0068773
ENOG	-0.296624	0.0101584		T126B	0.350824	0.00526017
MEA1	-0.296704	0.031167		ZY11B	0.350611	0.00287298
RAPH1	-0.296922	0.0136245		SE1L1	0.350429	0.00174441
EPS15	-0.297069	0.00503559		GLCM	0.350327	0.000857521
EM55	-0.297393	0.0324037		TF3C1	0.350254	0.0334048
EIF3G	-0.297715	0.00231577		P4R3A	0.349853	0.00235361
CDC45	-0.298024	0.000439473		TBCB	0.348657	0.00101163
SPAG7	-0.298286	0.00112546		MBOA7	0.347951	0.00193014
HYOU1	-0.298784	0.000446881		DHB12	0.347879	0.00123613
LIMC1	-0.298927	0.0069942		SQSTM	0.346523	0.0106317
SF3B3	-0.298971	0.00119743		MGT5A	0.346434	0.0235677
AIF1L	-0.29956	0.024931		GANP	0.346087	0.0140073
ARBK1	-0.299576	0.00339216		TPD53	0.345914	0.00292315
JUPI2	-0.299752	0.00182159		STX12	0.345694	0.00227596
ERF1	-0.299931	0.000356837		BL1S3	0.345592	0.00413706
PARG	-0.3001	0.0199041		GOLM2	0.345106	0.00235404
CDK13	-0.300585	0.00241412		ISG15	0.345064	0.00263302
TNIK	-0.300596	0.000880169		KIF1B	0.344528	0.0168387
FOSL2	-0.30096	0.00430344		MMS22	0.34451	0.0189156
KI21A	-0.301112	0.010039		CTL1	0.343907	0.00184322
NUFP2	-0.301154	0.004329		MUTA	0.34324	0.00836361
CI114	-0.301235	0.00116859		KGUA	0.342985	0.00333292
MTHFS	-0.301366	0.0137242		CHID1	0.342762	0.0042564
F177A	-0.301828	0.0185596		COA3	0.342115	0.00430226
GPAT4	-0.30237	0.00114388		SMC1A	0.341913	0.00750595
AMERL	-0.302723	0.00190768		TIP	0.341773	0.0276761
VPS72	-0.303857	0.00424143		PHOCN	0.341708	0.0078374
AKAP8	-0.303919	0.00139138		DSC2	0.341561	0.00343342
WDR5	-0.303933	0.00162357		UBE2T	0.34028	0.00474876
ASML	-0.30402	0.000999454		GPT	0.340206	0.0210086
AKAP1	-0.304025	0.000825421		CLIC6	0.339371	0.0275929
ATX2	-0.304111	0.000695677		AT2C1	0.339075	0.00226973
RL13A	-0.304339	0.00356946		RAP2B	0.338743	0.0016916
MK08	-0.304341	0.0042321		NHLC3	0.338429	0.00776721
MECP2	-0.304423	0.00188586		DYLT3	0.338265	0.00374989
CCD86	-0.304559	0.000312192		ITB5	0.338108	0.00671848
ZFY16	-0.304826	0.00495395		CLIC4	0.337708	0.00502527
NEUL	-0.305454	0.00101586		LG3BP	0.337389	0.000665713
RBX1	-0.305904	0.00315514		PLOD2	0.337237	0.00362243
PRAF2	-0.305997	0.000914672		AT1B1	0.337213	0.00826517
MRM2	-0.306221	0.0113345		TYW5	0.337082	0.0219088
HIRP3	-0.306601	0.00186338		F16B1	0.336801	0.0113392
PP1RA	-0.306892	0.00143902		P2RX4	0.336702	0.00192558
PTPS	-0.306911	0.00232779		NIF3L	0.336673	0.00858829
PPIL4	-0.307013	0.000907528		KDM4B	0.33651	0.00814161
COPG1	-0.307091	0.00155728		ADA17	0.336149	0.0470377
UTP11	-0.307719	0.00557862		CAMLG	0.335121	0.00543932
CIP2A	-0.307771	0.00166243		VATC2	0.334743	0.00436381
RS6	-0.30786	0.000585861		DCTN6	0.334449	0.00286038
ESRP2	-0.308067	0.00184787		VAC14	0.334104	0.00756814
NU3M	-0.308149	0.0021945		FOLC	0.333662	0.00606335
THIO	-0.308763	0.00687962		RAB25	0.333338	0.00122594
EHBP1	-0.30922	0.00244859		HSPB1	0.333276	0.00536309
UBN2	-0.309623	0.00295883		ACAP2	0.333178	0.0109466
SMC4	-0.30963	0.00221673		BRCC3	0.332198	0.00252637
ASURF	-0.310038	0.0109341		RUFY2	0.331876	0.0441113
IPO7	-0.310319	0.000281108		ARBK1	0.331236	0.00491851
SFPQ	-0.310673	0.000454283		RSU1	0.331038	0.00624053
MANF	-0.310718	0.00823268		MICA2	0.33078	0.00122035
MILK1	-0.310754	0.00505719		RPC6	0.330485	0.0123263
SPT20	-0.310781	0.0103433		ZWINT	0.33033	0.0103371
P5CR3	-0.310912	0.00083855		CATIN	0.330261	0.0406484
DTWD1	-0.310935	0.0162724		STIM1	0.329871	0.0419548
ECD	-0.312035	0.0117589		RAPH1	0.329837	0.00944981
KRR1	-0.312547	0.000855172		VTI1A	0.329556	0.0229089
CLDN1	-0.312702	0.00416965		SYMC	0.328978	0.00370474
CSN8	-0.312726	0.00206677		NIT1	0.328839	0.00435999
MRP5	-0.312743	0.00340357		CALR	0.32879	0.00684534
DAPK3	-0.312909	0.00148761		AKP13	0.328708	0.0182638
LLR1	-0.312972	0.0127113		AMFR	0.328345	0.0227753
NSA2	-0.31321	0.00331845		GBG10	0.327938	0.00232693
M21D2	-0.3135	0.0183102		HDAC6	0.32754	0.00106432
SYRM	-0.313627	0.00153906		CD151	0.327138	0.00175154
AAMP	-0.313852	0.00526671		EXT2	0.327034	0.0018539
F207A	-0.313876	0.000322748		MEA1	0.326902	0.0425081
YLPM1	-0.314002	0.0292756		XRP2	0.326705	0.0014529
DDX20	-0.314405	0.0163807		DCNL3	0.326297	0.0262711
NOA1	-0.314531	0.001542		RHG35	0.326293	0.00376529
UBF1	-0.314736	0.00455509		DNJC1	0.325877	0.00951897
AKIP	-0.314876	0.0200177		ASSY	0.325869	0.00129343
BYST	-0.315003	0.000314033		SMC5	0.325159	0.00833728
RMD1	-0.315056	0.000580288		BL1S2	0.325057	0.00782691
ZCHC9	-0.31523	0.00669545		SH3L2	0.325055	0.0245779
SF3B2	-0.315649	0.000778207		SNP23	0.324993	0.00133074
TBCC	-0.315795	0.0133953		SATB2	0.324959	0.0177977
UPP1	-0.316144	0.00135311		BANP	0.324687	0.0144394
DCA13	-0.316367	0.00104744		GNS	0.324366	0.00173416
MIA2	-0.3164	0.00122175		KPCD	0.324044	0.00223043
LENG1	-0.316933	0.00229944		HYOU1	0.323677	0.00109651
CENPB	-0.317235	0.015924		SEC13	0.323628	0.0199673
PPM1G	-0.317508	0.00229517		HERC1	0.323162	0.00307314
AAK1	-0.317571	0.00218197		CGBP1	0.322686	0.0386955
YJ005	-0.317699	0.000432908		AGO1	0.322558	0.0105501
PPB1	-0.317763	0.000259495		BRD2	0.322165	0.0185524
GEMI4	-0.317912	0.000650604		LORF1	0.322122	0.0019293
UTP20	-0.317929	0.000707278		S35A2	0.321815	0.00792551
ALKB7	-0.318037	0.00833867		MKLN1	0.321652	0.019196
EHMT2	-0.318289	0.0236542		DECR2	0.320761	0.0465085
SELS	-0.318368	0.0160035		KXDL1	0.320551	0.0224578
BPL1	-0.31845	0.00128165		MCCA	0.320547	0.0320143
RL19	-0.318707	0.00112069		CK068	0.320076	0.0219074
CA050	-0.319173	0.00215265		SAHH3	0.319609	0.00226271
HOME3	-0.319268	0.0312649		NXP20	0.319166	0.00489689
VP37C	-0.319406	0.00917854		SH319	0.318959	0.0217193
CS047	-0.319669	0.00232911		VPS18	0.318666	0.00941925
CDK7	-0.319796	0.00059999		T106C	0.318219	0.0277148
MPP5	-0.319839	0.00029924		CASP7	0.317861	0.0104447
EHD4	-0.320127	0.000806023		VAT1	0.317853	0.00565486
TIPIN	-0.320306	0.00273316		CC186	0.317442	0.00533854
HIG1A	-0.320324	0.0481638		KIF3A	0.317422	0.0216615
MCM5	-0.320331	0.00116417		CDX2	0.3172	0.00149959
GORS2	-0.320542	0.000423987		LMF2	0.317017	0.0219692
SF3B5	-0.321203	0.0030118		BAP1	0.316904	0.00692811
RSBN1	-0.321209	0.0200571		GOLI4	0.316545	0.0142753
CWC25	-0.321305	0.00668054		NADE	0.315597	0.00186788
KTAP2	-0.321432	0.00541625		SC24D	0.314965	0.0113378
WLS	-0.321548	0.0107397		RN181	0.314686	0.00226609
ATX10	-0.32194	0.000440754		JAM1	0.314534	0.0204928
CAMP3	-0.322188	0.00992605		ZSWM8	0.314489	0.0295164
PTEN	-0.322437	0.00856715		C10	0.314029	0.0217893
EMC1	-0.322564	0.000364205		TPC2L	0.313953	0.0220959
CDCA5	-0.322669	0.0147728		AAK1	0.313836	0.0247042
KCTD3	-0.322721	0.0497492		E41L1	0.313797	0.00994614
SPRE	-0.323233	0.000336772		ORC6	0.313521	0.0177442
DCTN3	-0.323248	0.0096923		CHM4A	0.313486	0.0114181
HEAT1	-0.323532	0.00090187		TCAB1	0.313017	0.048011
TELO2	-0.324084	0.00331473		HYES	0.312787	0.00124115
DNMT1	-0.324539	0.00079682		TCAF1	0.312585	0.0188892
PDIA4	-0.324721	0.000703996		DRS7B	0.312408	0.00107201
H1X	-0.324782	0.00030044		SEN15	0.312384	0.0119203
RT63	-0.324886	0.00228212		MYH11	0.312286	0.00198104
K2C80	-0.324895	0.000291578		HOOK2	0.312035	0.00904856
ZN622	-0.325562	0.000821291		FUT8	0.311802	0.00688162
SMC5	-0.326237	0.000328843		GHDC	0.311568	0.00820401
RAD18	-0.3263	0.00917812		BACH1	0.311149	0.00990158
RHOF	-0.326376	0.00105047		DAPK3	0.31114	0.0195932
PRS4	-0.326525	0.000494821		STRP1	0.310921	0.0147725
IREB2	-0.326944	0.00232534		AL3A1	0.310817	0.00275432
K2013	-0.327118	0.00405513		SPD2B	0.309729	0.004988
GL8D1	-0.327477	0.0353924		NSMA	0.309716	0.00526123
BAG5	-0.327526	0.00158919		SORT	0.309702	0.0221193
EYA3	-0.327717	0.0302531		IMPA2	0.309683	0.0338798
CLD4	-0.328117	0.00191909		TLE1	0.3096	0.00307151
RRP8	-0.328378	0.0107961		RN170	0.309423	0.0032239
RPA1	-0.328773	0.00316946		ANM6	0.309106	0.0165933
RPB1	-0.328909	0.00084704		WBP2	0.308275	0.00266815
UAP1	-0.329593	0.00636889		MOCOS	0.307507	0.0430889
STIM2	-0.330412	0.0120157		ORC3	0.307374	0.0284133
EPMIP	-0.330564	0.00170001		UB2R2	0.30694	0.00792974
GRL1A	-0.330633	0.0018178		D39U1	0.306823	0.0441664
PHOCN	-0.330735	0.00143823		UBXN6	0.306672	0.040285
WDR1	-0.331546	0.000252768		F16P1	0.306052	0.00241417
SYMC	-0.331576	0.0027636		RBP1	0.304745	0.0283029
PEX13	-0.332028	0.00812498		MYO1C	0.304615	0.00982089
RTF2	-0.332195	0.00189699		NDRG1	0.304611	0.0334326
RHOU	-0.332461	0.000181449		S27A2	0.304592	0.00632089
SELB	-0.332545	0.00154038		K2013	0.304284	0.0125031
ECT2	-0.332728	0.000190247		IQGA2	0.30401	0.0317784
NPA1P	-0.333383	0.00137235		NDUF4	0.303877	0.0117557
FL2D	-0.333714	0.00477832		MSPD2	0.303061	0.0116101
RM50	-0.33378	0.000240609		F107B	0.302945	0.0126942
CATIN	-0.333908	0.0296999		FCHO2	0.302286	0.035249
SDF2L	-0.333996	0.00378215		MACOI	0.302181	0.0057214
BAZ1B	-0.33422	0.000250002		ATPMD	0.302171	0.017606
RM37	-0.335684	0.000955826		PLAK	0.302061	0.0153059
RPB9	-0.335794	0.0118017		LASP1	0.301867	0.013196
DAXX	-0.335859	0.0127124		MDR1	0.301661	0.0212799
DHX29	-0.336079	0.0025501		THA11	0.301482	0.0135442
MAK16	-0.336161	0.000697683		NUP42	0.301443	0.0124504
TBB2A	-0.336365	0.000523424		DERPC	0.300974	0.0172556
ASXL3	-0.336398	0.0374106		RB6I2	0.300903	0.00237628
GRB10	-0.33658	0.0153762		GON4L	0.300581	0.0348063
DNJA1	-0.336617	0.000284458		SNW1	0.300439	0.00458722
RS8	-0.336721	0.000430256		U119A	0.300217	0.00828747
PUS7L	-0.336722	0.00833408		PTTG	0.300165	0.0458644
ISY1	-0.337337	0.00542424		MTHSD	0.300118	0.0122975
COQ6	-0.3376	0.0361383		R3HD1	0.299605	0.0118373
BAD	-0.338085	0.00326297		PARP9	0.299398	0.015177
FUT8	-0.338119	0.0226752		RGPA1	0.299287	0.00595166
RPA43	-0.339393	0.002965		KPB1	0.299196	0.0190241
HIRA	-0.339714	0.00742127		FRIH	0.298825	0.00360083
RL12	-0.339803	0.000505321		SPHM	0.298356	0.00237458
IWS1	-0.340228	0.000383832		DTWD1	0.298079	0.03367
E2F4	-0.340486	0.00196618		GSKIP	0.297894	0.0215967
AP4B1	-0.34058	0.00231742		WBP11	0.297838	0.0166712
PAK6	-0.340671	0.00280332		ORML2	0.297319	0.0101852
TOM20	-0.340692	0.000608686		YETS2	0.297264	0.03676
LFA3	-0.340707	0.0258594		YJ005	0.296908	0.019418
DHYS	-0.341299	0.00057831		ABHD6	0.296496	0.0100752
DI3L2	-0.341422	0.041407		AF9	0.296455	0.030017
RAB3I	-0.341439	0.00464075		CDCP1	0.296157	0.0209877
ANCHR	-0.341701	0.00402787		WDFY1	0.29563	0.0028892
LAR4B	-0.342126	0.000730005		AMPD3	0.295578	0.0315791
P3C2B	-0.342474	0.0351029		EDF1	0.295249	0.0176282
HNRPD	-0.342555	0.000119066		PPCE	0.295114	0.00355483
SPNS1	-0.342665	0.0111962		CCNK	0.295009	0.0436315
BOP1	-0.342741	0.00191651		F120A	0.294323	0.012818
CF298	-0.34286	0.00270634		IRAK4	0.294217	0.0209377
P66B	-0.34335	0.00606021		UGGG1	0.29344	0.0117468
PAF15	-0.343588	0.0100942		RAB5B	0.293422	0.0126437
WDR33	-0.34403	0.00161563		RT4I1	0.293319	0.01169
PDCL3	-0.344584	0.00197301		NENF	0.293301	0.0404157
SNTB2	-0.34492	0.00191379		TCEA1	0.293164	0.0128574
RRP36	-0.345541	0.011282		CANT1	0.29314	0.00586879
SHOT1	-0.34616	0.000332001		G3ST2	0.293067	0.00716756
UBL7	-0.346316	0.0123847		TDRD7	0.292883	0.00518448
PP14B	-0.346749	0.00250294		ACO13	0.292672	0.00626774
RT11	-0.346755	0.000563956		HIP1R	0.292608	0.00923493
DPH2	-0.346834	0.000638618		CHK1	0.292544	0.0316923
UTP6	-0.346983	0.000144918		RNF31	0.292094	0.037607
CA122	-0.347181	0.00806314		BROX	0.291831	0.0101835
ABI2	-0.347717	0.0479879		ABHEB	0.29076	0.00226042
NJMU	-0.347973	0.00147491		BICD1	0.290514	0.030394
ZDH13	-0.348193	0.00173974		H1BP3	0.290124	0.00192703
BIEA	-0.348503	0.00461366		ADA10	0.289467	0.0201298
INT9	-0.349043	0.00823403		AL3A2	0.288999	0.0026728
UHRF1	-0.349699	0.000225838		AKA10	0.288519	0.00276653
PHF23	-0.349794	0.0024463		LMBL2	0.28836	0.0380775
DNJC7	-0.350345	0.000550317		STK38	0.287756	0.00530845
DDX18	-0.351006	0.000151449		TENS4	0.287679	0.0387613
KISHA	-0.351304	0.000313052		MPRIP	0.287182	0.00225987
SVIL	-0.35144	0.000922683		S12A8	0.286888	0.00570519
ARHG5	-0.351597	0.000106858		PP4R1	0.286812	0.00588328
FAKD5	-0.351911	0.00365002		DAG1	0.286681	0.00984413
RN149	-0.352638	0.000844105		SNX24	0.286372	0.00338277
FITM2	-0.352728	0.000143583		RALA	0.28602	0.0360172
MDEAS	-0.352731	0.00754662		SGSM2	0.285932	0.0126406
NSUN5	-0.353106	0.000613974		CENPH	0.285905	0.030834
DDX42	-0.353572	0.000548735		CASP	0.285788	0.00832304
B2L13	-0.353689	0.000575861		IF2B3	0.285752	0.0151622
UBP10	-0.354215	0.00106321		BRD3	0.285625	0.00320512
DDX21	-0.354722	0.000452547		BL1S1	0.28558	0.00651654
RN114	-0.354752	0.000537985		FBP1L	0.285546	0.0184341
DSG2	-0.354763	0.000250172		ECD	0.285246	0.0208109
RDH13	-0.354849	0.000492008		YBOX3	0.285179	0.00856862
NFIP2	-0.355233	0.00463149		GNAI3	0.284661	0.0307058
YRDC	-0.355575	0.000846513		P4K2A	0.284487	0.00653566
CBP	-0.35676	0.00065906		PTGES	0.28447	0.00772067
TTK	-0.357359	0.031359		SO4A1	0.284385	0.0219744
RBM26	-0.357498	0.00166199		SIAS	0.283611	0.0161849
NUP93	-0.357585	0.00105891		DECR	0.283526	0.021836
TSSC4	-0.357801	0.00105735		ANO10	0.283392	0.00830206
G3ST2	-0.35828	0.00489458		PAAF1	0.283223	0.00727418
F120A	-0.358399	0.00118729		TRXR1	0.282802	0.00487858
TRXR1	-0.35877	0.000822459		ITSN2	0.282654	0.0166385
NCDN	-0.359045	0.00252384		SP3	0.282624	0.00883605
YBOX1	-0.359674	0.000762677		DCA11	0.282251	0.0139548
THIM	-0.360448	9.31289e-05		STIM2	0.281802	0.0233271
DP13A	-0.360778	0.00141618		VPS36	0.281584	0.0247973
VP37B	-0.361114	0.00381439		ROMO1	0.281311	0.0325614
AHSA1	-0.361127	0.000459711		AR2BP	0.281135	0.0414621
TMX2	-0.361443	0.000291281		SRXN1	0.280717	0.0138542
CCD12	-0.36209	0.00122536		SERC	0.280415	0.0156607
DDX3Y	-0.362908	0.00255887		RN214	0.280276	0.0147303
GCH1	-0.36348	0.000236758		CSRP1	0.280134	0.00329537
AR2BP	-0.364932	0.0055503		NU4M	0.279867	0.022384
RSRC1	-0.365237	0.000435571		PHC2	0.279836	0.00726271
FUCT1	-0.365277	0.00990746		PLPP3	0.279029	0.0161856
NUDC	-0.365296	0.000944811		STX7	0.278299	0.00817594
GEPH	-0.365364	0.00132086		CAP2	0.278296	0.0326221
APTX	-0.3658	0.0208319		MECR	0.278296	0.03662
KDM2A	-0.366081	0.00231682		PO210	0.278188	0.00379439
NUD16	-0.366649	0.00161263		GNA12	0.278166	0.0359785
RL7A	-0.367046	0.000160216		RAB8B	0.277907	0.0201521
UBR2	-0.367169	0.0499863		ZNT1	0.277867	0.00296447
IN80C	-0.367811	0.00526295		TAP2	0.277678	0.0142825
MRM3	-0.367866	0.000269376		RISC	0.277614	0.00589076
FARP2	-0.36787	0.00156847		PPCEL	0.277525	0.00794405
RPC4	-0.368968	0.00215122		PNKD	0.277412	0.0323381
PCBP2	-0.369173	0.0002982		SLBP	0.276954	0.0131452
ZN362	-0.369193	0.0214716		BCKD	0.276899	0.0117316
ZNT7	-0.369313	0.000284596		HERC5	0.276845	0.0149601
SH319	-0.369428	0.00854793		LIMA1	0.276633	0.00352749
PLEC	-0.370101	0.000188264		PEA15	0.276514	0.00887419
RBM4	-0.370256	0.00120095		ZN687	0.275699	0.0153411
ESF1	-0.370571	0.00295323		NDK3	0.275573	0.0102217
ITM2C	-0.370755	0.00634187		PTPS	0.275167	0.0103966
NEPRO	-0.370929	0.000442469		RAB13	0.27506	0.0060747
RL17	-0.37111	0.000249571		NEDD1	0.27468	0.0396181
LSM12	-0.371666	0.00733497		CHP1	0.274221	0.00502684
BET1L	-0.372032	0.0146148		SFSWA	0.273636	0.0348038
TIM21	-0.372204	0.000246455		TP53B	0.273364	0.0116141
SHPK	-0.372215	0.000164439		ARI4B	0.273249	0.0298953
RRP7A	-0.372893	0.00107652		QPCTL	0.273176	0.00429024
UFM1	-0.374887	0.000664967		PLCD3	0.273164	0.0247397
SDC4	-0.375283	0.00124033		GNA11	0.27306	0.00499096
ACTN1	-0.376665	0.000100908		FA50B	0.272965	0.011619
TDRD7	-0.37686	0.00230377		APC	0.272859	0.0237684
SGF29	-0.376918	0.00265936		MYDGF	0.272813	0.0199282
RIOK1	-0.377031	6.95016e-05		SHOT1	0.272642	0.0145993
SMC1A	-0.377304	0.00109877		MPRI	0.272347	0.00654551
SP1	-0.377407	0.000265761		PI42A	0.272249	0.0412635
INT3	-0.377628	0.00703423		PXL2B	0.272143	0.00881735
CYTB	-0.378056	0.00888785		5NTD	0.272108	0.0480523
CRIPT	-0.378165	0.00055154		MPP7	0.272061	0.0166195
CYTC	-0.379464	0.00132013		HAT1	0.271988	0.00896602
HELZ2	-0.379542	0.00349864		B4GT1	0.271973	0.00381104
CHD7	-0.380427	0.00299229		S35F6	0.271305	0.0450265
S29A1	-0.382234	0.000996707		SESN2	0.270692	0.0156502
GSH0	-0.382249	0.00012694		SMRC2	0.27066	0.0165467
THOC7	-0.38256	0.000272911		NEUA	0.270286	0.0424869
UTP15	-0.383112	0.000696636		ACO11	0.270259	0.00739986
PHC3	-0.384841	0.0150857		COT2	0.269869	0.0109303
MORC3	-0.385001	0.00100725		SH3B4	0.269773	0.0272794
ZCCHV	-0.38515	7.30438e-05		L2GL2	0.269513	0.00562049
CCNB2	-0.385457	0.0269306		ZCCHV	0.269014	0.0300426
IRAK4	-0.385495	0.0128926		DTD1	0.268666	0.00422146
DNLI1	-0.385929	0.0052632		GSE1	0.268291	0.0360628
TFDP1	-0.386142	0.00414954		I2BP2	0.268202	0.00747545
GOLP3	-0.386577	0.000531401		SMC6	0.267995	0.026562
DECR2	-0.386802	0.0368141		INT9	0.267261	0.0197658
PP4R1	-0.387695	0.0022334		WDR89	0.267259	0.00977611
PLPP3	-0.387866	0.0158463		TNK1	0.267239	0.0417508
SYVN1	-0.388759	0.000627846		PAPS1	0.266997	0.0258952
RPF1	-0.38879	0.000398624		LPCT4	0.266726	0.0340456
STML2	-0.388881	0.000281275		PHLA2	0.266451	0.0273063
PYRD1	-0.389372	0.00220307		KTI12	0.266318	0.0403873
VPP1	-0.389461	0.000219723		DC1L2	0.266243	0.0130854
KC1E	-0.389575	0.0229647		TACC2	0.266066	0.0180425
MT2	-0.390102	0.00900913		BMP2K	0.265747	0.0328371
TISB	-0.390593	0.00175018		BLM	0.265498	0.0138463
P4HTM	-0.391392	0.00433669		PYGL	0.265378	0.00541202
ZN768	-0.391618	0.000657019		CERT	0.265276	0.0078582
NDUC1	-0.391746	0.0495391		PLP2	0.264821	0.013012
DDX10	-0.391955	0.000117883		OGT1	0.26476	0.0208911
ZFR	-0.392286	0.0016275		ANXA4	0.264752	0.0141087
PSMF1	-0.392589	0.00144765		HIRP3	0.264515	0.0110639
UIMC1	-0.392852	0.0125468		WDR33	0.264483	0.0222691
RECQ4	-0.392993	0.0037403		CD166	0.264455	0.0155453
LRC57	-0.393154	0.000641753		THTPA	0.264294	0.0333602
HMGA1	-0.393179	0.000155035		ARHG5	0.263868	0.00935437
RUFY2	-0.393533	0.00433456		PYRD1	0.263713	0.0112225
YIF1A	-0.393603	0.00162511		CFDP1	0.263434	0.0376491
SP3	-0.393814	0.000219758		ARK72	0.263426	0.00582158
P4R3A	-0.393928	0.00337831		DPOE4	-0.26694	0.00717924
NCAS2	-0.394157	0.0457008		ABC3B	-0.267868	0.021625
HMGA2	-0.394722	0.000434752		TAGL2	-0.268382	0.00250579
MYADM	-0.395265	0.000186072		TIM8B	-0.27057	0.00252572
DUS11	-0.395497	0.0250217		POP1	-0.270901	0.00253343
RHG17	-0.395855	0.0180105		RL18	-0.271901	0.0108577
H14	-0.396274	0.00106393		CATL1	-0.272055	0.0246715
ENL	-0.396941	0.00141189		K2C6B	-0.275733	0.0288316
COT2	-0.397056	6.08755e-05		TOM5	-0.277848	0.00724509
EIF3H	-0.397661	8.78832e-05		RL13	-0.277942	0.0155312
CXA8	-0.398201	0.0116118		IPO4	-0.277962	0.0148349
BICD1	-0.398481	0.00385981		PTPM1	-0.278575	0.00937828
MED13	-0.398871	0.0262417		FABP5	-0.279551	0.00516425
DAF	-0.400518	0.00396912		MA2C1	-0.280072	0.0349726
NAA40	-0.400602	8.13723e-05		CUL5	-0.281837	0.00305068
EPHX4	-0.400896	0.0176335		S66A2	-0.282653	0.0125671
RL18A	-0.401172	0.000575043		FBX30	-0.284566	0.0207162
DCP1A	-0.401636	0.0042465		T22D2	-0.285069	0.0312289
TRIP6	-0.401652	0.00734259		RS18	-0.285558	0.00488409
TF3C1	-0.401908	0.0103396		LLPH	-0.288306	0.0147278
CLPB	-0.402046	0.000529431		CDC45	-0.288413	0.00160148
CHD1	-0.402206	0.00201744		ARMT1	-0.288972	0.0337413
AGFG1	-0.40249	0.000295096		THG1	-0.291982	0.00480869
UBP36	-0.40255	0.0107011		RS23	-0.292815	0.00228657
RM11	-0.402732	0.000882135		RL6	-0.293128	0.00248312
ZNT1	-0.402792	7.91766e-05		DOHH	-0.29359	0.00715039
HBA	-0.403104	0.00264882		THADA	-0.294122	0.0120533
ZN687	-0.403278	0.00287326		EFHD2	-0.294302	0.0204772
PP2BC	-0.403787	0.00561015		IF4A2	-0.297715	0.0067219
SHQ1	-0.403926	0.00611578		LDHA	-0.30552	0.00196313
PRC2C	-0.404061	7.42434e-05		DAAF5	-0.306504	0.00819054
LASP1	-0.404668	0.00101796		MRPP3	-0.308187	0.0131618
CCNC	-0.405398	0.0473697		IFT25	-0.309707	0.015672
TNPO2	-0.40659	6.53119e-05		ATOX1	-0.310101	0.00463669
PACS1	-0.4075	0.000156086		RL1D1	-0.310203	0.00175046
MMGT1	-0.40829	0.0157782		RL4	-0.311183	0.00969681
ANKMT	-0.408462	0.0194016		CATC	-0.311721	0.0024322
NUP42	-0.409266	0.00260632		NIP7	-0.311823	0.00852664
CO9	-0.409439	0.0452821		JUND	-0.312851	0.0293476
SNIP1	-0.409739	0.00037434		SYMM	-0.315348	0.0116714
EIF3K	-0.409778	0.000266036		SRSF4	-0.31542	0.00229956
ABCBA	-0.409971	0.0124189		TYW4	-0.318175	0.00187971
PRP4	-0.410386	3.54549e-05		T22D1	-0.31823	0.00204774
TPRN	-0.411468	0.00322927		DEP1A	-0.320317	0.0369694
MKLN1	-0.411512	0.002902		LYRM2	-0.322877	0.00435916
PERP	-0.411976	0.00645893		H10	-0.329364	0.0426477
TAOK1	-0.412459	0.00767546		SPEE	-0.329997	0.00282423
EXOSX	-0.412731	0.000518525		S10A6	-0.33082	0.00218551
MED25	-0.413158	0.00483496		RS30	-0.331117	0.00396638
TLK1	-0.413293	0.00121021		RM12	-0.335321	0.00908047
PDLI1	-0.413397	0.00177151		RBFA	-0.335331	0.00489655
UBXN8	-0.413772	0.00152621		RN185	-0.336105	0.0415017
CREL2	-0.41379	0.00216966		SBNO1	-0.340035	0.0173199
UB2R2	-0.414556	0.0014187		MALT1	-0.3503	0.00566937
SEC13	-0.415555	0.000193779		MANS4	-0.35178	0.0146397
CCNK	-0.415777	0.0303283		SUMO2	-0.352175	0.0206036
FACR1	-0.416034	0.00196858		APLF	-0.352956	0.0137935
ZY11B	-0.416343	0.0395006		WDR11	-0.357896	0.032701
SP100	-0.41763	0.00371442		CL16A	-0.3591	0.0015369
CCYL1	-0.417915	0.000716666		TGFB1	-0.359123	0.0362109
BRD4	-0.417963	0.00231824		ARMC5	-0.361495	0.00731857
NLE1	-0.418718	0.000379779		GSDMA	-0.36157	0.00412698
NPRL3	-0.419253	0.0259876		LC7L3	-0.366042	0.0377456
LAD1	-0.420649	0.000188457		CND2	-0.366518	0.00677346
CCDC9	-0.420722	0.000509946		MAPK3	-0.370367	0.0379423
C56D2	-0.421231	0.00588074		MADD	-0.371118	0.0176189
I2BP1	-0.421853	0.00303779		TRFE	-0.371898	0.0158863
CHK1	-0.422199	0.0313725		FA83G	-0.372271	0.00926048
QTRT2	-0.422313	0.00457645		OTU1	-0.373787	0.00904211
DCAM	-0.422667	0.0200317		IFRD2	-0.375654	0.0445385
IMPCT	-0.423502	0.00994739		TAM41	-0.37672	0.00995823
BCL9L	-0.424303	0.00123949		VWA7	-0.382628	0.0497524
DDX58	-0.424338	0.000171573		LTO1	-0.383677	0.0264847
RSBNL	-0.424663	0.00293223		PMS1	-0.391084	0.0174946
MAFG	-0.424768	0.00288529		C11B2	-0.395813	0.0172996
RRP1	-0.424841	0.000552156		PTK7	-0.397483	0.0109867
RL22L	-0.424929	0.000112477		NPM	-0.401658	0.0209443
ZN624	-0.425014	0.0444427		SYTL2	-0.409918	0.000465363
DJC13	-0.426254	0.0363205		ADCY4	-0.413098	0.0231047
SYAP1	-0.426663	0.00144381		RS10	-0.415188	0.00934873
COF2	-0.426832	0.000394282		ACOD	-0.428566	0.00221308
ATG4B	-0.427558	0.000627024		AREG	-0.462447	0.00352375
PHAX	-0.427887	0.000143704		EF2KT	-0.469861	0.000428319
S39A7	-0.428075	0.00407022		AGAL	-0.47218	0.00181841
MYOF	-0.428649	0.00034277		K0754	-0.474639	0.00115509
PUS10	-0.428944	0.0154519		TRY2	-0.482497	0.016823
RT36	-0.430016	0.000895319		PREP	-0.488898	0.00122313
HSF1	-0.430293	0.000321951		RABP2	-0.507654	0.000523507
RMD5A	-0.430984	0.00103996		S14L2	-0.511798	0.0164343
RIF1	-0.431706	0.000507633		BRAF	-0.51302	0.00411482
NCOA7	-0.432526	0.00553843		ATRX	-0.52773	0.0173629
GOGA4	-0.432706	0.00101311		UTP23	-0.533428	0.0372033
KAT7	-0.43326	0.000731021		RL37	-0.538716	0.000422494
PURA2	-0.433571	0.000100325		GLMN	-0.539435	0.000989049
GEMI5	-0.433757	0.000226018		ARGI2	-0.548331	0.00248252
CALR	-0.433799	0.00109835		WDR83	-0.55832	0.00275427
DIAP3	-0.433807	0.0249893		PNISR	-0.563977	0.000760977
ZN511	-0.433916	0.00211942		S10A4	-0.571153	0.000153827
CTL2	-0.434193	0.00734219		Z3H7B	-0.599157	0.0165592
GON4L	-0.434308	0.000162383		ACK1	-0.630605	0.00036133
SPIT2	-0.434341	0.000314471		DCD	-0.638219	0.0144247
SSF1	-0.435234	0.000431885		RIC8B	-0.638579	0.000308751
ORC6	-0.435366	0.00138001		TBB3	-0.676581	0.0476985
RBM19	-0.435536	7.02037e-05		BCL10	-0.681579	0.00832367
SH23A	-0.435845	0.0286831		FP100	-0.765292	0.0136639
ELF1	-0.435922	0.000489564		GCP2	-0.794135	0.000354942
RPA2	-0.43894	0.00551862		NU133	-0.814234	0.044506
EPN4	-0.439743	0.000124696		MET7A	-0.843759	0.0229864
MED21	-0.439798	0.00830248		AOFB	-0.923633	1.32811e-05
LRP10	-0.439889	0.00175135		MKRN2	-0.981039	0.00328095
TAP26	-0.440017	0.00310196		AASD1	-1.00439	0.000131727
CHD8	-0.441758	0.000508642		MTND	-1.03731	4.27983e-05
MP3B2	-0.442787	0.0011948		VWA3B	-1.09456	0.00853559
IFT20	-0.443842	0.0361543		TBAL3	-1.48039	0.0174019
GGA1	-0.444102	0.0354636		EPG5	-1.80813	0.0457997
RPC22	-0.444364	0.0436108		H90B4	-2.03882	0.00968855
UB2E1	-0.445036	2.29509e-05		ELP5	-2.18659	1.49061e-06
HEXI1	-0.448305	0.000292728
DJB14	-0.448574	0.00147842
ZN787	-0.448745	0.00327066
LFG3	-0.448787	0.00678404
GTPB6	-0.449006	0.00517047
TRBP2	-0.449102	0.00104464
GCP6	-0.449199	0.00156102
ZN668	-0.449611	0.0010972
LERL1	-0.449986	0.00191992
RSU1	-0.450351	6.20451e-05
TSR3	-0.450565	0.00661243
DDX28	-0.450941	0.00135846
SURF2	-0.452359	0.00474905
TPPC5	-0.452431	0.000113213
ZN888	-0.4525	0.00229589
TFR1	-0.452531	0.00056945
PDLI5	-0.452667	0.00120581
BIP	-0.453204	6.173e-05
DGLB	-0.453375	0.00014345
UB2E3	-0.453825	0.00371288
LMO7	-0.455319	0.00023564
DNJC3	-0.4563	0.000455862
MYDGF	-0.456728	6.87875e-05
TSN15	-0.456818	0.00498782
DPOLA	-0.456845	0.00012842
TCAB1	-0.457246	0.00975773
RBM28	-0.458443	0.000210404
LORF1	-0.458915	0.000198186
PELP1	-0.459733	4.47155e-05
PCM1	-0.460918	0.00162496
OCLN	-0.461018	0.00042177
EPS8	-0.462261	0.0014473
KIF1B	-0.463869	0.00174091
LARP4	-0.466006	4.96738e-05
OS9	-0.467618	0.00266313
ZFY	-0.468674	0.00130957
AMFR	-0.469465	0.00132793
BCS1	-0.469962	0.0277802
FRK	-0.470141	0.000449964
CENPV	-0.470903	0.000420693
COBL	-0.471002	0.000304981
RFIP5	-0.471454	0.00246956
HXA13	-0.472065	0.00529537
CEP55	-0.472727	0.00713521
CENPC	-0.472999	0.0313868
ZDHC5	-0.473636	0.0296437
CTDP1	-0.474614	0.00021149
BACD3	-0.475396	0.00793258
ZSWM8	-0.476672	0.000673134
LDLR	-0.476851	0.000129464
GALT1	-0.47773	4.70427e-05
FARP1	-0.477773	0.00444813
GULP1	-0.478481	0.00919038
RRP12	-0.478516	0.0345053
WIPI4	-0.47896	0.00358721
WDR4	-0.479378	0.00125763
MRTFB	-0.479608	0.00152465
FUT4	-0.480326	0.00236468
MA1A2	-0.480518	0.000801435
CC115	-0.480832	0.00329549
ORC1	-0.481149	0.000817791
HS71A	-0.4816	0.00107051
RM15	-0.482723	0.0406194
HDHD1	-0.482865	0.000993643
NGDN	-0.482885	4.12415e-05
RASA2	-0.483328	0.0360364
TIF1B	-0.485622	0.000141192
PHRF1	-0.48576	0.00206919
DPOA2	-0.486597	0.000369637
NAA15	-0.488244	0.000116244
CHUR	-0.489528	0.00282629
CHMP5	-0.489633	0.000266451
INT4	-0.490128	0.00243365
MA1A1	-0.490591	0.00144246
VINEX	-0.491028	0.00134249
PIOS1	-0.491686	0.0116883
CAVN1	-0.492864	0.04922
FXL12	-0.492956	0.0257715
TXLNA	-0.494389	2.46192e-05
MTA2	-0.494571	0.007043
RM54	-0.494777	0.00626824
STXB5	-0.494778	0.00544114
SI1L1	-0.495056	0.0127507
JMY	-0.496136	0.00506467
ITPK1	-0.499027	0.000605861
RPC8	-0.501737	0.00198118
FBXL6	-0.501976	0.00673402
BMI1	-0.502005	0.00385628
STEA3	-0.503954	0.000116657
STPAP	-0.504172	0.00259692
AMPD3	-0.50589	0.00158186
WDR48	-0.506666	0.00406053
FXYD3	-0.50725	0.000466045
RELB	-0.508724	0.000291856
CDCA3	-0.509752	0.0110789
MARCS	-0.510694	5.28439e-05
NCOA6	-0.511437	0.00553786
CENPM	-0.51167	4.00591e-05
ZC11A	-0.511986	0.0178739
METH	-0.513041	0.00286426
GP180	-0.514503	1.64191e-05
APC	-0.514561	0.0212356
RNBP6	-0.515608	0.00380994
ALR	-0.516023	0.00487398
ITB5	-0.516122	0.00141957
ZMAT2	-0.516978	3.89979e-05
CACO2	-0.517307	0.00123549
DJC16	-0.517401	0.0321333
BCAR1	-0.519446	3.55111e-05
DAG1	-0.520525	0.00109896
RFX1	-0.520852	0.00442804
POMP	-0.522292	0.00783493
CDK6	-0.523356	0.00020845
AQR	-0.524448	0.00146164
SEN54	-0.525438	0.00163664
EHMT1	-0.526989	4.54229e-05
HS105	-0.527493	5.53249e-05
TRI15	-0.527778	0.001066
ID1	-0.528112	0.00314438
LPP	-0.533299	0.000465617
MGAT1	-0.533846	0.00047399
TBCB	-0.53542	1.32289e-05
JTB	-0.536495	7.09231e-05
IGSF3	-0.536547	0.0121719
OGFR	-0.537477	0.000392584
ANR17	-0.537877	5.11941e-05
ZN277	-0.538002	0.00230728
NVL	-0.539054	0.00587075
CATZ	-0.540257	0.000620284
LIMD1	-0.540778	0.00131466
TULP3	-0.541626	0.027955
RS15	-0.542818	0.00105387
KLF16	-0.542938	4.10347e-05
UBP3	-0.545668	0.000371128
DNJC1	-0.548535	0.000439507
CRLF3	-0.549577	4.25272e-05
CIZ1	-0.550347	0.000474643
CLIC6	-0.552709	0.00918326
SHCAF	-0.552954	0.0429026
ARFG1	-0.553156	0.00015742
NSE3	-0.553557	2.51899e-05
ZDH20	-0.556397	0.00129447
TYB10	-0.557011	0.000745306
SFSWA	-0.55759	0.00779223
ZCH18	-0.558674	0.0110323
IPO4	-0.559522	4.99035e-05
H15	-0.560556	0.000109411
UBE2S	-0.560585	3.6839e-05
F107B	-0.561256	0.00117099
TMUB1	-0.56186	1.64487e-05
MED8	-0.562789	0.00588851
CC130	-0.567526	0.00618135
YJU2	-0.572903	4.66715e-05
SMRD1	-0.573043	0.000360342
M17L2	-0.575508	9.77929e-05
JOS1	-0.581445	0.00621861
DJB12	-0.582384	8.68404e-06
CXAR	-0.582547	3.08776e-05
DERPC	-0.584883	0.000501679
MAFF	-0.585586	6.83659e-05
DGUOK	-0.587869	0.0237134
RUSD2	-0.588017	0.00067884
TFB2M	-0.588872	0.000413229
TENS3	-0.58918	1.41001e-05
ZAP70	-0.589206	0.00289151
TTF1	-0.589454	0.0468296
CEP41	-0.590676	0.000715662
AAKB2	-0.591903	0.00062662
ACS2L	-0.591996	0.00798256
MGST2	-0.592771	0.000156486
CRBG2	-0.59374	3.14867e-05
MLKL	-0.59481	0.00039394
GNL3L	-0.595364	8.19509e-06
POTE1	-0.595516	0.00836955
MTCL1	-0.59983	3.25699e-05
ZN363	-0.599836	0.00075078
NAF1	-0.602351	0.000459321
UBP4	-0.602816	0.0163499
M4K3	-0.604144	0.00588351
RHG08	-0.604244	0.00166683
AF9	-0.604639	0.000468205
ZN852	-0.604645	0.00464034
RAD51	-0.606419	0.00634332
MT21D	-0.608698	0.0224572
CEBPB	-0.608818	0.00214645
CBX2	-0.609085	0.00209549
TMM59	-0.611563	0.00526005
TPRKB	-0.613171	0.000510116
PLP2	-0.614912	0.000151878
MTMR3	-0.616998	0.020056
SP130	-0.617169	0.00339202
SEN15	-0.617224	0.000229502
MEAK7	-0.618111	0.00721354
S35A2	-0.625198	0.000213276
UGDH	-0.627562	1.17321e-05
ERRFI	-0.627781	0.00297487
TR10A	-0.629863	0.00247899
CR025	-0.634179	0.0453866
RAF1	-0.63486	0.00715432
HNRPC	-0.636464	0.0245456
ARI3A	-0.636974	0.000182943
APOA1	-0.64091	1.18115e-05
QCR6	-0.64365	0.0296503
E41L1	-0.647954	0.000274207
DMAP1	-0.651974	0.0454387
STBD1	-0.652242	4.6674e-05
ZFAN1	-0.653398	0.00058459
DHX37	-0.65606	0.0112865
TM50A	-0.656634	0.00884052
SO4A1	-0.657352	0.00246216
MET2B	-0.65953	0.00338669
SPEB	-0.661814	0.00307455
P66A	-0.662698	0.000162059
CDK8	-0.663399	8.70547e-06
TRI59	-0.665369	0.0117152
SPT2	-0.668112	0.000194454
ATAD2	-0.673173	0.000395324
TACD2	-0.673259	2.66578e-05
NUFP1	-0.675881	0.00012518
XXLT1	-0.680144	0.00578672
B3A2	-0.683659	1.12414e-05
SATB2	-0.684359	0.0297274
PIN1	-0.686047	0.0131886
NDUF4	-0.686056	0.000397999
GPTC4	-0.687807	0.000367299
SPS2L	-0.689867	1.24261e-05
PGH2	-0.690216	1.22815e-05
ZBT7A	-0.693015	0.0208285
CA052	-0.693737	0.00110788
T4S1	-0.693786	0.000420123
MF14B	-0.694943	2.00991e-05
IL6RB	-0.696048	0.000355656
GOSR2	-0.69771	3.26982e-05
TMM18	-0.698468	0.00148365
FPGT	-0.698675	0.00324658
GTR1	-0.699977	4.06951e-06
E41L5	-0.700299	8.49628e-05
SENP2	-0.700955	0.00556124
IFRD1	-0.703348	0.00221277
SC5A3	-0.704474	0.00137155
RAI3	-0.707938	1.43476e-05
ANM7	-0.715186	0.0344765
SVIP	-0.715927	6.13406e-06
TLCD1	-0.718923	0.0365182
FA83F	-0.719834	0.00087452
GEMI2	-0.722614	0.00490077
FETUA	-0.732493	0.00091795
TDG	-0.733904	0.00764997
P20D2	-0.740045	1.48904e-05
EREG	-0.740597	4.51649e-05
TNR6A	-0.745159	0.0172209
SIM13	-0.748075	0.004663
HIG2A	-0.7525	0.000893907
ALBU	-0.75927	0.000668898
SQSTM	-0.759359	1.31089e-05
COPB	-0.759447	0.00552864
RHOB	-0.760589	0.000661271
H12	-0.760649	0.000431335
AGRIN	-0.763482	0.0061811
CY24A	-0.766131	0.00157963
ERD21	-0.775546	0.000398821
ZNF3	-0.775825	0.000793868
BIRC3	-0.778056	0.000785474
GSTM4	-0.786564	4.29202e-05
SPT5H	-0.787539	0.00207261
YBOX3	-0.788853	3.05305e-06
FKBP4	-0.793641	0.0130152
GNPAT	-0.79835	0.00803774
TRM13	-0.80241	0.000563119
ICLN	-0.809225	0.0388345
LRP8	-0.81053	0.032754
QSER1	-0.811682	0.000856232
EMC9	-0.817068	0.00021104
TRM7	-0.818835	3.81522e-05
TNNC1	-0.821532	0.000318674
PBX1	-0.828256	0.0446914
AKAP2	-0.836437	0.00236654
TFAP4	-0.84132	0.0363058
OFUT2	-0.85314	3.10046e-05
MASU1	-0.853289	0.000187609
TF	-0.86027	0.0001491
THRB	-0.864151	0.0183289
IKBB	-0.874132	3.74425e-06
R3HD1	-0.876711	0.00513195
AOFB	-0.880218	3.57761e-06
CE024	-0.884718	0.00890867
PTGR1	-0.885575	0.00069732
CAN3	-0.891876	0.0163286
RBP10	-0.897564	3.96524e-05
FA32A	-0.908142	0.0011705
PBDC1	-0.909594	5.74277e-06
GDF15	-0.913635	0.000272184
SPCS1	-0.914778	3.91378e-06
CNOT4	-0.91525	0.000103046
TYDP1	-0.915467	0.00120861
RILP	-0.916933	0.000128393
PORED	-0.920089	8.78922e-06
XYLK	-0.938856	0.00667042
TXIP1	-0.943912	0.0279798
TM238	-0.944194	0.0161027
S35F2	-0.944468	1.58052e-05
ZN593	-0.951703	0.0050828
EAA3	-0.952578	0.00213511
ELOV1	-0.95577	5.64236e-06
TR10B	-0.958643	0.00349694
FRDA	-0.966825	0.00461501
OBRG	-0.968188	0.0156296
GP108	-0.9891	0.0408436
NDK8	-0.999872	0.00797703
ABCBB	-1.00971	3.89136e-05
ALDOC	-1.01733	0.0388579
STYX	-1.03416	0.00157154
GBRL2	-1.04079	0.00019658
CN119	-1.078	0.00793755
ADSV	-1.07951	0.00159288
RETR2	-1.10643	0.0104589
PAK4	-1.1369	8.75443e-05
KTI12	-1.1465	0.0106685
HGFA	-1.14655	7.59417e-05
AREG	-1.15428	8.04921e-05
TDRD3	-1.15622	0.00201742
E41LB	-1.17841	0.0025463
SH3L1	-1.1843	4.55547e-07
TMUB2	-1.18664	0.000824134
KPRP	-1.23938	0.0199767
VTDB	-1.25338	0.020498
CMIP	-1.27263	0.00483409
TM199	-1.31326	3.1152e-05
MACF1	-1.31878	0.00282154
MED9	-1.3235	0.00154736
NDC1	-1.35212	0.0226511
PP6R3	-1.35594	0.0131237
KCRU	-1.36577	0.000160402
ARCH	-1.42337	0.00288236
GGNB2	-1.51795	0.000516303
HXB9	-1.54936	0.0103846
CRUM3	-1.60118	0.000903163
FKB14	-1.6593	0.00680924
XCT	-1.70024	0.00110489
OLR1	-1.72219	5.4421e-06
RAB3B	-1.86923	0.00040606
H13	-2.12005	0.000292776
FBX28	-2.15326	0.0173275
NIPA1	-2.42363	0.000216672
STAT1	-4.20032	0.000692643
