# Supplementary material for: Proteome-Wide Analysis Reveals TFEB Targets for Establishment of a Prognostic Signature to Predict Clinical Outcomes of Colorectal Cancer
Source: Cancers (Basel). 2023 Jan 25;15(3):744. doi: 10.3390/cancers15030744 (PMC9913156; doi:10.3390/cancers15030744)
Supplement: Supplementary file 1 [file cancers-15-00744-s001.zip › Table S3.xlsx]

## Sheet: Sheet1
Table S3. The protein list of TFEB targets (Fold change: TFEB-S142A/S138A vs TFEB-WT > TFEB-WT vs control > 1.2; P.Value < 0.05 )
Protein Accession	Gene Name	Log2 FC
	Gene Name	TFEB-S142A/S138A vs TFEB-WT	TFEB-WT vs Control	TFEB-S142A/S138A vs Control
P28325	CST5	2.05651	3.82978	5.88629
Q96HU8	DIRAS2	2.39243	2.72126	5.1137
Q15750	TAB1	0.921799	2.13509	3.05689
P01009	SERPINA1	0.896438	1.19986	2.0963
O60656	UGT1A9	1.00146	1.071	2.07246
Q15274	QPRT	1.54171	0.446755	1.98846
P04004	VTN	0.679655	1.22892	1.90857
O15439	ABCC4	0.788814	1.07528	1.86409
Q14554	PDIA5	0.855308	0.986403	1.84171
Q9GZN1	ACTR6	1.03582	0.571629	1.60745
Q9BZQ8	NIBAN1	0.644235	0.928313	1.57255
Q8IVN8	SBSPON	0.411717	1.13012	1.54184
P42330	AKR1C3	0.725102	0.733994	1.4591
O14933	UBE2L6	0.673203	0.645578	1.31878
P0DMM9	SULT1A3	0.73659	0.536401	1.27299
P32929	CTH	0.48392	0.720424	1.20434
O15195	VILL	0.531685	0.638402	1.17009
Q13228	SELENBP1	0.772647	0.371551	1.1442
P15428	HPGD	0.454462	0.683305	1.13777
Q5VW38	GPR107	0.763211	0.356425	1.11964
Q53EL6	PDCD4	0.642532	0.466682	1.10921
P55061	TMBIM6	0.472701	0.631151	1.10385
P28065	PSMB9	0.40021	0.68583	1.08604
Q92597	NDRG1	0.770967	0.304611	1.07558
Q96BI1	SLC22A18	0.699231	0.364012	1.06324
Q9H6R4	NOL6	0.651383	0.388772	1.04016
P11137	MAP2	0.272868	0.758388	1.03126
Q9BUT1	BDH2	0.566957	0.457094	1.02405
P01033	TIMP1	0.360509	0.657768	1.01828
Q8NEU8	APPL2	0.370183	0.60585	0.976033
Q96GA7	SDSL	0.300285	0.65803	0.958314
Q96CM8	ACSF2	0.47277	0.475552	0.948321
Q08380	LGALS3BP	0.60225	0.337389	0.939638
O95479	H6PD	0.318133	0.60037	0.918503
O00462	MANBA	0.39002	0.498017	0.888037
Q9NRY6	PLSCR3	0.490596	0.381722	0.872318
P17405	SMPD1	0.506713	0.365372	0.872085
Q99523	SORT1	0.5614	0.309702	0.871101
Q9HAT2	SIAE	0.281369	0.583929	0.865298
Q9HB40	SCPEP1	0.575143	0.277614	0.852758
Q16890	TPD52L1	0.5032	0.345914	0.849115
P04066	FUCA1	0.423168	0.407679	0.830847
P26006	ITGA3	0.411259	0.402508	0.813767
O94953	KDM4B	0.453388	0.33651	0.789898
Q7L5L3	GDPD3	0.280482	0.49547	0.775953
O95865	DDAH2	0.342061	0.414511	0.756571
P10321	HLA-C	0.302372	0.448917	0.751289
O00469	PLOD2	0.413575	0.337237	0.750812
Q13557	CAMK2D	0.342398	0.407527	0.749925
Q6P1A2	LPCAT3	0.335914	0.401118	0.737032
P00966	ASS1	0.408161	0.325869	0.73403
Q5JS37	NHLRC3	0.384273	0.338429	0.722703
Q8IV56	PRR15	0.283391	0.415845	0.699236
P34913	EPHX2	0.377733	0.312787	0.69052
Q5BKX5	C19orf54	0.298244	0.378537	0.676781
P27361	MAPK3	0.287211	0.388383	0.675595
P01893	HLA-H	0.309447	0.354461	0.663908
P13473	LAMP2	0.266721	0.381907	0.648628
Q8NEY4	ATP6V1C2	0.310149	0.334743	0.644892
Q9BRP4	PAAF1	0.325332	0.283223	0.608555
